# Supplementary material for: Duplication of the mitochondrial control region is associated with increased longevity in birds
Source: publisher site journal article supplement (doi:10.18632/aging.101012), 2016-08-11
Supplement: Supplementary file 1 [file aging-v8i8-101012-supplementary-material-SD3.xlsx]

## Sheet: Sup2_RawDataNonSplitFamilies
Family	Order	YCR_GENUS	Gene Arrangment	Type	Active	Flight	Avg weight	Max age*	LnM	LnAMLS	Predicted Y	Residuals
Cerylidae	Coraciiformes	N		Waterbird	Day	Y	147.286	4.5	4.99237	1.50408	2.73199	-1.22791
Phasianidae	Galliformes	N		Terrestrial	Day	P	1038.58	11.5422	6.94561	2.44601	3.12678	-0.680772
Casuariidae	Casuariiformes	N		Grounddwelling	Day	N	36250	24	10.4982	3.17805	3.84484	-0.666791
Cuculidae	Cuculiformes	Y	E	Near passerine	Day	Y	107.1	8.25	5.31812	2.23324	2.79783	-0.564595
Odontophoridae	Galliformes	N		Terrestrial	Day	P	166	9	5.11199	2.19722	2.75617	-0.558941
Jacanidae	Charadriiformes	N		Wader	Day	Y	159.787	9.5	5.07384	2.25129	2.74846	-0.497164
Halcyonidae	Coraciiformes	N		Waterbird	Day	Y	91	8.5	4.51086	2.14007	2.63466	-0.494597
Coraciidae	Coraciiformes	N		Near passerine	Day	Y	126.857	9.2	4.84306	2.2192	2.70181	-0.482606
Podicipedidae	Podicipediformes	N		Diver	Day	Y	388.4	12.516	5.96204	2.52701	2.92798	-0.400972
Anhingidae	Suliformes	Y	C	Waterbird	Day	Y	1345	16.2	7.20415	2.78501	3.17904	-0.394029
Rallidae	Gruiformes	N		Waterbird	Day	Y	405.292	12.9282	6.00461	2.55941	2.93658	-0.377175
Acanthisittidae	Passeriformes	N		Passerine	Day	Y	16.5	7	2.80336	1.94591	2.28954	-0.343627
Thraupidae	Passeriformes	N		Passerine	Day	Y	31.75	8	3.45789	2.07944	2.42183	-0.342392
Sagittariidae	Accipitriformes	N		Raptor	Day	Y	3941	21.25	8.27919	3.05636	3.39633	-0.339975
Megapodiidae	Galliformes	N		megapode	Day	P	1251.67	18	7.13223	2.89037	3.1645	-0.274133
Phalacrocoracidae	Suliformes	Y	C	Waterbird	Day	Y	1826.64	19.5636	7.51023	2.97367	3.24091	-0.267234
Cracidae	Galliformes	N		Terrestrial	Day	P	2753	21.5	7.92045	3.06805	3.32382	-0.255768
Regulidae	Passeriformes	N		Passerine	Day	Y	8.2	6.66	2.10413	1.89612	2.14821	-0.252088
Picidae	Piciformes	Y	E	Passerine	Day	Y	83.72	10.6955	4.42748	2.36982	2.61781	-0.24799
Spheniscidae	Sphenisciformes	N		Arctic	Day	N	3685	23.6562	8.21203	3.16363	3.38276	-0.219129
Alaudidae	Passeriformes	Y	E	Passerine	Day	Y	30.4853	9	3.41724	2.19722	2.41362	-0.216393
Remizidae	Passeriformes	N		Passerine	Day	y	8.33333	7	2.12026	1.94591	2.15147	-0.205558
Laniidae	Passeriformes	N		Passerine	Day	Y	39.4	9.6	3.67377	2.26176	2.46547	-0.203704
Sittidae	Passeriformes	N		Passerine	Day	Y	15.75	8.05	2.75684	2.08567	2.28013	-0.194463
Locustellidae	Passeriformes	Y	D	Passerine	Day	Y	16.5	8.375	2.80336	2.12525	2.28954	-0.164287
Tyrannidae	Passeriformes	Y	E	Passerine	Day	Y	18.6727	8.6081	2.92706	2.1527	2.31454	-0.161838
Troglodytidae	Passeriformes	N		Passerine	Day	Y	13.05	8.1	2.56879	2.09186	2.24213	-0.150261
Falconidae	Falconiformes	Y	E	Raptor	Day	Y	569.912	17.4435	6.34548	2.85897	3.00548	-0.146515
Anatidae	Anseriformes	N		Waterbird	Day	Y	1668.41	21.7469	7.41963	3.07947	3.22259	-0.143121
Gaviidae	Gaviiformes	N		Diver	Day	Y	3183.33	25.0567	8.06568	3.22114	3.35318	-0.132037
Emberizidae	Passeriformes	N		Passerine	Day	Y	25.5806	9.60274	3.24184	2.26205	2.37816	-0.116115
Motacillidae	Passeriformes	N		Passerine	Day	Y	21.85	9.4	3.0842	2.24071	2.3463	-0.105592
Bombycillidae	Passeriformes	N		Passerine	Day	Y	43.5	10.85	3.77276	2.38417	2.48548	-0.101311
Otididae	Gruiformes	N		Terrestrial	Day	Y	3662.67	27.15	8.20595	3.30138	3.38153	-0.0801504
Icteridae	Passeriformes	N		Passerine	Day	Y	60.915	12.0629	4.10948	2.49013	2.55354	-0.0634045
Caprimulgidae	Caprimulgiformes	N		Nocturnal?	Night	Y	72.8	12.54	4.28772	2.52892	2.58956	-0.0606373
Accipitridae	Accipitriformes	Y	E	Raptor	Day	Y	2054.14	24.6748	7.62761	3.20578	3.26463	-0.058848
Ardeidae	Pelecaniformes	Y	C	Seabird	Day	Y	496.792	19.0217	6.20817	2.94558	2.97773	-0.0321514
Estrildidae	Passeriformes	N		Passerine	Day	y	13.2077	9.14944	2.5808	2.21369	2.24455	-0.0308605
Turdidae	Passeriformes	Y	C*	Passerine	Day	Y	60.1053	12.435	4.0961	2.52052	2.55083	-0.0303151
Vireonidae	Passeriformes	N		Passerine	Day	Y	13.21	9.32	2.58097	2.23216	2.24459	-0.0124255
Alcidae	Charadriiformes	N		Seabird	Day	Y	410	18.8531	6.01616	2.93668	2.93892	-0.00224137
Leiothrichidae	Passeriformes	Y	D	Passerine	Day	Y	74.2	13.5	4.30676	2.60269	2.59341	0.0092788
Ramphastidae	Piciformes	Y	D	Arboreal	Day	Y	169	16	5.1299	2.77259	2.75979	0.012803
Fringillidae	Passeriformes	N		Passerine	Day	Y	23.9444	10.9946	3.17574	2.39741	2.3648	0.0326034
Pycnonotidae	Passeriformes	Y	E	Passerine	Day	Y	34.2	11.82	3.53223	2.46979	2.43686	0.0329346
Columbidae	Columbiformes	N		Near passerine	Day	Y	194.222	16.8188	5.269	2.8225	2.7879	0.034597
Apterygidae	Apterygiformes	N		Grounddwelling	Night	N	2187.5	27.5	7.69051	3.31419	3.27735	0.0368395
Acrocephalidae	Passeriformes	Y	D	Passerine	Day	Y	14.5583	10.0491	2.67816	2.30748	2.26423	0.0432522
Rhipiduridae	Passeriformes	N		Passerine	Day	Y	14	10	2.63906	2.30259	2.25633	0.046257
Scolopacidae	Charadriiformes	N		Wader	Day	Y	116.448	15.4479	4.75744	2.73747	2.6845	0.0529673
Hirundinidae	Passeriformes	Y	D	Passerine	Day	Y	19.8357	10.8823	2.98748	2.38714	2.32675	0.060385
Muscicapidae	Passeriformes	N		Passerine	Day	Y	20.6789	11.0932	3.02912	2.40633	2.33517	0.0711604
Strigidae	Strigiformes	N		Nocturnal?	Night	Y	481.708	21.2395	6.17734	3.05586	2.9715	0.0843626
Gruidae	Gruiformes	N		Wader	Day	Y	5467.27	35.0545	8.60654	3.55691	3.4625	0.0944095
Ciconiidae	Ciconiiformes	N		Wader	Day	Y	4530.77	33.9	8.41865	3.52342	3.42452	0.0988958
Charadriidae	Charadriiformes	N		Wader	Day	Y	114.083	16.1781	4.73693	2.78366	2.68036	0.103301
Sylviidae	Passeriformes	Y	D	Passerine	Day	Y	15.0556	10.7975	2.71175	2.37931	2.27102	0.108294
Sulidae	Suliformes	Y	C	Waterbird	Day	Y	1707	28.1141	7.44249	3.33627	3.22722	0.109058
Paridae	Passeriformes	N		Passerine	Day	Y	11.9474	10.3279	2.48051	2.33485	2.22428	0.110566
Corvidae	Passeriformes	N		Passerine	Day	Y	266.036	19.3851	5.58363	2.9645	2.8515	0.113007
Passeridae	Passeriformes	N		Passerine	Day	Y	26.1667	12.21	3.26449	2.50226	2.38274	0.119513
Threskiornithidae	Pelecaniformes	N		Wader	Day	Y	1160.91	26.4955	7.05696	3.27697	3.14929	0.127683
Meliphagidae	Passeriformes	N		Passerine	Day	Y	29.5773	12.7541	3.38701	2.54585	2.40751	0.138344
Oriolidae	Gruiformes	N		Passerine	Day	Y	87.75	15.8933	4.47449	2.7659	2.62731	0.138587
Haematopodidae	Charadriiformes	N		Wader	Day	Y	636.4	23.796	6.45583	3.16952	3.02779	0.14173
Phylloscopidae	Passeriformes	Y	E	Passerine	Day	y	8.6	10	2.15176	2.30259	2.15783	0.144751
Balaenicipitidae	Pelecaniformes	N		Wader	Day	Y	5501	37	8.61269	3.61092	3.46374	0.147179
Aegithalidae	Passeriformes	Y	D	Passerine	Day	Y	7.95	9.95665	2.07317	2.29824	2.14195	0.156291
Drepanididae	Procellariiformes	N		Passerine	Day	Y	19	12	2.94444	2.48491	2.31805	0.166854
Anseranatidae	Anseriformes	N		Waterbird	Day	Y	2420	32	7.79152	3.46574	3.29776	0.167973
Trochilidae	Apodiformes	N		Hummingbird	Day	Y	4.05385	8.81923	1.39967	2.17693	2.00582	0.171117
Zosteropidae	Passeriformes	Y	D	Passerine	Day	Y	11.15	11.28	2.41144	2.42303	2.21032	0.21271
Phaethontidae	Phaethontiformes	N		Seabird	Day	Y	593	25.5	6.38519	3.23868	3.01351	0.225168
Sturnidae	Passeriformes	N		Passerine	Day	Y	97.5	17.75	4.57985	2.87639	2.64861	0.227777
Procellariidae	Procellariiformes	N		Waterbird	Day	Y	596.769	25.9929	6.39153	3.25782	3.01479	0.243033
Pandionidae	Accipitriformes	Y	D	Raptor	Day	Y	1500	32	7.31322	3.46574	3.20109	0.264649
Apodidae	Apodiformes	N		Aerial	Day	Y	34.1	15.02	3.5293	2.70938	2.43627	0.273116
Laridae	Charadriiformes	N		Seabird	Day	Y	622.217	27.173	6.43329	3.30222	3.02323	0.278993
Cathartidae	Cathartiformes	N		Raptor	Day	Y	4710	41	8.45744	3.71357	3.43236	0.281211
Pelecanidae	Pelecaniformes	Y	?	Waterbird	Day	Y	7167.5	44.825	8.87731	3.80277	3.51723	0.28554
Bucorvidae	Bucerotiformes	N		Rainforest	Day	Y	1245	31.8	7.12689	3.45947	3.16342	0.296041
Diomedeidae	Procellariiformes	Y	C	Seabird	Day	Y	3728.73	42.1817	8.22382	3.74199	3.38514	0.356846
Psittaculidae	Psittaciformes	Y	D	Arboreal	Day	Y	43.75	18	3.77849	2.89037	2.48663	0.403737
Petroicidae	Passeriformes	Y	E	Passerine	Day	Y	16.45	15.4715	2.80033	2.739	2.28892	0.450072
Aegothelidae	Aegotheliformes	N		Nocturnal?	Night	Y	44.25	20	3.78986	2.99573	2.48893	0.506801
Bucerotidae	Coraciiformes	Y	C	Rainforest	Day	Y	1613	42.1167	7.38585	3.74044	3.21577	0.524677
Psittacidae	Psittaciformes	Y	D	Arboreal	Day	Y	293.858	30.2561	5.6831	3.4097	2.8716	0.538098
Tytonidae	Strigiformes	N		Nocturnal?	Night	Y	426.833	34	6.05639	3.52636	2.94705	0.579308
Cacatuidae	Psittaciformes	N		Arboreal	Day	Y	512	40.8072	6.23832	3.70886	2.98382	0.725035
Hydrobatidae	Procellariiformes	Y	C	Seabird	Day	Y	44	27.8	3.78419	3.32504	2.48779	0.83725
Phoenicopteridae	Phoenicopteriformes	Y	E	Wader	Day	Y	2240	66.5	7.71423	4.1972	3.28214	0.915062

## Sheet: Chi
SL=	8									SL=	14
LL=	10									LL=	10
	YCR+	YCR-								YCR+	YCR-
SL	1	7							SL	2	12
LL	7	3							LL	7	3
http://graphpad.com/quickcalcs/contingency1.cfm
								Fisher's exact test
Fisher's exact test								The two-tailed P value equals 0.0104
The two-tailed P value equals 0.0248								The association between rows (groups) and columns (outcomes)
Chi-square with Yates correction								Chi-square with Yates correction
Chi squared equals 3.850 with 1 degrees of freedom.								Chi squared equals 5.531 with 1 degrees of freedom.
The two-tailed P value equals 0.0497								The two-tailed P value equals 0.0187

## Sheet: Ranking
Family	Order	YCR_GENUS	Gene Arrangment	Type	Active	Flight	Avg weight	Max age*	LnM	LnAMLS	Predicted Y	Residuals	Absolute Rank	Relative Rank
Cerylidae	Coraciiformes	N		Waterbird	Day	Y	147.286	4.5	4.99237	1.50408	2.73199	-1.22791	1	0.0108696
Phasianidae	Galliformes	N		Terrestrial	Day	P	1038.58	11.5422	6.94561	2.44601	3.12678	-0.680772	2	0.0217391
Casuariidae	Casuariiformes	N		Grounddwelling	Day	N	36250	24	10.4982	3.17805	3.84484	-0.666791	3	0.0326087
Cuculidae	Cuculiformes	Y	E	Near passerine	Day	Y	107.1	8.25	5.31812	2.23324	2.79783	-0.564595	4	0.0434783
Odontophoridae	Galliformes	N		Terrestrial	Day	P	166	9	5.11199	2.19722	2.75617	-0.558941	5	0.0543478
Jacanidae	Charadriiformes	N		Wader	Day	Y	159.787	9.5	5.07384	2.25129	2.74846	-0.497164	6	0.0652174
Halcyonidae	Coraciiformes	N		Waterbird	Day	Y	91	8.5	4.51086	2.14007	2.63466	-0.494597	7	0.076087
Coraciidae	Coraciiformes	N		Near passerine	Day	Y	126.857	9.2	4.84306	2.2192	2.70181	-0.482606	8	0.0869565
Podicipedidae	Podicipediformes	N		Diver	Day	Y	388.4	12.516	5.96204	2.52701	2.92798	-0.400972	9	0.0978261
Anhingidae	Suliformes	Y	C	Waterbird	Day	Y	1345	16.2	7.20415	2.78501	3.17904	-0.394029	10	0.108696
Rallidae	Gruiformes	N		Waterbird	Day	Y	405.292	12.9282	6.00461	2.55941	2.93658	-0.377175	11	0.119565
Acanthisittidae	Passeriformes	N		Passerine	Day	Y	16.5	7	2.80336	1.94591	2.28954	-0.343627	12	0.130435
Thraupidae	Passeriformes	N		Passerine	Day	Y	31.75	8	3.45789	2.07944	2.42183	-0.342392	13	0.141304
Sagittariidae	Accipitriformes	N		Raptor	Day	Y	3941	21.25	8.27919	3.05636	3.39633	-0.339975	14	0.152174
Megapodiidae	Galliformes	N		megapode	Day	P	1251.67	18	7.13223	2.89037	3.1645	-0.274133	15	0.163043
Phalacrocoracidae	Suliformes	Y	C	Waterbird	Day	Y	1826.64	19.5636	7.51023	2.97367	3.24091	-0.267234	16	0.173913
Cracidae	Galliformes	N		Terrestrial	Day	P	2753	21.5	7.92045	3.06805	3.32382	-0.255768	17	0.184783
Regulidae	Passeriformes	N		Passerine	Day	Y	8.2	6.66	2.10413	1.89612	2.14821	-0.252088	18	0.195652
Picidae	Piciformes	Y	E	Passerine	Day	Y	83.72	10.6955	4.42748	2.36982	2.61781	-0.24799	19	0.206522
Spheniscidae	Sphenisciformes	N		Arctic	Day	N	3685	23.6562	8.21203	3.16363	3.38276	-0.219129	20	0.217391
Alaudidae	Passeriformes	Y	E	Passerine	Day	Y	30.4853	9	3.41724	2.19722	2.41362	-0.216393	21	0.228261
Remizidae	Passeriformes	N		Passerine	Day	y	8.33333	7	2.12026	1.94591	2.15147	-0.205558	22	0.23913
Laniidae	Passeriformes	N		Passerine	Day	Y	39.4	9.6	3.67377	2.26176	2.46547	-0.203704	23	0.25
Sittidae	Passeriformes	N		Passerine	Day	Y	15.75	8.05	2.75684	2.08567	2.28013	-0.194463	24	0.26087
Locustellidae	Passeriformes	Y	D	Passerine	Day	Y	16.5	8.375	2.80336	2.12525	2.28954	-0.164287	25	0.271739
Tyrannidae	Passeriformes	Y	E	Passerine	Day	Y	18.6727	8.6081	2.92706	2.1527	2.31454	-0.161838	26	0.282609
Troglodytidae	Passeriformes	N		Passerine	Day	Y	13.05	8.1	2.56879	2.09186	2.24213	-0.150261	27	0.293478
Falconidae	Falconiformes	Y	E	Raptor	Day	Y	569.912	17.4435	6.34548	2.85897	3.00548	-0.146515	28	0.304348
Anatidae	Anseriformes	N		Waterbird	Day	Y	1668.41	21.7469	7.41963	3.07947	3.22259	-0.143121	29	0.315217
Gaviidae	Gaviiformes	N		Diver	Day	Y	3183.33	25.0567	8.06568	3.22114	3.35318	-0.132037	30	0.326087
Emberizidae	Passeriformes	N		Passerine	Day	Y	25.5806	9.60274	3.24184	2.26205	2.37816	-0.116115	31	0.336957
Motacillidae	Passeriformes	N		Passerine	Day	Y	21.85	9.4	3.0842	2.24071	2.3463	-0.105592	32	0.347826
Bombycillidae	Passeriformes	N		Passerine	Day	Y	43.5	10.85	3.77276	2.38417	2.48548	-0.101311	33	0.358696
Otididae	Gruiformes	N		Terrestrial	Day	Y	3662.67	27.15	8.20595	3.30138	3.38153	-0.0801504	34	0.369565
Icteridae	Passeriformes	N		Passerine	Day	Y	60.915	12.0629	4.10948	2.49013	2.55354	-0.0634045	35	0.380435
Caprimulgidae	Caprimulgiformes	N		Nocturnal?	Night	Y	72.8	12.54	4.28772	2.52892	2.58956	-0.0606373	36	0.391304
Accipitridae	Accipitriformes	Y	E	Raptor	Day	Y	2054.14	24.6748	7.62761	3.20578	3.26463	-0.058848	37	0.402174
Ardeidae	Pelecaniformes	Y	C	Seabird	Day	Y	496.792	19.0217	6.20817	2.94558	2.97773	-0.0321514	38	0.413043
Estrildidae	Passeriformes	N		Passerine	Day	y	13.2077	9.14944	2.5808	2.21369	2.24455	-0.0308605	39	0.423913
Turdidae	Passeriformes	Y	C*	Passerine	Day	Y	60.1053	12.435	4.0961	2.52052	2.55083	-0.0303151	40	0.434783
Vireonidae	Passeriformes	N		Passerine	Day	Y	13.21	9.32	2.58097	2.23216	2.24459	-0.0124255	41	0.445652
Alcidae	Charadriiformes	N		Seabird	Day	Y	410	18.8531	6.01616	2.93668	2.93892	-0.00224137	42	0.456522
Leiothrichidae	Passeriformes	Y	D	Passerine	Day	Y	74.2	13.5	4.30676	2.60269	2.59341	0.0092788	43	0.467391
Ramphastidae	Piciformes	Y	D	Arboreal	Day	Y	169	16	5.1299	2.77259	2.75979	0.012803	44	0.478261
Fringillidae	Passeriformes	N		Passerine	Day	Y	23.9444	10.9946	3.17574	2.39741	2.3648	0.0326034	45	0.48913
Pycnonotidae	Passeriformes	Y	E	Passerine	Day	Y	34.2	11.82	3.53223	2.46979	2.43686	0.0329346	46	0.5
Columbidae	Columbiformes	N		Near passerine	Day	Y	194.222	16.8188	5.269	2.8225	2.7879	0.034597	47	0.51087
Apterygidae	Apterygiformes	N		Grounddwelling	Night	N	2187.5	27.5	7.69051	3.31419	3.27735	0.0368395	48	0.521739
Acrocephalidae	Passeriformes	Y	D	Passerine	Day	Y	14.5583	10.0491	2.67816	2.30748	2.26423	0.0432522	49	0.532609
Rhipiduridae	Passeriformes	N		Passerine	Day	Y	14	10	2.63906	2.30259	2.25633	0.046257	50	0.543478
Scolopacidae	Charadriiformes	N		Wader	Day	Y	116.448	15.4479	4.75744	2.73747	2.6845	0.0529673	51	0.554348
Hirundinidae	Passeriformes	Y	D	Passerine	Day	Y	19.8357	10.8823	2.98748	2.38714	2.32675	0.060385	52	0.565217
Muscicapidae	Passeriformes	N		Passerine	Day	Y	20.6789	11.0932	3.02912	2.40633	2.33517	0.0711604	53	0.576087
Strigidae	Strigiformes	N		Nocturnal?	Night	Y	481.708	21.2395	6.17734	3.05586	2.9715	0.0843626	54	0.586957
Gruidae	Gruiformes	N		Wader	Day	Y	5467.27	35.0545	8.60654	3.55691	3.4625	0.0944095	55	0.597826
Ciconiidae	Ciconiiformes	N		Wader	Day	Y	4530.77	33.9	8.41865	3.52342	3.42452	0.0988958	56	0.608696
Charadriidae	Charadriiformes	N		Wader	Day	Y	114.083	16.1781	4.73693	2.78366	2.68036	0.103301	57	0.619565
Sylviidae	Passeriformes	Y	D	Passerine	Day	Y	15.0556	10.7975	2.71175	2.37931	2.27102	0.108294	58	0.630435
Sulidae	Suliformes	Y	C	Waterbird	Day	Y	1707	28.1141	7.44249	3.33627	3.22722	0.109058	59	0.641304
Paridae	Passeriformes	N		Passerine	Day	Y	11.9474	10.3279	2.48051	2.33485	2.22428	0.110566	60	0.652174
Corvidae	Passeriformes	N		Passerine	Day	Y	266.036	19.3851	5.58363	2.9645	2.8515	0.113007	61	0.663043
Passeridae	Passeriformes	N		Passerine	Day	Y	26.1667	12.21	3.26449	2.50226	2.38274	0.119513	62	0.673913
Threskiornithidae	Pelecaniformes	N		Wader	Day	Y	1160.91	26.4955	7.05696	3.27697	3.14929	0.127683	63	0.684783
Meliphagidae	Passeriformes	N		Passerine	Day	Y	29.5773	12.7541	3.38701	2.54585	2.40751	0.138344	64	0.695652
Oriolidae	Gruiformes	N		Passerine	Day	Y	87.75	15.8933	4.47449	2.7659	2.62731	0.138587	65	0.706522
Haematopodidae	Charadriiformes	N		Wader	Day	Y	636.4	23.796	6.45583	3.16952	3.02779	0.14173	66	0.717391
Phylloscopidae	Passeriformes	Y	E	Passerine	Day	y	8.6	10	2.15176	2.30259	2.15783	0.144751	67	0.728261
Balaenicipitidae	Pelecaniformes	N		Wader	Day	Y	5501	37	8.61269	3.61092	3.46374	0.147179	68	0.73913
Aegithalidae	Passeriformes	Y	D	Passerine	Day	Y	7.95	9.95665	2.07317	2.29824	2.14195	0.156291	69	0.75
Drepanididae	Procellariiformes	N		Passerine	Day	Y	19	12	2.94444	2.48491	2.31805	0.166854	70	0.76087
Anseranatidae	Anseriformes	N		Waterbird	Day	Y	2420	32	7.79152	3.46574	3.29776	0.167973	71	0.771739
Trochilidae	Apodiformes	N		Hummingbird	Day	Y	4.05385	8.81923	1.39967	2.17693	2.00582	0.171117	72	0.782609
Zosteropidae	Passeriformes	Y	D	Passerine	Day	Y	11.15	11.28	2.41144	2.42303	2.21032	0.21271	73	0.793478
Phaethontidae	Phaethontiformes	N		Seabird	Day	Y	593	25.5	6.38519	3.23868	3.01351	0.225168	74	0.804348
Sturnidae	Passeriformes	N		Passerine	Day	Y	97.5	17.75	4.57985	2.87639	2.64861	0.227777	75	0.815217
Procellariidae	Procellariiformes	N		Waterbird	Day	Y	596.769	25.9929	6.39153	3.25782	3.01479	0.243033	76	0.826087
Pandionidae	Accipitriformes	Y	D	Raptor	Day	Y	1500	32	7.31322	3.46574	3.20109	0.264649	77	0.836957
Apodidae	Apodiformes	N		Aerial	Day	Y	34.1	15.02	3.5293	2.70938	2.43627	0.273116	78	0.847826
Laridae	Charadriiformes	N		Seabird	Day	Y	622.217	27.173	6.43329	3.30222	3.02323	0.278993	79	0.858696
Cathartidae	Cathartiformes	N		Raptor	Day	Y	4710	41	8.45744	3.71357	3.43236	0.281211	80	0.869565
Pelecanidae	Pelecaniformes	Y	?	Waterbird	Day	Y	7167.5	44.825	8.87731	3.80277	3.51723	0.28554	81	0.880435
Bucorvidae	Bucerotiformes	N		Rainforest	Day	Y	1245	31.8	7.12689	3.45947	3.16342	0.296041	82	0.891304
Diomedeidae	Procellariiformes	Y	C	Seabird	Day	Y	3728.73	42.1817	8.22382	3.74199	3.38514	0.356846	83	0.902174
Psittaculidae	Psittaciformes	Y	D	Arboreal	Day	Y	43.75	18	3.77849	2.89037	2.48663	0.403737	84	0.913043
Petroicidae	Passeriformes	Y	E	Passerine	Day	Y	16.45	15.4715	2.80033	2.739	2.28892	0.450072	85	0.923913
Aegothelidae	Aegotheliformes	N		Nocturnal?	Night	Y	44.25	20	3.78986	2.99573	2.48893	0.506801	86	0.934783
Bucerotidae	Coraciiformes	Y	C	Rainforest	Day	Y	1613	42.1167	7.38585	3.74044	3.21577	0.524677	87	0.945652
Psittacidae	Psittaciformes	Y	D	Arboreal	Day	Y	293.858	30.2561	5.6831	3.4097	2.8716	0.538098	88	0.956522
Tytonidae	Strigiformes	N		Nocturnal?	Night	Y	426.833	34	6.05639	3.52636	2.94705	0.579308	89	0.967391
Cacatuidae	Psittaciformes	N		Arboreal	Day	Y	512	40.8072	6.23832	3.70886	2.98382	0.725035	90	0.978261
Hydrobatidae	Procellariiformes	Y	C	Seabird	Day	Y	44	27.8	3.78419	3.32504	2.48779	0.83725	91	0.98913
Phoenicopteridae	Phoenicopteriformes	Y	E	Wader	Day	Y	2240	66.5	7.71423	4.1972	3.28214	0.915062	92	1
