# Supplementary material for: Duplication of the mitochondrial control region is associated with increased longevity in birds
Source: publisher site journal article supplement (doi:10.18632/aging.101012), 2016-08-11
Supplement: Supplementary file 2 [file aging-v8i8-101012-supplementary-material-SD1.pdf]

**SUPPLEMENTAL DATA**

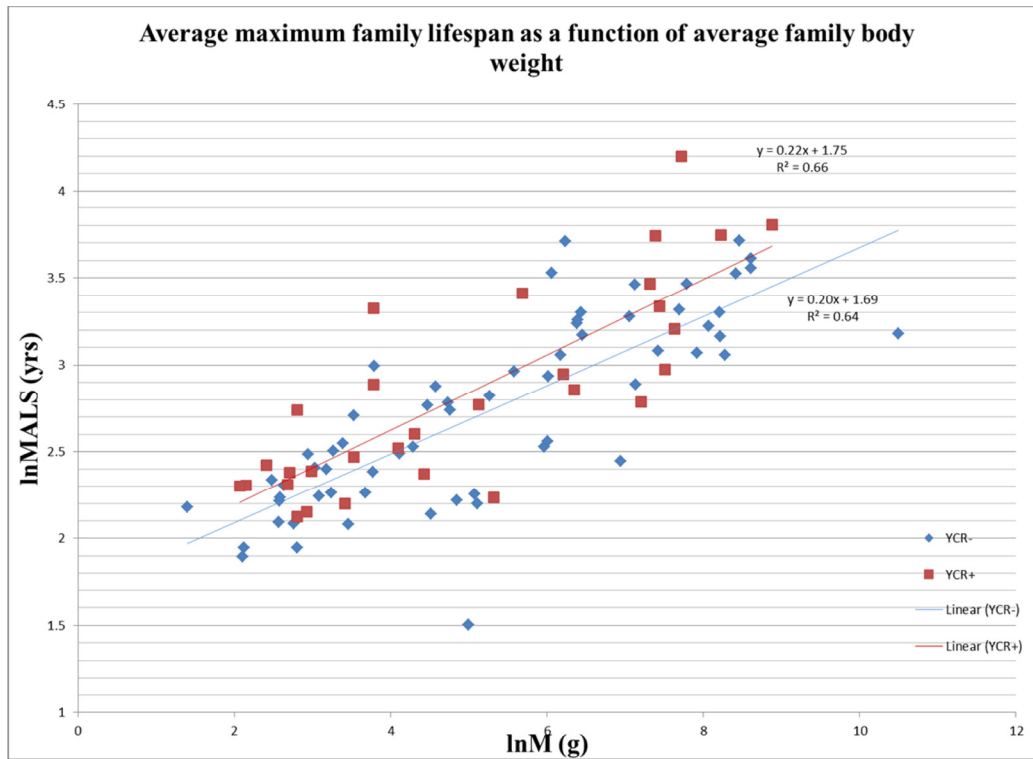

**Supplemental Figure 1.** Distribution of average YCR+/- family lifespan against average body weight.

**Supplemental Set 1. Binomial distribution table.**

| Probability of success on a single trial = 0.5 | YCR+ | YCR- |
|------------------------------------------------|------|------|
| No of trials                                   | 30   | 62   |
| No above the line                              | 19   | 31   |
| P-value                                        | 0.05 | 0.10 |

<http://stattrek.com/online-calculator/binomial.aspx>

Please browse Full Text version of this manuscript to see Supplemental materials:

**Supplemental Set 2.** List of raw data for all families split by YCR status

**Supplemental Set 3.** Raw data for regression and QQ plot - mixed families treated as single groups.

**Supplemental Set 4.** raw data for the correlation of genetic distance between species with difference in life expectancy relative to expectation from body weight regression
