# Supplementary material for: Duplication of the mitochondrial control region is associated with increased longevity in birds
Source: publisher site journal article supplement (doi:10.18632/aging.101012), 2016-08-11
Supplement: Supplementary file 2 [file aging-v8i8-101012-supplementary-material-SD2.xlsx]

## Sheet: Sup2_RawDataSplitFamilies
Family	Order	Representative Species	NCBI Accession #	YCR_GENUS	Type	Active	Flight	Avg weight	Max age*	LnM	LnAMLS	Predicted Y	Residuals	Absolute rank
Cerylidae	Coraciiformes	Ceryle rudis	KJ461938.1	N	Waterbird	Day	Y	147.286	4.5	4.99237	1.50408	2.75366	-1.24958	1	0.0102041
Phasianidae	Galliformes	Coturnix japonica	AP003195	N	Terrestrial	Day	P	1038.58	11.5422	6.94561	2.44601	3.14853	-0.702515	2	0.0204082
Casuariidae	Casuariiformes	Casuarius casuarius	AF338713	N	Grounddwelling	Day	N	36250	24	10.4982	3.17805	3.86672	-0.688661	3	0.0306122
Ardeidae_N	Pelecaniformes	Dupetor flavicollis	KJ643141.1	N	Seabird	Day	Y	453.333	10.5	6.11663	2.35138	2.98094	-0.629564	4	0.0408163
Odontophoridae	Galliformes	Colinus virginianus	NC_024620	N	Terrestrial	Day	P	166	9	5.11199	2.19722	2.77784	-0.580618	5	0.0510204
Cuculidae	Cuculiformes	Eudynamys taitensis	EU410487.1	Y	Near passerine	Day	Y	107.1	8.25	4.67283	2.11021	2.68906	-0.578849	6	0.0612245
Jacanidae	Charadriiformes	Jacana jacana	KJ631049.1	N	Wader	Day	Y	159.787	9.5	5.07384	2.25129	2.77013	-0.518839	7	0.0714286
Halcyonidae	Coraciiformes	Todiramphus sanctus vagans	EU410489.1	N	Waterbird	Day	Y	91	8.5	4.51086	2.14007	2.65632	-0.516252	8	0.0816327
Coraciidae	Coraciiformes	Eurystomus orientalis	NC_011716	N	Near passerine	Day	Y	126.857	9.2	4.84306	2.2192	2.72348	-0.504273	9	0.0918367
Podicipedidae	Podicipediformes	Tachybaptus novaehollandiae	EF532936.1	N	Diver	Day	Y	388.4	12.516	5.96204	2.52701	2.94969	-0.42268	10	0.102041
Anhingidae	Suliformes	Anhinga rufa	GU071055.1	Y	Waterbird	Day	Y	1345	16.2	7.20415	2.78501	3.20079	-0.415781	11	0.112245
Rallidae	Gruiformes	Fulica atra	NC_025500	N	Waterbird	Day	Y	405.292	12.9282	6.00461	2.55941	2.95829	-0.398884	12	0.122449
Acanthisittidae	Passeriformes	Acanthisitta chloris	AY325307.1	N	Passerine	Day	Y	16.5	7	2.80336	1.94591	2.31113	-0.365221	13	0.132653
Thraupidae	Passeriformes	Thraupis episcopus	NC_025596	N	Passerine	Day	Y	31.75	8	3.45789	2.07944	2.44345	-0.36401	14	0.142857
Sagittariidae	Accipitriformes	Sagittarius serpentarius	NC_023788	N	Raptor	Day	Y	3941	21.25	8.27919	3.05636	3.41812	-0.361765	15	0.153061
Megapodiidae	Galliformes	alectura lathami	NC_007227	N	megapode	Day	P	1251.67	18	7.13223	2.89037	3.18625	-0.295882	16	0.163265
Phalacrocoracidae	Suliformes	Phalacrocorax chalconotus	GU071054.1	Y	Waterbird	Day	Y	1826.64	19.5636	7.51023	2.97367	3.26267	-0.288997	17	0.173469
Cracidae	Galliformes	Crax rubra	KJ914545.1	N	Terrestrial	Day	P	2753	21.5	7.92045	3.06805	3.3456	-0.277546	18	0.183673
Regulidae	Passeriformes	Regulus calendula	NC_024866	N	Passerine	Day	Y	8.2	6.66	2.10413	1.89612	2.16978	-0.273657	19	0.193878
Picidae	Piciformes	Dryocopus pileatus	NC_008546	Y	Passerine	Day	Y	83.72	10.6955	4.42748	2.36982	2.63946	-0.269642	20	0.204082
Spheniscidae	Sphenisciformes	Eudyptes chrysocome	AP009189.1	N	Arctic	Day	N	3685	23.6562	8.21203	3.16363	3.40454	-0.240917	21	0.214286
Alaudidae	Passeriformes	Alauda arvensis	NC_020425	Y	Passerine	Day	Y	30.4853	9	3.41724	2.19722	2.43523	-0.238009	22	0.22449
Remizidae	Passeriformes	Remiz consobrinus	NC_021641	N	Passerine	Day	y	8.33333	7	2.12026	1.94591	2.17304	-0.227127	23	0.234694
Laniidae	Passeriformes	Lanius tephronotus	NC_021105	N	Passerine	Day	Y	39.4	9.6	3.67377	2.26176	2.48709	-0.225329	24	0.244898
Sittidae	Passeriformes	Sitta carolinensis	NC_024870	N	Passerine	Day	Y	15.75	8.05	2.75684	2.08567	2.30173	-0.216055	25	0.255102
Locustellidae	Passeriformes	Locustella pryeri	KJ001760.1	Y	Passerine	Day	Y	16.5	8.375	2.80336	2.12525	2.31113	-0.18588	26	0.265306
Tyrannidae	Passeriformes	Mionectes oleagineus	NC_024682	Y	Passerine	Day	Y	18.6727	8.6081	2.92706	2.1527	2.33614	-0.183436	27	0.27551
Troglodytidae	Passeriformes	Henicorhina leucosticta	NC_024673	N	Passerine	Day	Y	13.05	8.1	2.56879	2.09186	2.26371	-0.171846	28	0.285714
Falconidae	Falconiformes	Falco peregrinus	AF090338	Y	Raptor	Day	Y	569.912	17.4435	6.34548	2.85897	3.0272	-0.168236	29	0.295918
Anatidae	Anseriformes	Anser albifrons	AF363031	N	Waterbird	Day	Y	1668.41	21.7469	7.41963	3.07947	3.24435	-0.164881	30	0.306122
Gaviidae	Gaviiformes	Gavia stellata	AY293618.1	N	Diver	Day	Y	3183.33	25.0567	8.06568	3.22114	3.37496	-0.15382	31	0.316327
Emberizidae	Passeriformes	Cardinalis cardinalis	NC_025618	N	Passerine	Day	Y	25.5806	9.60274	3.24184	2.26205	2.39977	-0.137725	32	0.326531
Motacillidae	Passeriformes	Anthus novaeseelandiae	NC_029137.1	N	Passerine	Day	Y	21.85	9.4	3.0842	2.24071	2.36791	-0.127196	33	0.336735
Bombycillidae	Passeriformes	Bombycilla cedrorum	KJ909187	N	Passerine	Day	Y	43.5	10.85	3.77276	2.38417	2.5071	-0.12294	34	0.346939
Otididae	Gruiformes	Otis tarda	FJ751803.1	N	Terrestrial	Day	Y	3662.67	27.15	8.20595	3.30138	3.40332	-0.101938	35	0.357143
Icteridae	Passeriformes	Agelaius phoeniceus	KM078767	N	Passerine	Day	Y	60.915	12.0628	4.10948	2.49013	2.57518	-0.0850452	36	0.367347
Caprimulgidae	Caprimulgiformes	Caprimulgus indicus	KM272749	N	Nocturnal?	Night	Y	72.8	12.54	4.28772	2.52892	2.61121	-0.0822844	37	0.377551
Accipitridae	Accipitriformes	Buteo Buteo	AF380305.2	Y	Raptor	Day	Y	2054.14	24.6748	7.62761	3.20578	3.2864	-0.0806152	38	0.387755
Turdidae_N	Passeriformes	Turdus hortulorum	NC_024552	N	Passerine	Day	Y	59.6667	12.1076	4.08877	2.49384	2.57099	-0.0771526	39	0.397959
Estrildidae	Passeriformes	Taeniopygia guttata	NC_007897	N	Passerine	Day	y	13.2077	9.14944	2.5808	2.21369	2.26614	-0.0524462	40	0.408163
Vireonidae	Passeriformes	Vireo olivaceus	NC_024869	N	Passerine	Day	Y	13.21	9.32	2.58097	2.23216	2.26617	-0.0340112	41	0.418367
Alcidae	Charadriiformes	Synthliboramphus antiquus	AP009042.1	N	Seabird	Day	Y	410	18.8531	6.01616	2.93668	2.96063	-0.0239506	42	0.428571
Leiothrichidae	Passeriformes	Garrulax affinis	NC_029402.1	Y	Passerine	Day	Y	74.2	13.5	4.30676	2.60269	2.61506	-0.012369	43	0.438776
Ramphastidae	Piciformes	Pteroglossus azara	NC_008549	Y	Arboreal	Day	Y	169	16	5.1299	2.77259	2.78146	-0.0088744	44	0.44898
Fringillidae	Passeriformes	Fringilla coelebs	NC_025599	N	Passerine	Day	Y	23.9444	10.9946	3.17574	2.39741	2.38641	0.0109963	45	0.459184
Pycnonotidae	Passeriformes	Pycnonotus melanicterus	NC_024730	Y	Passerine	Day	Y	34.2	11.82	3.53223	2.46979	2.45848	0.0113146	46	0.469388
Columbidae	Columbiformes	Columba livia	NC_013978	N	Near passerine	Day	Y	194.222	16.8188	5.269	2.8225	2.80958	0.0129146	47	0.479592
Apterygidae	Apterygiformes	Apteryx haastii	NC_002782	N	Grounddwelling	Night	N	2187.5	27.5	7.69051	3.31419	3.29912	0.0150701	48	0.489796
Acrocephalidae	Passeriformes	Acrocephalus scirpaceus	NC_010227	Y	Passerine	Day	Y	14.5583	10.0491	2.67816	2.30748	2.28582	0.021663	49	0.5
Rhipiduridae	Passeriformes	Rhipidura fuliginosa	NC_029145.1	N	Passerine	Day	Y	14	10	2.63906	2.30259	2.27792	0.0246692	50	0.510204
Scolopacidae	Charadriiformes	Arenaria interpres	AY074885.2	N	Wader	Day	Y	116.448	15.4479	4.75744	2.73747	2.70617	0.0313033	51	0.520408
Hirundinidae	Passeriformes	Cecropis daurica	NC_024107	Y	Passerine	Day	Y	19.8357	10.8823	2.98748	2.38714	2.34835	0.0387846	52	0.530612
Muscicapidae	Passeriformes	Luscinia cyanura	NC_026067	N	Passerine	Day	Y	20.6789	11.0932	3.02912	2.40633	2.35677	0.0495585	53	0.540816
Strigidae	Strigiformes	bubo bubo	AB918148	N	Nocturnal?	Night	Y	481.708	21.2395	6.17734	3.05586	2.99321	0.0626475	54	0.55102
Gruidae	Gruiformes	Grus grus	NC_020577	N	Wader	Day	Y	5467.27	35.0545	8.60654	3.55691	3.4843	0.0726071	55	0.561224
Ciconiidae	Ciconiiformes	Ciconia ciconia	AB026818.1	N	Wader	Day	Y	4530.77	33.9	8.41865	3.52342	3.44631	0.0771002	56	0.571429
Ardeidae_Y	Pelecaniformes	Botaurus stellaris	KJ190955	Y	Seabird	Day	Y	511.278	21.8622	6.23691	3.08476	3.00526	0.0795033	57	0.581633
Charadriidae	Charadriiformes	Vanellus vanellus	NC_025637	N	Wader	Day	Y	114.083	16.1781	4.73693	2.78366	2.70202	0.0816376	58	0.591837
Sylviidae	Passeriformes	Sylvia atricapilla	NC_010228	Y	Passerine	Day	Y	15.0556	10.7975	2.71175	2.37931	2.29261	0.0867038	59	0.602041
Sulidae	Suliformes	Morus serrator	GU071056.1	Y	Waterbird	Day	Y	1707	28.1141	7.44249	3.33627	3.24898	0.0872971	60	0.612245
Paridae	Passeriformes	Pseudopodoces humilis	NC_014341	N	Passerine	Day	Y	11.9474	10.3279	2.48051	2.33485	2.24586	0.0889842	61	0.622449
Corvidae	Passeriformes	Garrulus glandarius	NC_015810	N	Passerine	Day	Y	266.036	19.3851	5.58363	2.9645	2.87319	0.091313	62	0.632653
Passeridae	Passeriformes	Passer montanus	NC_024821	N	Passerine	Day	Y	26.1667	12.21	3.26449	2.50226	2.40435	0.097903	63	0.642857
Threskiornithidae	Pelecaniformes	Nipponia nippon	AB104902.1	N	Wader	Day	Y	1160.91	26.4955	7.05696	3.27697	3.17104	0.105937	64	0.653061
Meliphagidae	Passeriformes	Prosthemadera novaeseelandiae	NC_029144.1	N	Passerine	Day	Y	29.5773	12.7541	3.38701	2.54585	2.42912	0.116729	65	0.663265
Oriolidae	Gruiformes	Oriolus chinensis	NC_020424	N	Passerine	Day	Y	87.75	15.8933	4.47449	2.7659	2.64897	0.116933	66	0.673469
Haematopodidae	Charadriiformes	Haematopus ater	AY074886.2	N	Wader	Day	Y	636.4	23.796	6.45583	3.16952	3.04951	0.120005	67	0.683673
Phylloscopidae	Passeriformes	Phylloscopus inornatus	KF742677	Y	Passerine	Day	y	8.6	10	2.15176	2.30259	2.1794	0.12318	68	0.693878
Balaenicipitidae	Pelecaniformes	Balaeniceps rex	GU071053.1	N	Wader	Day	Y	5501	37	8.61269	3.61092	3.48554	0.125376	69	0.704082
Aegithalidae	Passeriformes	aegithalos caudatus	KF951088.1	Y	Passerine	Day	Y	7.95	9.95665	2.07317	2.29824	2.16352	0.134724	70	0.714286
Drepanididae	Procellariiformes	Himatione sanguinea	NC_025602	N	Passerine	Day	Y	19	12	2.94444	2.48491	2.33965	0.145255	71	0.72449
Anseranatidae	Anseriformes	anseranas semipalmata	NC_005933	N	Waterbird	Day	Y	2420	32	7.79152	3.46574	3.31954	0.1462	72	0.734694
Trochilidae	Apodiformes	Archilochus colubris	NC_010094	N	Hummingbird	Day	Y	4.05385	8.81923	1.39967	2.17693	2.02736	0.149573	73	0.744898
Zosteropidae	Passeriformes	Zosterops lateralis	NC_029146	Y	Passerine	Day	Y	11.15	11.28	2.41144	2.42303	2.2319	0.19113	74	0.755102
Phaethontidae	Phaethontiformes	Phaethon rubricauda	AP009043	N	Seabird	Day	Y	593	25.5	6.38519	3.23868	3.03523	0.203445	75	0.765306
Sturnidae	Passeriformes	Sturnus sericeus	NC_014455	N	Passerine	Day	Y	97.5	17.75	4.57985	2.87639	2.67027	0.206119	76	0.77551
Procellariidae	Procellariiformes	Pterodroma brevirostris	AY158678.1	N	Waterbird	Day	Y	596.769	25.9929	6.39153	3.25782	3.03651	0.221311	77	0.785714
Pandionidae	Accipitriformes	Pandion haliaetus	DQ780884.1	Y	Raptor	Day	Y	1500	32	7.31322	3.46574	3.22284	0.242894	78	0.795918
Petroicidae_Y	Passeriformes	Petroica boodang	NC_019666	Y	Passerine	Day	Y	11.6667	12.0698	2.45674	2.49071	2.24106	0.249653	79	0.806122
Apodidae	Apodiformes	Apus apus	AM237310.1	N	Aerial	Day	Y	34.1	15.02	3.5293	2.70938	2.45789	0.251496	80	0.816327
Laridae	Charadriiformes	Larus dominicanus	AY293619.1	N	Seabird	Day	Y	622.217	27.173	6.43329	3.30222	3.04496	0.257269	81	0.826531
Cathartidae	Cathartiformes	Cathartes aura	AY463690.1	N	Raptor	Day	Y	4710	41	8.45744	3.71357	3.45416	0.259414	82	0.836735
Pelecanidae	Pelecaniformes	Pelecanus conspicillatus	DQ780883.1	Y	Waterbird	Day	Y	7167.5	44.825	8.87731	3.80277	3.53904	0.263728	83	0.846939
Bucorvidae	Bucerotiformes	Bycanistes brevis	HM640210.1	N	Rainforest	Day	Y	1245	31.8	7.12689	3.45947	3.18517	0.274292	84	0.857143
Psittaculidae_N	Psittaciformes	Agapornis roseicollis	EU410486	N	Arboreal	Day	Y	48.3333	16.5	3.87812	2.80336	2.5284	0.274956	85	0.867347
Turdidae_Y	Passeriformes	turdus philomelos	NC_029147.1	Y	Passerine	Day	Y	68	18	4.21951	2.89037	2.59742	0.292953	86	0.877551
Diomedeidae	Procellariiformes	Diomedea melanophris	AY158677.2	Y	Seabird	Day	Y	3728.73	42.1817	8.22382	3.74199	3.40693	0.335057	87	0.887755
Psittacidae_N	Psittaciformes	Brotogeris cyanoptera	HM627323.1	N	Arboreal	Day	Y	194.091	23.39	5.26833	3.15231	2.80945	0.342861	88	0.897959
Aegothelidae	Aegotheliformes	Aegotheles cristatus	EU344979.1	N	Nocturnal?	Night	Y	44.25	20	3.78986	2.99573	2.51056	0.485172	89	0.908163
Petroicidae_N	Passeriformes	Tregellasia leucops	NC_024871	N	Passerine	Day	Y	18.1667	16.963	2.89959	2.83103	2.33058	0.50045	90	0.918367
Tytonidae	Strigiformes	Phodilus badius	KF961183.1	N	Nocturnal?	Night	Y	459.125	34	6.12932	3.52636	2.98351	0.542854	91	0.928571
Psittaculidae_Y	Psittaciformes	Melopsittacus undulatus	EF450826.1	Y	Arboreal	Day	Y	30	21	3.4012	3.04452	2.43199	0.612533	92	0.938776
Psittacidae_Y	Psittaciformes	Amazona barbadensis barbadensis	JX524615.1	Y	Arboreal	Day	Y	393.625	37.1222	5.9754	3.61422	2.95239	0.661827	93	0.94898
Bucerotidae_N	Coraciiformes	Aceros corrugatus	HM755883.1	N	Rainforest	Day	Y	2688.5	55	7.89674	4.00733	3.34081	0.666527	94	0.959184
Cacatuidae	Psittaciformes	Cacatua moluccensis	JF414239	N	Arboreal	Day	Y	512	40.8072	6.23832	3.70886	3.00554	0.703317	95	0.969388
Bucerotidae_Y	Coraciiformes	Aceros waldeni	HQ834450.1	Y	Rainforest	Day	Y	655.25	45	6.48502	3.80666	3.05541	0.751249	96	0.979592
Hydrobatidae	Procellariiformes	Pelagodroma marina	KC875856.1	Y	Seabird	Day	Y	44	27.8	3.78419	3.32504	2.50942	0.815621	97	0.989796
Phoenicopteridae	Phoenicopteriformes	Phoenicopterus ruber roseus	EF532932.1	Y	Wader	Day	Y	2240	66.5	7.71423	4.1972	3.30391	0.893292	98	1

## Sheet: Chi
SL=	9					SL=	15
LL=	10					LL=	10
	YCR+	YCR-					YCR+	YCR-
SL	1	9				SL	2	13
LL	5	5				LL	5	5
Fisher's exact test					Fisher's exact test
The two-tailed P value equals 0.1409					The two-tailed P value equals 0.0752

## Sheet: Rankings
Family	Order	YCR_GENUS	Type	Active	Flight	Avg weight	Max age*	LnM	LnAMLS	Predicted Y	Residuals	Nonsplit rank	Split Absolute Rank	Split Rank	Shift (in comparison to non split)	Shift (comparision between + & -)	Avg +Rank	Avg -Rank	Avg +Rank	Avg -Rank
Ardeidae_N	Pelecaniformes	N	Seabird	Day	Y	453.333	10.5	6.11663	2.35138	2.98094	-0.629564	0.413043	4	0.0408163	down	lower	0.855442	0.680272	83.8333	66.6667
Ardeidae_Y	Pelecaniformes	Y	Seabird	Day	Y	511.278	21.8622	6.23691	3.08476	3.00526	0.0795033	0.413043	57	0.581633	up	higher
Bucerotidae_N	Coraciiformes	N	Rainforest	Day	Y	2688.5	55	7.89674	4.00733	3.34081	0.666527	0.945652	94	0.959184	up	lower
Bucerotidae_Y	Coraciiformes	Y	Rainforest	Day	Y	655.25	45	6.48502	3.80666	3.05541	0.751249	0.945652	96	0.979592	up	higher
Petroicidae_N	Passeriformes	N	Passerine	Day	Y	18.1667	16.963	2.89959	2.83103	2.33058	0.50045	0.923913	90	0.918367	down	higher
Petroicidae_Y	Passeriformes	Y	Passerine	Day	Y	11.6667	12.0698	2.45674	2.49071	2.24106	0.249653	0.923913	79	0.806122	down	lower
Psittacidae_N	Psittaciformes	N	Arboreal	Day	Y	194.091	23.39	5.26833	3.15231	2.80945	0.342861	0.956522	88	0.897959	down	lower
Psittacidae_Y	Psittaciformes	Y	Arboreal	Day	Y	393.625	37.1222	5.9754	3.61422	2.95239	0.661827	0.956522	93	0.94898	down	higher
Psittaculidae_N	Psittaciformes	N	Arboreal	Day	Y	48.3333	16.5	3.87812	2.80336	2.5284	0.274956	0.913043	85	0.867347	down	lower
Psittaculidae_Y	Psittaciformes	Y	Arboreal	Day	Y	30	21	3.4012	3.04452	2.43199	0.612533	0.913043	92	0.938776	up	higher
Turdidae_N	Passeriformes	N	Passerine	Day	Y	59.6667	12.1076	4.08877	2.49384	2.57099	-0.0771526	0.434783	39	0.397959	up	lower
Turdidae_Y	Passeriformes	N	Passerine	Day	Y	68	18	4.21951	2.89037	2.59742	0.292953	0.434783	86	0.877551	down	higher
																5 out of 6 - families lower than +
