# Supplementary material for: Duplication of the mitochondrial control region is associated with increased longevity in birds
Source: publisher site journal article supplement (doi:10.18632/aging.101012), 2016-08-11
Supplement: Supplementary file 9 [file aging-v8i8-101012-supplementary-material-SD4.xlsx]

## Sheet: Modules
Species pairs	Alignment differences	Residual differences	actual residual value
Ceryle_rud|Caprimulgu	0.218	2.03097	-2.03097
Ceryle_rud|Cacatua_mo	0.227	1.95579	-1.95579
Ceryle_rud|Amazona_ba	0.221	1.91369	-1.91369
Ceryle_rud|Melopsitta	0.217	1.85842	-1.85842
Ceryle_rud|Phodilus_b	0.222	1.80965	-1.80965
Ceryle_rud|Aegotheles	0.203	1.73196	-1.73196
Ceryle_rud|Brotogeris	0.222	1.58007	-1.58007
Ceryle_rud|Pelecanus_	0.189	1.52233	-1.52233
Ceryle_rud|Agapornis_	0.236	1.52195	-1.52195
Ceryle_rud|Larus_domi	0.187	1.5102	-1.5102
Ceryle_rud|Pandion_ha	0.2	1.49787	-1.49787
Gallus_gal|Caprimulgu	0.235	1.47937	-1.47937
Coturnix_j|Caprimulgu	0.239	1.47937	-1.47937
Casuarius_|Caprimulgu	0.244	1.45726	-1.45726
Ceryle_rud|Phaethon_r	0.2	1.45626	-1.45626
Gallus_gal|Aceros_wal	0.223	1.45269	-1.45269
Coturnix_j|Aceros_wal	0.229	1.45269	-1.45269
Casuarius_|Aceros_wal	0.227	1.43059	-1.43059
Gallus_gal|Cacatua_mo	0.239	1.40419	-1.40419
Coturnix_j|Cacatua_mo	0.248	1.40419	-1.40419
Ceryle_rud|Balaenicep	0.232	1.38337	-1.38337
Casuarius_|Cacatua_mo	0.245	1.38209	-1.38209
Ceryle_rud|Haematopus	0.186	1.37299	-1.37299
Gallus_gal|Aceros_cor	0.222	1.37125	-1.37125
Coturnix_j|Aceros_cor	0.232	1.37125	-1.37125
Eudynamys_|Caprimulgu	0.218	1.36691	-1.36691
Gallus_gal|Amazona_ba	0.236	1.36209	-1.36209
Coturnix_j|Amazona_ba	0.237	1.36209	-1.36209
Colinus_vi|Caprimulgu	0.237	1.36173	-1.36173
Ceryle_rud|Nipponia_n	0.18	1.36031	-1.36031
Casuarius_|Aceros_cor	0.227	1.34915	-1.34915
Ceryle_rud|Morus_serr	0.187	1.34257	-1.34257
Eudynamys_|Aceros_wal	0.208	1.34024	-1.34024
Casuarius_|Amazona_ba	0.245	1.33999	-1.33999
Colinus_vi|Aceros_wal	0.225	1.33505	-1.33505
Ceryle_rud|Botaurus_s	0.19	1.33198	-1.33198
Ceryle_rud|Vanellus_v	0.19	1.33063	-1.33063
Ceryle_rud|Grus_grus_	0.183	1.33058	-1.33058
Tachybaptu|Phoenicopt	0.125	1.32004	-1.32004
Ceryle_rud|Bubo_bubo_	0.227	1.31498	-1.31498
Gallus_gal|Melopsitta	0.228	1.30682	-1.30682
Coturnix_j|Melopsitta	0.23	1.30682	-1.30682
Todiramphu|Caprimulgu	0.218	1.29876	-1.29876
Eudynamys_|Cacatua_mo	0.224	1.29173	-1.29173
Colinus_vi|Cacatua_mo	0.247	1.28655	-1.28655
Eurystomus|Caprimulgu	0.218	1.286	-1.286
Casuarius_|Melopsitta	0.234	1.28472	-1.28472
Ceryle_rud|Arenaria_i	0.19	1.28034	-1.28034
Ceryle_rud|Columba_li	0.198	1.26314	-1.26314
Eudynamys_|Aceros_cor	0.209	1.25879	-1.25879
Gallus_gal|Phodilus_b	0.231	1.25805	-1.25805
Coturnix_j|Phodilus_b	0.236	1.25805	-1.25805
Colinus_vi|Aceros_cor	0.226	1.25361	-1.25361
Eudynamys_|Amazona_ba	0.222	1.24963	-1.24963
Colinus_vi|Amazona_ba	0.231	1.24445	-1.24445
Casuarius_|Phodilus_b	0.236	1.23595	-1.23595
Tachybaptu|Pelagodrom	0.152	1.23324	-1.23324
Ceryle_rud|Synthlibor	0.186	1.22801	-1.22801
Todiramphu|Cacatua_mo	0.225	1.22358	-1.22358
Eurystomus|Cacatua_mo	0.231	1.21083	-1.21083
Tachybaptu|Caprimulgu	0.198	1.20181	-1.20181
Eudynamys_|Melopsitta	0.214	1.19436	-1.19436
Gallus_gal|Tregellasi	0.245	1.19357	-1.19357
Coturnix_j|Tregellasi	0.249	1.19357	-1.19357
Colinus_vi|Melopsitta	0.23	1.18918	-1.18918
Todiramphu|Amazona_ba	0.221	1.18148	-1.18148
Gallus_gal|Aegotheles	0.224	1.18036	-1.18036
Coturnix_j|Aegotheles	0.231	1.18036	-1.18036
Fulica_atr|Caprimulgu	0.224	1.17792	-1.17792
Tachybaptu|Aceros_wal	0.178	1.17514	-1.17514
Ceryle_rud|Buteo_bute	0.197	1.17509	-1.17509
Casuarius_|Tregellasi	0.247	1.17147	-1.17147
Eurystomus|Amazona_ba	0.224	1.16873	-1.16873
Casuarius_|Aegotheles	0.219	1.15826	-1.15826
Ceryle_rud|Otis_tarda	0.19	1.15511	-1.15511
Acanthisit|Caprimulgu	0.236	1.15169	-1.15169
Fulica_atr|Aceros_wal	0.204	1.15125	-1.15125
Thraupis_e|Caprimulgu	0.244	1.14896	-1.14896
Eudynamys_|Phodilus_b	0.219	1.14559	-1.14559
Colinus_vi|Phodilus_b	0.236	1.14041	-1.14041
Eudyptes_c|Phoenicopt	0.132	1.13305	-1.13305
Tachybaptu|Cacatua_mo	0.199	1.12664	-1.12664
Todiramphu|Melopsitta	0.212	1.12621	-1.12621
Acanthisit|Aceros_wal	0.216	1.12502	-1.12502
Thraupis_e|Aceros_wal	0.226	1.12229	-1.12229
Eurystomus|Melopsitta	0.215	1.11346	-1.11346
Dupetor_fl|Aegotheles	0.188	1.10933	-1.10933
Fulica_atr|Cacatua_mo	0.229	1.10274	-1.10274
Tachybaptu|Aceros_cor	0.179	1.0937	-1.0937
Tachybaptu|Amazona_ba	0.194	1.08454	-1.08454
Ceryle_rud|Falco_pere	0.213	1.08449	-1.08449
Eudynamys_|Tregellasi	0.228	1.08111	-1.08111
Todiramphu|Phodilus_b	0.216	1.07744	-1.07744
Acanthisit|Cacatua_mo	0.242	1.07651	-1.07651
Colinus_vi|Tregellasi	0.255	1.07593	-1.07593
Thraupis_e|Cacatua_mo	0.248	1.07378	-1.07378
Alectura_l|Caprimulgu	0.238	1.0723	-1.0723
Fulica_atr|Aceros_cor	0.209	1.0698	-1.0698
Eudynamys_|Aegotheles	0.197	1.0679	-1.0679
Eurystomus|Phodilus_b	0.221	1.06469	-1.06469
Colinus_vi|Aegotheles	0.226	1.06272	-1.06272
Regulus_ca|Caprimulgu	0.25	1.06175	-1.06175
Fulica_atr|Amazona_ba	0.221	1.06064	-1.06064
Dryocopus_|Caprimulgu	0.238	1.05234	-1.05234
Crax_rubra|Caprimulgu	0.231	1.05213	-1.05213
Gavia_stel|Phoenicopt	0.131	1.0463	-1.0463
Eudyptes_c|Pelagodrom	0.147	1.04626	-1.04626
Alectura_l|Aceros_wal	0.223	1.04563	-1.04563
Acanthisit|Aceros_cor	0.22	1.04357	-1.04357
Thraupis_e|Aceros_cor	0.225	1.04084	-1.04084
Regulus_ca|Aceros_wal	0.237	1.03508	-1.03508
Acanthisit|Amazona_ba	0.238	1.03441	-1.03441
Thraupis_e|Amazona_ba	0.24	1.03168	-1.03168
Tachybaptu|Melopsitta	0.19	1.02927	-1.02927
Gallus_gal|Brotogeris	0.236	1.02846	-1.02846
Coturnix_j|Brotogeris	0.24	1.02846	-1.02846
Dryocopus_|Aceros_wal	0.221	1.02567	-1.02567
Crax_rubra|Aceros_wal	0.215	1.02546	-1.02546
Alauda_arv|Caprimulgu	0.247	1.02305	-1.02305
Remiz_cons|Caprimulgu	0.242	1.01518	-1.01518
Eudyptes_c|Caprimulgu	0.2	1.01483	-1.01483
Lanius_tep|Caprimulgu	0.257	1.00978	-1.00978
Casuarius_|Brotogeris	0.243	1.00636	-1.00636
Fulica_atr|Melopsitta	0.211	1.00537	-1.00537
Sitta_caro|Caprimulgu	0.245	1.00263	-1.00263
Jacana_jac|Aegotheles	0.199	1.00103	-1.00103
Todiramphu|Aegotheles	0.207	0.99975	-0.99975
Alectura_l|Cacatua_mo	0.247	0.997124	-0.997124
Alauda_arv|Aceros_wal	0.233	0.996381	-0.996381
Remiz_cons|Aceros_wal	0.22	0.988509	-0.988509
Eudyptes_c|Aceros_wal	0.178	0.988157	-0.988157
Eurystomus|Aegotheles	0.209	0.986999	-0.986999
Regulus_ca|Cacatua_mo	0.261	0.986572	-0.986572
Lanius_tep|Aceros_wal	0.247	0.983105	-0.983105
Tachybaptu|Phodilus_b	0.192	0.980496	-0.980496
Acanthisit|Melopsitta	0.233	0.979142	-0.979142
Gallus_gal|Bycanistes	0.218	0.977228	-0.977228
Coturnix_j|Bycanistes	0.223	0.977228	-0.977228
Dryocopus_|Cacatua_mo	0.249	0.977163	-0.977163
Crax_rubra|Cacatua_mo	0.237	0.976958	-0.976958
Thraupis_e|Melopsitta	0.231	0.976411	-0.976411
Sitta_caro|Aceros_wal	0.229	0.97596	-0.97596
Gallus_gal|Pelecanus_	0.212	0.970727	-0.970727
Coturnix_j|Pelecanus_	0.224	0.970727	-0.970727
Gallus_gal|Agapornis_	0.246	0.970349	-0.970349
Coturnix_j|Agapornis_	0.251	0.970349	-0.970349
Mionectes_|Caprimulgu	0.242	0.969616	-0.969616
Ceryle_rud|Phalacroco	0.195	0.966432	-0.966432
Alectura_l|Aceros_cor	0.223	0.964184	-0.964184
Gavia_stel|Pelagodrom	0.148	0.959501	-0.959501
Henicorhin|Caprimulgu	0.245	0.958858	-0.958858
Gallus_gal|Larus_domi	0.21	0.958594	-0.958594
Coturnix_j|Larus_domi	0.217	0.958594	-0.958594
Fulica_atr|Phodilus_b	0.22	0.956602	-0.956602
Casuarius_|Bycanistes	0.224	0.955127	-0.955127
Alectura_l|Amazona_ba	0.239	0.955023	-0.955023
Regulus_ca|Aceros_cor	0.239	0.953632	-0.953632
Casuarius_|Pelecanus_	0.212	0.948626	-0.948626
Casuarius_|Agapornis_	0.256	0.948248	-0.948248
Alauda_arv|Cacatua_mo	0.256	0.947876	-0.947876
Gallus_gal|Pandion_ha	0.228	0.946262	-0.946262
Coturnix_j|Pandion_ha	0.228	0.946262	-0.946262
Gallus_gal|Apus_apus_	0.211	0.946079	-0.946079
Coturnix_j|Apus_apus_	0.217	0.946079	-0.946079
Regulus_ca|Amazona_ba	0.252	0.944471	-0.944471
Dryocopus_|Aceros_cor	0.222	0.944223	-0.944223
Crax_rubra|Aceros_cor	0.217	0.944018	-0.944018
Mionectes_|Aceros_wal	0.227	0.942946	-0.942946
Gallus_gal|Petroica_b	0.242	0.941746	-0.941746
Coturnix_j|Petroica_b	0.252	0.941746	-0.941746
Anser_albi|Caprimulgu	0.238	0.940631	-0.940631
Remiz_cons|Cacatua_mo	0.246	0.940005	-0.940005
Eudyptes_c|Cacatua_mo	0.208	0.939652	-0.939652
Casuarius_|Larus_domi	0.21	0.936493	-0.936493
Dryocopus_|Amazona_ba	0.243	0.935063	-0.935063
Crax_rubra|Amazona_ba	0.229	0.934857	-0.934857
Lanius_tep|Cacatua_mo	0.267	0.9346	-0.9346
Henicorhin|Aceros_wal	0.232	0.932188	-0.932188
Acanthisit|Phodilus_b	0.237	0.930371	-0.930371
Gavia_stel|Caprimulgu	0.202	0.92807	-0.92807
Thraupis_e|Phodilus_b	0.239	0.92764	-0.92764
Sitta_caro|Cacatua_mo	0.249	0.927455	-0.927455
Casuarius_|Pandion_ha	0.222	0.92416	-0.92416
Casuarius_|Apus_apus_	0.207	0.923978	-0.923978
Cardinalis|Caprimulgu	0.251	0.923174	-0.923174
Casuarius_|Petroica_b	0.242	0.919645	-0.919645
Tachybaptu|Tregellasi	0.217	0.91602	-0.91602
Eudynamys_|Brotogeris	0.223	0.916004	-0.916004
Alauda_arv|Aceros_cor	0.234	0.914936	-0.914936
Anser_albi|Aceros_wal	0.222	0.91396	-0.91396
Colinus_vi|Brotogeris	0.239	0.910821	-0.910821
Bombycilla|Caprimulgu	0.251	0.907156	-0.907156
Remiz_cons|Aceros_cor	0.219	0.907065	-0.907065
Eudyptes_c|Aceros_cor	0.18	0.906712	-0.906712
Alauda_arv|Amazona_ba	0.243	0.905775	-0.905775
Gallus_gal|Phaethon_r	0.221	0.904659	-0.904659
Coturnix_j|Phaethon_r	0.232	0.904659	-0.904659
Gallus_gal|Sturnus_se	0.241	0.903142	-0.903142
Coturnix_j|Sturnus_se	0.241	0.903142	-0.903142
Tachybaptu|Aegotheles	0.18	0.902808	-0.902808
Lanius_tep|Aceros_cor	0.248	0.90166	-0.90166
Gavia_stel|Aceros_wal	0.186	0.9014	-0.9014
Alectura_l|Melopsitta	0.237	0.899752	-0.899752
Dupetor_fl|Pelecanus_	0.18	0.899702	-0.899702
Remiz_cons|Amazona_ba	0.235	0.897904	-0.897904
Eudyptes_c|Amazona_ba	0.2	0.897551	-0.897551
Cardinalis|Aceros_wal	0.236	0.896504	-0.896504
Ceryle_rud|Sagittariu	0.197	0.895449	-0.895449
Megalurus_|Caprimulgu	0.244	0.894594	-0.894594
Sitta_caro|Aceros_cor	0.231	0.894515	-0.894515
Mionectes_|Cacatua_mo	0.254	0.894441	-0.894441
Anhinga_ru|Aegotheles	0.193	0.893026	-0.893026
Lanius_tep|Amazona_ba	0.248	0.892499	-0.892499
Fulica_atr|Tregellasi	0.233	0.892125	-0.892125
Regulus_ca|Melopsitta	0.242	0.889201	-0.889201
Sitta_caro|Amazona_ba	0.24	0.885354	-0.885354
Henicorhin|Cacatua_mo	0.254	0.883683	-0.883683
Casuarius_|Phaethon_r	0.22	0.882558	-0.882558
Casuarius_|Sturnus_se	0.241	0.88104	-0.88104
Bombycilla|Aceros_wal	0.237	0.880486	-0.880486
Dryocopus_|Melopsitta	0.232	0.879792	-0.879792
Crax_rubra|Melopsitta	0.226	0.879586	-0.879586
Fulica_atr|Aegotheles	0.205	0.878914	-0.878914
Agelaius_p|Caprimulgu	0.243	0.86848	-0.86848
Megalurus_|Aceros_wal	0.232	0.867923	-0.867923
Anser_albi|Cacatua_mo	0.246	0.865455	-0.865455
Eudynamys_|Bycanistes	0.204	0.86477	-0.86477
Thraupis_e|Tregellasi	0.17	0.863163	-0.863163
Mionectes_|Aceros_cor	0.227	0.861501	-0.861501
Colinus_vi|Bycanistes	0.223	0.859588	-0.859588
Eudynamys_|Pelecanus_	0.184	0.85827	-0.85827
Eudynamys_|Agapornis_	0.234	0.857892	-0.857892
Colinus_vi|Pelecanus_	0.22	0.853087	-0.853087
Gavia_stel|Cacatua_mo	0.199	0.852895	-0.852895
Colinus_vi|Agapornis_	0.244	0.852709	-0.852709
Acanthisit|Aegotheles	0.221	0.852683	-0.852683
Mionectes_|Amazona_ba	0.245	0.85234	-0.85234
Alectura_l|Phodilus_b	0.235	0.850982	-0.850982
Henicorhin|Aceros_cor	0.232	0.850743	-0.850743
Gallus_gal|Anseranas_	0.192	0.850679	-0.850679
Coturnix_j|Anseranas_	0.199	0.850679	-0.850679
Alauda_arv|Melopsitta	0.235	0.850505	-0.850505
Thraupis_e|Aegotheles	0.233	0.849952	-0.849952
Cardinalis|Cacatua_mo	0.256	0.847999	-0.847999
Todiramphu|Brotogeris	0.218	0.847852	-0.847852
Eudynamys_|Larus_domi	0.188	0.846137	-0.846137
Remiz_cons|Melopsitta	0.234	0.842633	-0.842633
Eudyptes_c|Melopsitta	0.19	0.842281	-0.842281
Agelaius_p|Aceros_wal	0.227	0.84181	-0.84181
Henicorhin|Amazona_ba	0.247	0.841582	-0.841582
Colinus_vi|Larus_domi	0.218	0.840954	-0.840954
Regulus_ca|Phodilus_b	0.255	0.84043	-0.84043
Taeniopygi|Caprimulgu	0.238	0.83943	-0.83943
Gallus_gal|Archilochu	0.233	0.839212	-0.839212
Coturnix_j|Archilochu	0.236	0.839212	-0.839212
Ceryle_rud|Anhinga_ru	0.195	0.838938	-0.838938
Gallus_gal|Himatione_	0.244	0.83848	-0.83848
Coturnix_j|Himatione_	0.249	0.83848	-0.83848
Lanius_tep|Melopsitta	0.246	0.837229	-0.837229
Sagittariu|Aegotheles	0.192	0.836514	-0.836514
Turdus_hor|Caprimulgu	0.247	0.835421	-0.835421
Eurystomus|Brotogeris	0.224	0.835101	-0.835101
Eudynamys_|Pandion_ha	0.2	0.833804	-0.833804
Anser_albi|Aceros_cor	0.224	0.832516	-0.832516
Bombycilla|Cacatua_mo	0.266	0.831981	-0.831981
Gallus_gal|Balaenicep	0.258	0.831761	-0.831761
Coturnix_j|Balaenicep	0.263	0.831761	-0.831761
Dryocopus_|Phodilus_b	0.24	0.831021	-0.831021
Crax_rubra|Phodilus_b	0.23	0.830816	-0.830816
Sitta_caro|Melopsitta	0.23	0.830083	-0.830083
Eudynamys_|Petroica_b	0.23	0.829288	-0.829288
Colinus_vi|Pandion_ha	0.235	0.828622	-0.828622
Colinus_vi|Apus_apus_	0.216	0.82844	-0.82844
Gallus_gal|Aegithalos	0.247	0.825926	-0.825926
Coturnix_j|Aegithalos	0.252	0.825926	-0.825926
Colinus_vi|Petroica_b	0.25	0.824106	-0.824106
Anser_albi|Amazona_ba	0.24	0.823355	-0.823355
Gallus_gal|Haematopus	0.208	0.821383	-0.821383
Coturnix_j|Haematopus	0.214	0.821383	-0.821383
Vireo_oliv|Caprimulgu	0.24	0.820995	-0.820995
Gavia_stel|Aceros_cor	0.183	0.819955	-0.819955
Megalurus_|Cacatua_mo	0.248	0.819418	-0.819418
Casuarius_|Archilochu	0.229	0.817111	-0.817111
Casuarius_|Himatione_	0.241	0.816379	-0.816379
Cardinalis|Aceros_cor	0.233	0.815059	-0.815059
Gallus_gal|Phylloscop	0.236	0.814566	-0.814566
Coturnix_j|Phylloscop	0.248	0.814566	-0.814566
Ciconia_ci|Phoenicopt	0.13	0.814556	-0.814556
Gallus_gal|Oriolus_ch	0.254	0.813711	-0.813711
Coturnix_j|Oriolus_ch	0.253	0.813711	-0.813711
Taeniopygi|Aceros_wal	0.222	0.81276	-0.81276
Gavia_stel|Amazona_ba	0.194	0.810794	-0.810794
Casuarius_|Balaenicep	0.257	0.80966	-0.80966
Turdus_hor|Aceros_wal	0.229	0.808751	-0.808751
Gallus_gal|Nipponia_n	0.211	0.80871	-0.80871
Coturnix_j|Nipponia_n	0.214	0.80871	-0.80871
Cardinalis|Amazona_ba	0.245	0.805898	-0.805898
Casuarius_|Aegithalos	0.247	0.803825	-0.803825
Alauda_arv|Phodilus_b	0.243	0.801734	-0.801734
Casuarius_|Haematopus	0.205	0.799282	-0.799282
Bombycilla|Aceros_cor	0.242	0.799041	-0.799041
Mionectes_|Melopsitta	0.233	0.79707	-0.79707
Vireo_oliv|Aceros_wal	0.227	0.794324	-0.794324
Remiz_cons|Phodilus_b	0.233	0.793863	-0.793863
Eudyptes_c|Phodilus_b	0.194	0.79351	-0.79351
Agelaius_p|Cacatua_mo	0.246	0.793305	-0.793305
Casuarius_|Phylloscop	0.241	0.792464	-0.792464
Eudynamys_|Phaethon_r	0.199	0.792202	-0.792202
Gallus_gal|Passer_mon	0.241	0.791871	-0.791871
Coturnix_j|Passer_mon	0.245	0.791871	-0.791871
Casuarius_|Oriolus_ch	0.251	0.79161	-0.79161
Jacana_jac|Pelecanus_	0.181	0.791398	-0.791398
Gallus_gal|Morus_serr	0.214	0.790965	-0.790965
Coturnix_j|Morus_serr	0.217	0.790965	-0.790965
Eudynamys_|Sturnus_se	0.23	0.790684	-0.790684
Gallus_gal|Garrulus_g	0.246	0.790666	-0.790666
Coturnix_j|Garrulus_g	0.248	0.790666	-0.790666
Todiramphu|Pelecanus_	0.195	0.790117	-0.790117
Pterogloss|Caprimulgu	0.239	0.78994	-0.78994
Bombycilla|Amazona_ba	0.25	0.78988	-0.78988
Todiramphu|Agapornis_	0.231	0.789739	-0.789739
Lanius_tep|Phodilus_b	0.259	0.788458	-0.788458
Colinus_vi|Phaethon_r	0.225	0.787019	-0.787019
Casuarius_|Nipponia_n	0.204	0.786609	-0.786609
Alectura_l|Tregellasi	0.246	0.786505	-0.786505
Megalurus_|Aceros_cor	0.233	0.786478	-0.786478
Henicorhin|Melopsitta	0.242	0.786312	-0.786312
Colinus_vi|Sturnus_se	0.244	0.785502	-0.785502
Sitta_caro|Phodilus_b	0.24	0.781313	-0.781313
Gallus_gal|Pseudopodo	0.232	0.781132	-0.781132
Coturnix_j|Pseudopodo	0.237	0.781132	-0.781132
Gallus_gal|Botaurus_s	0.217	0.780373	-0.780373
Coturnix_j|Botaurus_s	0.22	0.780373	-0.780373
Gallus_gal|Sylvia_atr	0.25	0.779389	-0.779389
Coturnix_j|Sylvia_atr	0.256	0.779389	-0.779389
Jacana_jac|Larus_domi	0.17	0.779264	-0.779264
Gallus_gal|Vanellus_v	0.207	0.779024	-0.779024
Coturnix_j|Vanellus_v	0.214	0.779024	-0.779024
Gallus_gal|Grus_grus_	0.209	0.778978	-0.778978
Coturnix_j|Grus_grus_	0.212	0.778978	-0.778978
Todiramphu|Larus_domi	0.192	0.777984	-0.777984
Eurystomus|Pelecanus_	0.197	0.777367	-0.777367
Megalurus_|Amazona_ba	0.238	0.777317	-0.777317
Eurystomus|Agapornis_	0.233	0.776988	-0.776988
Regulus_ca|Tregellasi	0.187	0.775953	-0.775953
Fringilla_|Caprimulgu	0.242	0.774606	-0.774606
Pycnonotus|Caprimulgu	0.245	0.77346	-0.77346
Alectura_l|Aegotheles	0.225	0.773294	-0.773294
Casuarius_|Passer_mon	0.249	0.76977	-0.76977
Casuarius_|Morus_serr	0.209	0.768864	-0.768864
Casuarius_|Garrulus_g	0.241	0.768564	-0.768564
Anser_albi|Melopsitta	0.232	0.768084	-0.768084
Crax_rubra|Tregellasi	0.24	0.766339	-0.766339
Todiramphu|Pandion_ha	0.203	0.765652	-0.765652
Phalacroco|Aegotheles	0.187	0.765532	-0.765532
Eurystomus|Larus_domi	0.194	0.765233	-0.765233
Acrocephal|Caprimulgu	0.247	0.765095	-0.765095
Taeniopygi|Cacatua_mo	0.25	0.764255	-0.764255
Gallus_gal|Bubo_bubo_	0.239	0.763379	-0.763379
Coturnix_j|Bubo_bubo_	0.245	0.763379	-0.763379
Pterogloss|Aceros_wal	0.22	0.76327	-0.76327
Tachybaptu|Thalassarc	0.153	0.762988	-0.762988
Regulus_ca|Aegotheles	0.245	0.762742	-0.762742
Dupetor_fl|Balaenicep	0.214	0.760736	-0.760736
Agelaius_p|Aceros_cor	0.226	0.760365	-0.760365
Turdus_hor|Cacatua_mo	0.258	0.760246	-0.760246
Apteryx_ha|Caprimulgu	0.246	0.760051	-0.760051
Casuarius_|Pseudopodo	0.238	0.759031	-0.759031
Casuarius_|Botaurus_s	0.212	0.758271	-0.758271
Casuarius_|Sylvia_atr	0.249	0.757288	-0.757288
Casuarius_|Vanellus_v	0.208	0.756923	-0.756923
Casuarius_|Grus_grus_	0.201	0.756877	-0.756877
Gavia_stel|Melopsitta	0.19	0.755523	-0.755523
Dryocopus_|Aegotheles	0.228	0.753333	-0.753333
Crax_rubra|Aegotheles	0.219	0.753128	-0.753128
Eurystomus|Pandion_ha	0.211	0.752901	-0.752901
Agelaius_p|Amazona_ba	0.238	0.751204	-0.751204
Tachybaptu|Brotogeris	0.197	0.75091	-0.75091
Cardinalis|Melopsitta	0.243	0.750627	-0.750627
Mionectes_|Phodilus_b	0.243	0.748299	-0.748299
Fringilla_|Aceros_wal	0.227	0.747936	-0.747936
Cecropis_d|Caprimulgu	0.244	0.747255	-0.747255
Pycnonotus|Aceros_wal	0.225	0.74679	-0.74679
Vireo_oliv|Cacatua_mo	0.245	0.74582	-0.74582
Ceryle_rud|Eurystomus	0.2	0.744964	-0.744964
Gallus_gal|Luscinia_c	0.229	0.74298	-0.74298
Coturnix_j|Luscinia_c	0.236	0.74298	-0.74298
Casuarius_|Bubo_bubo_	0.244	0.741277	-0.741277
Acrocephal|Aceros_wal	0.235	0.738425	-0.738425
Dupetor_fl|Nipponia_n	0.17	0.737684	-0.737684
Henicorhin|Phodilus_b	0.247	0.737541	-0.737541
Alauda_arv|Tregellasi	0.179	0.737257	-0.737257
Luscinia_c|Caprimulgu	0.233	0.736385	-0.736385
Bombycilla|Melopsitta	0.244	0.73461	-0.73461
Apteryx_ha|Aceros_wal	0.228	0.733381	-0.733381
Colinus_vi|Anseranas_	0.199	0.733039	-0.733039
Ceryle_rud|Todiramphu	0.158	0.732214	-0.732214
Gallus_gal|Cecropis_d	0.241	0.73211	-0.73211
Coturnix_j|Cecropis_d	0.246	0.73211	-0.73211
Taeniopygi|Aceros_cor	0.223	0.731315	-0.731315
Ceryle_rud|Jacana_jac	0.196	0.730934	-0.730934
Remiz_cons|Tregellasi	0.173	0.729386	-0.729386
Eudyptes_c|Tregellasi	0.217	0.729033	-0.729033
Gallus_gal|Arenaria_i	0.214	0.728738	-0.728738
Coturnix_j|Arenaria_i	0.215	0.728738	-0.728738
Ciconia_ci|Pelagodrom	0.147	0.727761	-0.727761
Turdus_hor|Aceros_cor	0.227	0.727306	-0.727306
Fulica_atr|Brotogeris	0.219	0.727016	-0.727016
Eudynamys_|Himatione_	0.235	0.726023	-0.726023
Todiramphu|Phaethon_r	0.199	0.724049	-0.724049
Alauda_arv|Aegotheles	0.233	0.724046	-0.724046
Lanius_tep|Tregellasi	0.187	0.723981	-0.723981
Taeniopygi|Amazona_ba	0.237	0.722154	-0.722154
Megalurus_|Melopsitta	0.232	0.722047	-0.722047
Colinus_vi|Archilochu	0.235	0.721572	-0.721572
Casuarius_|Luscinia_c	0.237	0.720879	-0.720879
Colinus_vi|Himatione_	0.246	0.72084	-0.72084
Cecropis_d|Aceros_wal	0.235	0.720585	-0.720585
Gallus_gal|Apteryx_ha	0.232	0.719314	-0.719314
Coturnix_j|Apteryx_ha	0.233	0.719314	-0.719314
Anser_albi|Phodilus_b	0.232	0.719313	-0.719313
Eudynamys_|Balaenicep	0.228	0.719304	-0.719304
Turdus_hor|Amazona_ba	0.245	0.718145	-0.718145
Sitta_caro|Tregellasi	0.175	0.716836	-0.716836
Remiz_cons|Aegotheles	0.234	0.716174	-0.716174
Bubo_bubo_|Caprimulgu	0.177	0.715987	-0.715987
Eudyptes_c|Aegotheles	0.174	0.715822	-0.715822
Pterogloss|Cacatua_mo	0.248	0.714765	-0.714765
Gallus_gal|Acrocephal	0.247	0.71427	-0.71427
Coturnix_j|Acrocephal	0.249	0.71427	-0.71427
Colinus_vi|Balaenicep	0.264	0.714122	-0.714122
Eudynamys_|Aegithalos	0.237	0.713469	-0.713469
Vireo_oliv|Aceros_cor	0.229	0.71288	-0.71288
Gallus_gal|Columba_li	0.214	0.711537	-0.711537
Coturnix_j|Columba_li	0.223	0.711537	-0.711537
Eurystomus|Phaethon_r	0.205	0.711298	-0.711298
Lanius_tep|Aegotheles	0.248	0.71077	-0.71077
Casuarius_|Cecropis_d	0.243	0.710009	-0.710009
Luscinia_c|Aceros_wal	0.223	0.709714	-0.709714
Dupetor_fl|Botaurus_s	0.106	0.709347	-0.709347
Eudynamys_|Haematopus	0.183	0.708926	-0.708926
Colinus_vi|Aegithalos	0.252	0.708286	-0.708286
Dupetor_fl|Grus_grus_	0.168	0.707952	-0.707952
Gavia_stel|Phodilus_b	0.201	0.706753	-0.706753
Casuarius_|Arenaria_i	0.206	0.706637	-0.706637
Gallus_gal|Pycnonotus	0.237	0.705905	-0.705905
Coturnix_j|Pycnonotus	0.243	0.705905	-0.705905
Gallus_gal|Fringilla_	0.233	0.704759	-0.704759
Coturnix_j|Fringilla_	0.243	0.704759	-0.704759
Colinus_vi|Haematopus	0.214	0.703743	-0.703743
Vireo_oliv|Amazona_ba	0.231	0.703719	-0.703719
Sitta_caro|Aegotheles	0.237	0.703625	-0.703625
Eudynamys_|Phylloscop	0.229	0.702108	-0.702108
Cardinalis|Phodilus_b	0.247	0.701857	-0.701857
Eudynamys_|Oriolus_ch	0.238	0.701254	-0.701254
Acanthisit|Brotogeris	0.236	0.700785	-0.700785
Sylvia_atr|Caprimulgu	0.253	0.699976	-0.699976
Tachybaptu|Bycanistes	0.174	0.699676	-0.699676
Fringilla_|Cacatua_mo	0.249	0.699431	-0.699431
Pycnonotus|Cacatua_mo	0.256	0.698285	-0.698285
Pseudopodo|Caprimulgu	0.238	0.698233	-0.698233
Thraupis_e|Brotogeris	0.236	0.698054	-0.698054
Colinus_vi|Phylloscop	0.243	0.696926	-0.696926
Ciconia_ci|Caprimulgu	0.2	0.69633	-0.69633
Eudynamys_|Nipponia_n	0.183	0.696252	-0.696252
Colinus_vi|Oriolus_ch	0.253	0.696071	-0.696071
Agelaius_p|Melopsitta	0.234	0.695934	-0.695934
Tachybaptu|Pelecanus_	0.162	0.693176	-0.693176
Tachybaptu|Agapornis_	0.211	0.692797	-0.692797
Casuarius_|Acrocephal	0.249	0.692169	-0.692169
Colinus_vi|Nipponia_n	0.212	0.69107	-0.69107
Acrocephal|Cacatua_mo	0.259	0.68992	-0.68992
Casuarius_|Columba_li	0.217	0.689436	-0.689436
Gallus_gal|Pterogloss	0.241	0.689425	-0.689425
Coturnix_j|Pterogloss	0.247	0.689425	-0.689425
Garrulus_g|Caprimulgu	0.25	0.688699	-0.688699
Tachybaptu|Cathartes_	0.153	0.687887	-0.687887
Passer_mon|Caprimulgu	0.241	0.687494	-0.687494
Bombycilla|Phodilus_b	0.255	0.685839	-0.685839
Apteryx_ha|Cacatua_mo	0.25	0.684876	-0.684876
Casuarius_|Pycnonotus	0.236	0.683803	-0.683803
Anhinga_ru|Pelecanus_	0.175	0.683394	-0.683394
Casuarius_|Fringilla_	0.242	0.682657	-0.682657
Pterogloss|Aceros_cor	0.221	0.681825	-0.681825
Tachybaptu|Larus_domi	0.164	0.681042	-0.681042
Eudynamys_|Passer_mon	0.234	0.679414	-0.679414
Eudynamys_|Morus_serr	0.189	0.678508	-0.678508
Eudynamys_|Garrulus_g	0.234	0.678208	-0.678208
Gallus_gal|Synthlibor	0.209	0.676406	-0.676406
Coturnix_j|Synthlibor	0.216	0.676406	-0.676406
Fulica_atr|Bycanistes	0.201	0.675782	-0.675782
Colinus_vi|Passer_mon	0.246	0.674231	-0.674231
Colinus_vi|Morus_serr	0.219	0.673325	-0.673325
Sylvia_atr|Aceros_wal	0.243	0.673306	-0.673306
Megalurus_|Phodilus_b	0.241	0.673276	-0.673276
Henicorhin|Tregellasi	0.181	0.673064	-0.673064
Colinus_vi|Garrulus_g	0.252	0.673026	-0.673026
Pterogloss|Amazona_ba	0.237	0.672664	-0.672664
Cecropis_d|Cacatua_mo	0.25	0.67208	-0.67208
Pseudopodo|Aceros_wal	0.227	0.671562	-0.671562
Anhinga_ru|Larus_domi	0.181	0.67126	-0.67126
Mionectes_|Aegotheles	0.233	0.670611	-0.670611
Ciconia_ci|Aceros_wal	0.178	0.66966	-0.66966
Fulica_atr|Pelecanus_	0.193	0.669281	-0.669281
Fulica_atr|Agapornis_	0.236	0.668903	-0.668903
Tachybaptu|Pandion_ha	0.177	0.66871	-0.66871
Eudynamys_|Pseudopodo	0.225	0.668675	-0.668675
Tachybaptu|Apus_apus_	0.165	0.668528	-0.668528
Eudynamys_|Botaurus_s	0.19	0.667915	-0.667915
Casuarius_|Pterogloss	0.249	0.667324	-0.667324
Eudynamys_|Sylvia_atr	0.237	0.666932	-0.666932
Taeniopygi|Melopsitta	0.228	0.666884	-0.666884
Eudynamys_|Vanellus_v	0.186	0.666567	-0.666567
Eudynamys_|Grus_grus_	0.178	0.66652	-0.66652
Fringilla_|Aceros_cor	0.223	0.666491	-0.666491
Oriolus_ch|Caprimulgu	0.252	0.665654	-0.665654
Pycnonotus|Aceros_cor	0.226	0.665345	-0.665345
Phylloscop|Caprimulgu	0.246	0.6648	-0.6648
Tachybaptu|Petroica_b	0.215	0.664194	-0.664194
Colinus_vi|Pseudopodo	0.239	0.663493	-0.663493
Turdus_hor|Melopsitta	0.238	0.662875	-0.662875
Colinus_vi|Botaurus_s	0.22	0.662733	-0.662733
Garrulus_g|Aceros_wal	0.234	0.662029	-0.662029
Colinus_vi|Sylvia_atr	0.253	0.661749	-0.661749
Colinus_vi|Vanellus_v	0.21	0.661385	-0.661385
Colinus_vi|Grus_grus_	0.21	0.661338	-0.661338
Luscinia_c|Cacatua_mo	0.238	0.661209	-0.661209
Passer_mon|Aceros_wal	0.23	0.660823	-0.660823
Henicorhin|Aegotheles	0.24	0.659853	-0.659853
Gallus_gal|Vireo_oliv	0.242	0.65837	-0.65837
Coturnix_j|Vireo_oliv	0.241	0.65837	-0.65837
Fringilla_|Amazona_ba	0.237	0.65733	-0.65733
Fulica_atr|Larus_domi	0.197	0.657148	-0.657148
Acrocephal|Aceros_cor	0.234	0.65698	-0.65698
Pycnonotus|Amazona_ba	0.243	0.656184	-0.656184
Anser_albi|Tregellasi	0.236	0.654837	-0.654837
Casuarius_|Synthlibor	0.209	0.654305	-0.654305
Aegithalos|Caprimulgu	0.251	0.653439	-0.653439
Jacana_jac|Balaenicep	0.224	0.652432	-0.652432
Apteryx_ha|Aceros_cor	0.23	0.651936	-0.651936
Todiramphu|Balaenicep	0.232	0.651152	-0.651152
Eudynamys_|Bubo_bubo_	0.228	0.650921	-0.650921
Acanthisit|Bycanistes	0.216	0.649551	-0.649551
Vireo_oliv|Melopsitta	0.231	0.648448	-0.648448
Acrocephal|Amazona_ba	0.249	0.647819	-0.647819
Falco_pere|Aegotheles	0.216	0.647474	-0.647474
Agelaius_p|Phodilus_b	0.237	0.647163	-0.647163
Thraupis_e|Bycanistes	0.22	0.64682	-0.64682
Colinus_vi|Bubo_bubo_	0.243	0.645739	-0.645739
Tachybaptu|Pterodroma	0.157	0.644988	-0.644988
Fulica_atr|Pandion_ha	0.212	0.644816	-0.644816
Gallus_gal|Turdus_hor	0.244	0.643944	-0.643944
Coturnix_j|Turdus_hor	0.25	0.643944	-0.643944
Acanthisit|Pelecanus_	0.204	0.64305	-0.64305
Apteryx_ha|Amazona_ba	0.245	0.642775	-0.642775
Acanthisit|Agapornis_	0.246	0.642672	-0.642672
Gavia_stel|Tregellasi	0.217	0.642276	-0.642276
Jacana_jac|Haematopus	0.168	0.642053	-0.642053
Anser_albi|Aegotheles	0.225	0.641625	-0.641625
Himatione_|Caprimulgu	0.247	0.640885	-0.640885
Todiramphu|Haematopus	0.188	0.640773	-0.640773
Thraupis_e|Pelecanus_	0.219	0.640319	-0.640319
Fulica_atr|Petroica_b	0.236	0.6403	-0.6403
Archilochu|Caprimulgu	0.231	0.640153	-0.640153
Thraupis_e|Agapornis_	0.248	0.639941	-0.639941
Gallus_gal|Taeniopygi	0.236	0.639935	-0.639935
Coturnix_j|Taeniopygi	0.237	0.639935	-0.639935
Cecropis_d|Aceros_cor	0.236	0.63914	-0.63914
Oriolus_ch|Aceros_wal	0.237	0.638984	-0.638984
Eurystomus|Balaenicep	0.238	0.638401	-0.638401
Phylloscop|Aceros_wal	0.233	0.638129	-0.638129
Cardinalis|Tregellasi	0.18	0.63738	-0.63738
Casuarius_|Vireo_oliv	0.24	0.636269	-0.636269
Acanthisit|Larus_domi	0.215	0.630917	-0.630917
Eudynamys_|Luscinia_c	0.221	0.630523	-0.630523
Cecropis_d|Amazona_ba	0.244	0.629979	-0.629979
Jacana_jac|Nipponia_n	0.178	0.62938	-0.62938
Gavia_stel|Aegotheles	0.177	0.629065	-0.629065
Anseranas_|Caprimulgu	0.222	0.628686	-0.628686
Luscinia_c|Aceros_cor	0.222	0.628269	-0.628269
Thraupis_e|Larus_domi	0.217	0.628186	-0.628186
Todiramphu|Nipponia_n	0.186	0.6281	-0.6281
Eurystomus|Haematopus	0.191	0.628022	-0.628022
Tachybaptu|Phaethon_r	0.173	0.627108	-0.627108
Sagittariu|Pelecanus_	0.185	0.626882	-0.626882
Aegithalos|Aceros_wal	0.238	0.626768	-0.626768
Tachybaptu|Sturnus_se	0.212	0.62559	-0.62559
Colinus_vi|Luscinia_c	0.237	0.625341	-0.625341
Sylvia_atr|Cacatua_mo	0.26	0.624801	-0.624801
Cardinalis|Aegotheles	0.241	0.624169	-0.624169
Gallus_gal|Buteo_bute	0.215	0.623483	-0.623483
Coturnix_j|Buteo_bute	0.224	0.623483	-0.623483
Pseudopodo|Cacatua_mo	0.244	0.623057	-0.623057
Ceryle_rud|Dupetor_fl	0.194	0.622629	-0.622629
Casuarius_|Turdus_hor	0.245	0.621843	-0.621843
Alectura_l|Brotogeris	0.242	0.621395	-0.621395
Bombycilla|Tregellasi	0.182	0.621362	-0.621362
Ciconia_ci|Cacatua_mo	0.201	0.621155	-0.621155
Eudynamys_|Cecropis_d	0.233	0.619653	-0.619653
Luscinia_c|Amazona_ba	0.233	0.619109	-0.619109
Acanthisit|Pandion_ha	0.229	0.618585	-0.618585
Taeniopygi|Phodilus_b	0.231	0.618113	-0.618113
Casuarius_|Taeniopygi	0.233	0.617834	-0.617834
Pterogloss|Melopsitta	0.234	0.617394	-0.617394
Eudynamys_|Arenaria_i	0.186	0.61628	-0.61628
Thraupis_e|Pandion_ha	0.231	0.615854	-0.615854
Eurystomus|Nipponia_n	0.192	0.615349	-0.615349
Sagittariu|Larus_domi	0.18	0.614748	-0.614748
Colinus_vi|Cecropis_d	0.241	0.61447	-0.61447
Himatione_|Aceros_wal	0.231	0.614214	-0.614214
Turdus_hor|Phodilus_b	0.251	0.614104	-0.614104
Garrulus_g|Cacatua_mo	0.253	0.613524	-0.613524
Archilochu|Aceros_wal	0.219	0.613482	-0.613482
Passer_mon|Cacatua_mo	0.256	0.612319	-0.612319
Thraupis_e|Petroica_b	0.168	0.611338	-0.611338
Colinus_vi|Arenaria_i	0.213	0.611098	-0.611098
Gallus_gal|Agelaius_p	0.239	0.610885	-0.610885
Coturnix_j|Agelaius_p	0.241	0.610885	-0.610885
Regulus_ca|Brotogeris	0.253	0.610844	-0.610844
Todiramphu|Morus_serr	0.194	0.610356	-0.610356
Megalurus_|Tregellasi	0.175	0.6088	-0.6088
Bombycilla|Aegotheles	0.241	0.608151	-0.608151
Gallus_gal|Otis_tarda	0.211	0.603502	-0.603502
Coturnix_j|Otis_tarda	0.213	0.603502	-0.603502
Fulica_atr|Phaethon_r	0.205	0.603213	-0.603213
Fringilla_|Melopsitta	0.234	0.60206	-0.60206
Anseranas_|Aceros_wal	0.21	0.602016	-0.602016
Eudynamys_|Acrocephal	0.233	0.601813	-0.601813
Fulica_atr|Sturnus_se	0.23	0.601696	-0.601696
Colinus_vi|Apteryx_ha	0.234	0.601674	-0.601674
Dryocopus_|Brotogeris	0.244	0.601435	-0.601435
Casuarius_|Buteo_bute	0.214	0.601382	-0.601382
Crax_rubra|Brotogeris	0.231	0.601229	-0.601229
Jacana_jac|Botaurus_s	0.186	0.601043	-0.601043
Pycnonotus|Melopsitta	0.236	0.600914	-0.600914
Todiramphu|Botaurus_s	0.199	0.599763	-0.599763
Jacana_jac|Vanellus_v	0.171	0.599695	-0.599695
Vireo_oliv|Phodilus_b	0.234	0.599678	-0.599678
Jacana_jac|Grus_grus_	0.174	0.599648	-0.599648
Eudynamys_|Columba_li	0.195	0.599079	-0.599079
Todiramphu|Vanellus_v	0.187	0.598415	-0.598415
Todiramphu|Grus_grus_	0.188	0.598368	-0.598368
Eurystomus|Morus_serr	0.204	0.597605	-0.597605
Colinus_vi|Acrocephal	0.25	0.59663	-0.59663
Megalurus_|Aegotheles	0.232	0.595588	-0.595588
Colinus_vi|Columba_li	0.22	0.593897	-0.593897
Eudynamys_|Pycnonotus	0.228	0.593447	-0.593447
Acrocephal|Melopsitta	0.243	0.592548	-0.592548
Eudynamys_|Fringilla_	0.226	0.592301	-0.592301
Sylvia_atr|Aceros_cor	0.247	0.591861	-0.591861
Oriolus_ch|Cacatua_mo	0.259	0.590479	-0.590479
Pseudopodo|Aceros_cor	0.229	0.590117	-0.590117
Phylloscop|Cacatua_mo	0.254	0.589624	-0.589624
Casuarius_|Agelaius_p	0.241	0.588784	-0.588784
Colinus_vi|Pycnonotus	0.245	0.588265	-0.588265
Ciconia_ci|Aceros_cor	0.179	0.588215	-0.588215
Apteryx_ha|Melopsitta	0.233	0.587504	-0.587504
Colinus_vi|Fringilla_	0.237	0.587119	-0.587119
Eurystomus|Botaurus_s	0.198	0.587012	-0.587012
Eurystomus|Vanellus_v	0.193	0.585664	-0.585664
Eurystomus|Grus_grus_	0.193	0.585617	-0.585617
Gallus_gal|Megalurus_	0.235	0.584771	-0.584771
Coturnix_j|Megalurus_	0.24	0.584771	-0.584771
Todiramphu|Bubo_bubo_	0.221	0.582769	-0.582769
Sylvia_atr|Amazona_ba	0.25	0.5827	-0.5827
Agelaius_p|Tregellasi	0.165	0.582686	-0.582686
Casuarius_|Otis_tarda	0.205	0.581401	-0.581401
Pseudopodo|Amazona_ba	0.237	0.580957	-0.580957
Garrulus_g|Aceros_cor	0.233	0.580584	-0.580584
Passer_mon|Aceros_cor	0.231	0.579379	-0.579379
Ciconia_ci|Amazona_ba	0.197	0.579054	-0.579054
Aegithalos|Cacatua_mo	0.256	0.578263	-0.578263
Acanthisit|Phaethon_r	0.218	0.576982	-0.576982
Eudynamys_|Pterogloss	0.235	0.576967	-0.576967
Sturnus_se|Caprimulgu	0.244	0.576223	-0.576223
Eudyptes_c|Thalassarc	0.151	0.576001	-0.576001
Cecropis_d|Melopsitta	0.242	0.574709	-0.574709
Thraupis_e|Phaethon_r	0.227	0.574251	-0.574251
Tachybaptu|Anseranas_	0.179	0.573127	-0.573127
Thraupis_e|Sturnus_se	0.163	0.572734	-0.572734
Gallus_gal|Bombycilla	0.247	0.572209	-0.572209
Coturnix_j|Bombycilla	0.25	0.572209	-0.572209
Alauda_arv|Brotogeris	0.242	0.572148	-0.572148
Colinus_vi|Pterogloss	0.243	0.571785	-0.571785
Garrulus_g|Amazona_ba	0.245	0.571423	-0.571423
Passer_mon|Amazona_ba	0.242	0.570218	-0.570218
Alectura_l|Bycanistes	0.22	0.570162	-0.570162
Eurystomus|Bubo_bubo_	0.228	0.570018	-0.570018
Agelaius_p|Aegotheles	0.234	0.569475	-0.569475
Pterogloss|Phodilus_b	0.238	0.568623	-0.568623
Himatione_|Cacatua_mo	0.26	0.56571	-0.56571
Archilochu|Cacatua_mo	0.235	0.564977	-0.564977
Remiz_cons|Brotogeris	0.234	0.564276	-0.564276
Eudynamys_|Synthlibor	0.182	0.563949	-0.563949
Eudyptes_c|Brotogeris	0.198	0.563924	-0.563924
Luscinia_c|Melopsitta	0.228	0.563838	-0.563838
Alectura_l|Pelecanus_	0.214	0.563661	-0.563661
Alectura_l|Agapornis_	0.247	0.563283	-0.563283
Casuarius_|Megalurus_	0.243	0.56267	-0.56267
Tachybaptu|Archilochu	0.195	0.561661	-0.561661
Tachybaptu|Himatione_	0.216	0.560929	-0.560929
Regulus_ca|Bycanistes	0.237	0.55961	-0.55961
Lanius_tep|Brotogeris	0.254	0.558872	-0.558872
Colinus_vi|Synthlibor	0.213	0.558766	-0.558766
Oriolus_ch|Aceros_cor	0.242	0.557539	-0.557539
Buteo_bute|Aegotheles	0.193	0.556877	-0.556877
Pterodroma|Caprimulgu	0.211	0.556826	-0.556826
Phylloscop|Aceros_cor	0.234	0.556684	-0.556684
Gallus_gal|Cardinalis	0.245	0.556191	-0.556191
Coturnix_j|Cardinalis	0.252	0.556191	-0.556191
Phalacroco|Pelecanus_	0.174	0.555899	-0.555899
Tachybaptu|Balaenicep	0.198	0.55421	-0.55421
Taeniopygi|Tregellasi	0.165	0.553636	-0.553636
Anseranas_|Cacatua_mo	0.231	0.553511	-0.553511
Fringilla_|Phodilus_b	0.235	0.553289	-0.553289
Regulus_ca|Pelecanus_	0.232	0.553109	-0.553109
Regulus_ca|Agapornis_	0.261	0.552731	-0.552731
Pycnonotus|Phodilus_b	0.24	0.552143	-0.552143
Sitta_caro|Brotogeris	0.239	0.551726	-0.551726
Alectura_l|Larus_domi	0.212	0.551528	-0.551528
Dryocopus_|Bycanistes	0.214	0.550201	-0.550201
Casuarius_|Bombycilla	0.243	0.550107	-0.550107
Crax_rubra|Bycanistes	0.211	0.549996	-0.549996
Turdus_hor|Tregellasi	0.172	0.549627	-0.549627
Sturnus_se|Aceros_wal	0.225	0.549553	-0.549553
Oriolus_ch|Amazona_ba	0.251	0.548378	-0.548378
Tachybaptu|Aegithalos	0.22	0.548375	-0.548375
Todiramphu|Arenaria_i	0.19	0.548128	-0.548128
Phylloscop|Amazona_ba	0.238	0.547523	-0.547523
Eudynamys_|Vireo_oliv	0.222	0.545913	-0.545913
Aegithalos|Aceros_cor	0.241	0.545324	-0.545324
Anhinga_ru|Balaenicep	0.219	0.544428	-0.544428
Tachybaptu|Haematopus	0.154	0.543831	-0.543831
Acrocephal|Phodilus_b	0.245	0.543778	-0.543778
Phalacroco|Larus_domi	0.174	0.543766	-0.543766
Dryocopus_|Pelecanus_	0.218	0.543701	-0.543701
Crax_rubra|Pelecanus_	0.209	0.543495	-0.543495
Dryocopus_|Agapornis_	0.245	0.543322	-0.543322
Crax_rubra|Agapornis_	0.244	0.543117	-0.543117
Regulus_ca|Larus_domi	0.226	0.540976	-0.540976
Colinus_vi|Vireo_oliv	0.245	0.54073	-0.54073
Taeniopygi|Aegotheles	0.225	0.540425	-0.540425
Alectura_l|Pandion_ha	0.226	0.539196	-0.539196
Alectura_l|Apus_apus_	0.214	0.539013	-0.539013
Gallus_gal|Anser_albi	0.209	0.538734	-0.538734
Coturnix_j|Anser_albi	0.211	0.538734	-0.538734
Apteryx_ha|Phodilus_b	0.24	0.538734	-0.538734
Petroica_b|Caprimulgu	0.245	0.537619	-0.537619
Fulica_atr|Himatione_	0.235	0.537034	-0.537034
Tachybaptu|Phylloscop	0.212	0.537014	-0.537014
Turdus_hor|Aegotheles	0.242	0.536416	-0.536416
Aegithalos|Amazona_ba	0.245	0.536163	-0.536163
Tachybaptu|Oriolus_ch	0.221	0.536159	-0.536159
Eurystomus|Arenaria_i	0.192	0.535377	-0.535377
Vireo_oliv|Tregellasi	0.17	0.535201	-0.535201
Alectura_l|Petroica_b	0.239	0.53468	-0.53468
Casuarius_|Cardinalis	0.243	0.53409	-0.53409
Anhinga_ru|Haematopus	0.174	0.534049	-0.534049
Apus_apus_|Caprimulgu	0.212	0.533286	-0.533286
Gallus_gal|Falco_pere	0.227	0.532885	-0.532885
Coturnix_j|Falco_pere	0.238	0.532885	-0.532885
Himatione_|Aceros_cor	0.233	0.53277	-0.53277
Dupetor_fl|Otis_tarda	0.172	0.532477	-0.532477
Archilochu|Aceros_cor	0.221	0.532038	-0.532038
Dryocopus_|Larus_domi	0.215	0.531567	-0.531567
Eudynamys_|Turdus_hor	0.233	0.531486	-0.531486
Crax_rubra|Larus_domi	0.204	0.531362	-0.531362
Tachybaptu|Nipponia_n	0.156	0.531158	-0.531158
Todiramphu|Columba_li	0.201	0.530927	-0.530927
Fulica_atr|Balaenicep	0.236	0.530316	-0.530316
Pterodroma|Aceros_wal	0.194	0.530156	-0.530156
Regulus_ca|Pandion_ha	0.239	0.528644	-0.528644
Eudynamys_|Taeniopygi	0.224	0.527478	-0.527478
Sylvia_atr|Melopsitta	0.246	0.52743	-0.52743
Colinus_vi|Turdus_hor	0.248	0.526304	-0.526304
Cecropis_d|Phodilus_b	0.238	0.525938	-0.525938
Pseudopodo|Melopsitta	0.232	0.525686	-0.525686
Fulica_atr|Aegithalos	0.238	0.524481	-0.524481
Regulus_ca|Petroica_b	0.181	0.524128	-0.524128
Ciconia_ci|Melopsitta	0.188	0.523784	-0.523784
Himatione_|Amazona_ba	0.245	0.523609	-0.523609
Archilochu|Amazona_ba	0.227	0.522877	-0.522877
Colinus_vi|Taeniopygi	0.241	0.522295	-0.522295
Vireo_oliv|Aegotheles	0.231	0.521989	-0.521989
Anhinga_ru|Nipponia_n	0.173	0.521376	-0.521376
Alauda_arv|Bycanistes	0.23	0.520914	-0.520914
Anseranas_|Aceros_cor	0.21	0.520571	-0.520571
Gallus_gal|Henicorhin	0.246	0.520507	-0.520507
Coturnix_j|Henicorhin	0.251	0.520507	-0.520507
Fulica_atr|Haematopus	0.188	0.519937	-0.519937
Dryocopus_|Pandion_ha	0.235	0.519235	-0.519235
Crax_rubra|Pandion_ha	0.227	0.51903	-0.51903
Crax_rubra|Apus_apus_	0.211	0.518847	-0.518847
Mionectes_|Brotogeris	0.244	0.518713	-0.518713
Eurystomus|Columba_li	0.207	0.518176	-0.518176
Garrulus_g|Melopsitta	0.243	0.516153	-0.516153
Luscinia_c|Phodilus_b	0.231	0.515067	-0.515067
Passer_mon|Melopsitta	0.24	0.514947	-0.514947
Crax_rubra|Petroica_b	0.239	0.514514	-0.514514
Alauda_arv|Pelecanus_	0.219	0.514413	-0.514413
Tachybaptu|Passer_mon	0.218	0.51432	-0.51432
Alauda_arv|Agapornis_	0.248	0.514035	-0.514035
Cathartes_|Caprimulgu	0.205	0.513926	-0.513926
Tachybaptu|Morus_serr	0.168	0.513414	-0.513414
Fulica_atr|Phylloscop	0.229	0.51312	-0.51312
Tachybaptu|Garrulus_g	0.218	0.513114	-0.513114
Remiz_cons|Bycanistes	0.218	0.513043	-0.513043
Eudyptes_c|Bycanistes	0.173	0.51269	-0.51269
Fulica_atr|Oriolus_ch	0.238	0.512265	-0.512265
Anseranas_|Amazona_ba	0.223	0.51141	-0.51141
Eudynamys_|Buteo_bute	0.192	0.511025	-0.511025
Petroica_b|Aceros_wal	0.228	0.510949	-0.510949
Casuarius_|Falco_pere	0.23	0.510784	-0.510784
Gallus_gal|Mionectes_	0.238	0.509749	-0.509749
Coturnix_j|Mionectes_	0.243	0.509749	-0.509749
Agapornis_|Caprimulgu	0.234	0.509016	-0.509016
Thraupis_e|Himatione_	0.126	0.508073	-0.508073
Henicorhin|Brotogeris	0.248	0.507954	-0.507954
Lanius_tep|Bycanistes	0.242	0.507638	-0.507638
Fulica_atr|Nipponia_n	0.188	0.507264	-0.507264
Apus_apus_|Aceros_wal	0.198	0.506615	-0.506615
Remiz_cons|Pelecanus_	0.216	0.506542	-0.506542
Eudyptes_c|Pelecanus_	0.157	0.506189	-0.506189
Remiz_cons|Agapornis_	0.24	0.506164	-0.506164
Colinus_vi|Buteo_bute	0.223	0.505843	-0.505843
Eudyptes_c|Agapornis_	0.208	0.505811	-0.505811
Acanthisit|Balaenicep	0.254	0.504085	-0.504085
Synthlibor|Aegotheles	0.183	0.503954	-0.503954
Anhinga_ru|Morus_serr	0.166	0.503632	-0.503632
Tachybaptu|Pseudopodo	0.214	0.503581	-0.503581
Tachybaptu|Botaurus_s	0.171	0.502821	-0.502821
Alauda_arv|Larus_domi	0.221	0.50228	-0.50228
Bycanistes|Caprimulgu	0.213	0.502137	-0.502137
Tachybaptu|Sylvia_atr	0.22	0.501837	-0.501837
Tachybaptu|Vanellus_v	0.159	0.501473	-0.501473
Tachybaptu|Grus_grus_	0.156	0.501426	-0.501426
Thraupis_e|Balaenicep	0.256	0.501354	-0.501354
Lanius_tep|Pelecanus_	0.232	0.501137	-0.501137
Sturnus_se|Cacatua_mo	0.247	0.501048	-0.501048
Eudyptes_c|Cathartes_	0.154	0.500901	-0.500901
Lanius_tep|Agapornis_	0.269	0.500759	-0.500759
Sitta_caro|Bycanistes	0.225	0.500493	-0.500493
Eudynamys_|Agelaius_p	0.227	0.498428	-0.498428
Casuarius_|Henicorhin	0.25	0.498406	-0.498406
Alectura_l|Phaethon_r	0.221	0.497593	-0.497593
Jacana_jac|Synthlibor	0.168	0.497077	-0.497077
Alectura_l|Sturnus_se	0.24	0.496076	-0.496076
Todiramphu|Synthlibor	0.191	0.495796	-0.495796
Thraupis_e|Aegithalos	0.166	0.495519	-0.495519
Bubo_bubo_|Phodilus_b	0.219	0.494669	-0.494669
Remiz_cons|Larus_domi	0.221	0.494409	-0.494409
Eudyptes_c|Larus_domi	0.166	0.494056	-0.494056
Sitta_caro|Pelecanus_	0.219	0.493992	-0.493992
Acanthisit|Haematopus	0.208	0.493706	-0.493706
Sitta_caro|Agapornis_	0.249	0.493614	-0.493614
Colinus_vi|Agelaius_p	0.239	0.493245	-0.493245
Oriolus_ch|Melopsitta	0.247	0.493108	-0.493108
Anhinga_ru|Botaurus_s	0.184	0.493039	-0.493039
Phylloscop|Melopsitta	0.236	0.492253	-0.492253
Anhinga_ru|Vanellus_v	0.182	0.491691	-0.491691
Anhinga_ru|Grus_grus_	0.169	0.491644	-0.491644
Eudynamys_|Otis_tarda	0.189	0.491045	-0.491045
Thraupis_e|Haematopus	0.214	0.490975	-0.490975
Pterogloss|Aegotheles	0.232	0.490935	-0.490935
Fulica_atr|Passer_mon	0.236	0.490426	-0.490426
Alauda_arv|Pandion_ha	0.235	0.489948	-0.489948
Anser_albi|Brotogeris	0.239	0.489727	-0.489727
Fulica_atr|Morus_serr	0.196	0.489519	-0.489519
Gavia_stel|Thalassarc	0.148	0.489244	-0.489244
Fulica_atr|Garrulus_g	0.24	0.48922	-0.48922
Lanius_tep|Larus_domi	0.232	0.489004	-0.489004
Fringilla_|Tregellasi	0.167	0.488812	-0.488812
Sagittariu|Balaenicep	0.22	0.487916	-0.487916
Pycnonotus|Tregellasi	0.174	0.487666	-0.487666
Casuarius_|Mionectes_	0.243	0.487648	-0.487648
Cathartes_|Aceros_wal	0.188	0.487256	-0.487256
Regulus_ca|Phaethon_r	0.241	0.487041	-0.487041
Colinus_vi|Otis_tarda	0.214	0.485862	-0.485862
Tachybaptu|Bubo_bubo_	0.197	0.485827	-0.485827
Alauda_arv|Petroica_b	0.175	0.485432	-0.485432
Thraupis_e|Phylloscop	0.16	0.484158	-0.484158
Thraupis_e|Oriolus_ch	0.18	0.483303	-0.483303
Eurystomus|Synthlibor	0.195	0.483046	-0.483046
Remiz_cons|Pandion_ha	0.235	0.482076	-0.482076
Sitta_caro|Larus_domi	0.22	0.481859	-0.481859
Eudyptes_c|Pandion_ha	0.177	0.481724	-0.481724
Pterodroma|Cacatua_mo	0.208	0.481651	-0.481651
Eudyptes_c|Apus_apus_	0.169	0.481542	-0.481542
Acanthisit|Nipponia_n	0.206	0.481033	-0.481033
Aegithalos|Melopsitta	0.244	0.480892	-0.480892
Fulica_atr|Pseudopodo	0.229	0.479687	-0.479687
Acrocephal|Tregellasi	0.178	0.479301	-0.479301
Fulica_atr|Botaurus_s	0.202	0.478927	-0.478927
Sylvia_atr|Phodilus_b	0.254	0.478659	-0.478659
Thraupis_e|Nipponia_n	0.216	0.478302	-0.478302
Fulica_atr|Sylvia_atr	0.236	0.477943	-0.477943
Dryocopus_|Phaethon_r	0.221	0.477633	-0.477633
Fulica_atr|Vanellus_v	0.187	0.477579	-0.477579
Remiz_cons|Petroica_b	0.167	0.477561	-0.477561
Sagittariu|Haematopus	0.169	0.477537	-0.477537
Fulica_atr|Grus_grus_	0.177	0.477532	-0.477532
Crax_rubra|Phaethon_r	0.215	0.477427	-0.477427
Eudyptes_c|Petroica_b	0.217	0.477208	-0.477208
Gavia_stel|Brotogeris	0.197	0.477166	-0.477166
Pseudopodo|Phodilus_b	0.24	0.476915	-0.476915
Gallus_gal|Sitta_caro	0.24	0.476735	-0.476735
Coturnix_j|Sitta_caro	0.243	0.476735	-0.476735
Lanius_tep|Pandion_ha	0.245	0.476672	-0.476672
Crax_rubra|Sturnus_se	0.234	0.47591	-0.47591
Fringilla_|Aegotheles	0.231	0.475601	-0.475601
Ciconia_ci|Phodilus_b	0.198	0.475013	-0.475013
Pycnonotus|Aegotheles	0.229	0.474455	-0.474455
Apteryx_ha|Tregellasi	0.249	0.474257	-0.474257
Eudynamys_|Megalurus_	0.23	0.472314	-0.472314
Cardinalis|Brotogeris	0.248	0.47227	-0.47227
Lanius_tep|Petroica_b	0.19	0.472156	-0.472156
Gallus_gal|Lanius_tep	0.253	0.46959	-0.46959
Coturnix_j|Lanius_tep	0.257	0.46959	-0.46959
Sitta_caro|Pandion_ha	0.23	0.469527	-0.469527
Columba_li|Aegotheles	0.198	0.468823	-0.468823
Himatione_|Melopsitta	0.241	0.468338	-0.468338
Sturnus_se|Aceros_cor	0.227	0.468108	-0.468108
Archilochu|Melopsitta	0.221	0.467606	-0.467606
Mionectes_|Bycanistes	0.224	0.467479	-0.467479
Garrulus_g|Phodilus_b	0.243	0.467382	-0.467382
Colinus_vi|Megalurus_	0.238	0.467132	-0.467132
Passer_mon|Phodilus_b	0.24	0.466177	-0.466177
Acrocephal|Aegotheles	0.243	0.46609	-0.46609
Tachybaptu|Luscinia_c	0.204	0.465429	-0.465429
Sitta_caro|Petroica_b	0.174	0.465011	-0.465011
Sagittariu|Nipponia_n	0.173	0.464864	-0.464864
Gallus_gal|Remiz_cons	0.236	0.464185	-0.464185
Coturnix_j|Remiz_cons	0.246	0.464185	-0.464185
Acanthisit|Morus_serr	0.214	0.463289	-0.463289
Petroica_b|Cacatua_mo	0.252	0.462444	-0.462444
Fulica_atr|Bubo_bubo_	0.229	0.461933	-0.461933
Thraupis_e|Passer_mon	0.134	0.461464	-0.461464
Cecropis_d|Tregellasi	0.182	0.461461	-0.461461
Apteryx_ha|Aegotheles	0.224	0.461046	-0.461046
Mionectes_|Pelecanus_	0.222	0.460978	-0.460978
Mionectes_|Agapornis_	0.252	0.4606	-0.4606
Thraupis_e|Morus_serr	0.225	0.460558	-0.460558
Thraupis_e|Garrulus_g	0.176	0.460258	-0.460258
Eudynamys_|Bombycilla	0.236	0.459751	-0.459751
Sturnus_se|Amazona_ba	0.236	0.458947	-0.458947
Apus_apus_|Cacatua_mo	0.216	0.45811	-0.45811
Eudyptes_c|Pterodroma	0.158	0.458001	-0.458001
Henicorhin|Bycanistes	0.226	0.456721	-0.456721
Gallus_gal|Alauda_arv	0.239	0.456314	-0.456314
Coturnix_j|Alauda_arv	0.249	0.456314	-0.456314
Bombycilla|Brotogeris	0.254	0.456253	-0.456253
Anseranas_|Melopsitta	0.216	0.45614	-0.45614
Casuarius_|Sitta_caro	0.245	0.454634	-0.454634
Colinus_vi|Bombycilla	0.25	0.454569	-0.454569
Tachybaptu|Cecropis_d	0.216	0.454558	-0.454558
Acanthisit|Botaurus_s	0.214	0.452696	-0.452696
Arenaria_i|Aegotheles	0.187	0.451622	-0.451622
Acanthisit|Vanellus_v	0.207	0.451348	-0.451348
Acanthisit|Grus_grus_	0.205	0.451301	-0.451301
Tachybaptu|Arenaria_i	0.164	0.451186	-0.451186
Brotogeris|Caprimulgu	0.231	0.450904	-0.450904
Thraupis_e|Pseudopodo	0.151	0.450725	-0.450725
Luscinia_c|Tregellasi	0.161	0.450591	-0.450591
Henicorhin|Pelecanus_	0.223	0.45022	-0.45022
Thraupis_e|Botaurus_s	0.223	0.449965	-0.449965
Henicorhin|Agapornis_	0.256	0.449842	-0.449842
Thraupis_e|Sylvia_atr	0.175	0.448981	-0.448981
Mionectes_|Larus_domi	0.216	0.448845	-0.448845
Pterodroma|Aceros_cor	0.195	0.448711	-0.448711
Thraupis_e|Vanellus_v	0.217	0.448617	-0.448617
Thraupis_e|Grus_grus_	0.215	0.44857	-0.44857
Alauda_arv|Phaethon_r	0.228	0.448345	-0.448345
Cecropis_d|Aegotheles	0.235	0.44825	-0.44825
Casuarius_|Lanius_tep	0.251	0.447488	-0.447488
Sagittariu|Morus_serr	0.182	0.44712	-0.44712
Oriolus_ch|Phodilus_b	0.248	0.444337	-0.444337
Eudynamys_|Cardinalis	0.232	0.443734	-0.443734
Megalurus_|Brotogeris	0.238	0.44369	-0.44369
Alectura_l|Anseranas_	0.187	0.443613	-0.443613
Phylloscop|Phodilus_b	0.244	0.443482	-0.443482
Todiramphu|Buteo_bute	0.198	0.442873	-0.442873
Casuarius_|Remiz_cons	0.249	0.442084	-0.442084
Tachybaptu|Apteryx_ha	0.203	0.441763	-0.441763
Fulica_atr|Luscinia_c	0.223	0.441535	-0.441535
Anhinga_ru|Arenaria_i	0.183	0.441404	-0.441404
Remiz_cons|Phaethon_r	0.22	0.440474	-0.440474
Eudyptes_c|Phaethon_r	0.167	0.440121	-0.440121
Pterodroma|Amazona_ba	0.206	0.43955	-0.43955
Thalassarc|Caprimulgu	0.206	0.438826	-0.438826
Cathartes_|Cacatua_mo	0.209	0.438751	-0.438751
Eudyptes_c|Sturnus_se	0.211	0.438604	-0.438604
Colinus_vi|Cardinalis	0.248	0.438551	-0.438551
Anser_albi|Bycanistes	0.216	0.438493	-0.438493
Henicorhin|Larus_domi	0.227	0.438087	-0.438087
Falco_pere|Pelecanus_	0.202	0.437842	-0.437842
Luscinia_c|Aegotheles	0.226	0.437379	-0.437379
Tachybaptu|Acrocephal	0.222	0.436719	-0.436719
Sagittariu|Botaurus_s	0.185	0.436527	-0.436527
Mionectes_|Pandion_ha	0.232	0.436513	-0.436513
Acanthisit|Bubo_bubo_	0.238	0.435702	-0.435702
Sagittariu|Vanellus_v	0.177	0.435179	-0.435179
Sagittariu|Grus_grus_	0.167	0.435132	-0.435132
Lanius_tep|Phaethon_r	0.247	0.435069	-0.435069
Casuarius_|Alauda_arv	0.243	0.434213	-0.434213
Tachybaptu|Columba_li	0.172	0.433985	-0.433985
Agapornis_|Cacatua_mo	0.186	0.433841	-0.433841
Thraupis_e|Bubo_bubo_	0.245	0.432971	-0.432971
Alectura_l|Archilochu	0.239	0.432146	-0.432146
Aegithalos|Phodilus_b	0.248	0.432121	-0.432121
Anser_albi|Pelecanus_	0.21	0.431993	-0.431993
Anser_albi|Agapornis_	0.242	0.431615	-0.431615
Alectura_l|Himatione_	0.247	0.431414	-0.431414
Fulica_atr|Cecropis_d	0.232	0.430664	-0.430664
Eurystomus|Buteo_bute	0.199	0.430122	-0.430122
Petroica_b|Aceros_cor	0.23	0.429504	-0.429504
Tachybaptu|Pycnonotus	0.21	0.428353	-0.428353
Sitta_caro|Phaethon_r	0.232	0.427924	-0.427924
Fulica_atr|Arenaria_i	0.202	0.427292	-0.427292
Gallus_gal|Crax_rubra	0.188	0.427232	-0.427232
Coturnix_j|Crax_rubra	0.195	0.427232	-0.427232
Tachybaptu|Fringilla_	0.209	0.427207	-0.427207
Gallus_gal|Dryocopus_	0.234	0.427026	-0.427026
Coturnix_j|Dryocopus_	0.245	0.427026	-0.427026
Bycanistes|Cacatua_mo	0.221	0.426962	-0.426962
Gavia_stel|Bycanistes	0.176	0.425933	-0.425933
Henicorhin|Pandion_ha	0.236	0.425755	-0.425755
Falco_pere|Larus_domi	0.203	0.425708	-0.425708
Apus_apus_|Aceros_cor	0.201	0.42517	-0.42517
Alectura_l|Balaenicep	0.259	0.424695	-0.424695
Jacana_jac|Otis_tarda	0.182	0.424173	-0.424173
Crax_rubra|Anseranas_	0.18	0.423447	-0.423447
Todiramphu|Otis_tarda	0.193	0.422893	-0.422893
Henicorhin|Petroica_b	0.171	0.421239	-0.421239
Colinus_vi|Anser_albi	0.216	0.421094	-0.421094
Cardinalis|Bycanistes	0.231	0.421037	-0.421037
Eudynamys_|Falco_pere	0.21	0.420428	-0.420428
Petroica_b|Amazona_ba	0.247	0.420343	-0.420343
Anser_albi|Larus_domi	0.212	0.419859	-0.419859
Himatione_|Phodilus_b	0.246	0.419568	-0.419568
Gavia_stel|Pelecanus_	0.157	0.419432	-0.419432
Gavia_stel|Agapornis_	0.21	0.419054	-0.419054
Alectura_l|Aegithalos	0.252	0.41886	-0.41886
Archilochu|Phodilus_b	0.231	0.418836	-0.418836
Gallus_gal|Regulus_ca	0.251	0.417618	-0.417618
Coturnix_j|Regulus_ca	0.251	0.417618	-0.417618
Agelaius_p|Brotogeris	0.239	0.417576	-0.417576
Bubo_bubo_|Aegotheles	0.226	0.416981	-0.416981
Phalacroco|Balaenicep	0.217	0.416933	-0.416933
Apus_apus_|Amazona_ba	0.206	0.41601	-0.41601
Colinus_vi|Falco_pere	0.229	0.415245	-0.415245
Gallus_gal|Phalacroco	0.213	0.414828	-0.414828
Coturnix_j|Phalacroco	0.215	0.414828	-0.414828
Cardinalis|Pelecanus_	0.222	0.414536	-0.414536
Alectura_l|Haematopus	0.212	0.414317	-0.414317
Sylvia_atr|Tregellasi	0.186	0.414182	-0.414182
Cardinalis|Agapornis_	0.258	0.414158	-0.414158
Gavia_stel|Cathartes_	0.152	0.414144	-0.414144
Regulus_ca|Balaenicep	0.272	0.414144	-0.414144
Falco_pere|Pandion_ha	0.216	0.413376	-0.413376
Fulica_atr|Acrocephal	0.238	0.412824	-0.412824
Thraupis_e|Luscinia_c	0.151	0.412573	-0.412573
Pseudopodo|Tregellasi	0.168	0.412439	-0.412439
Thalassarc|Aceros_wal	0.181	0.412156	-0.412156
Crax_rubra|Archilochu	0.229	0.41198	-0.41198
Tachybaptu|Pterogloss	0.208	0.411873	-0.411873
Crax_rubra|Himatione_	0.242	0.411248	-0.411248
Ciconia_ci|Tregellasi	0.219	0.410536	-0.410536
Eurystomus|Otis_tarda	0.196	0.410142	-0.410142
Fulica_atr|Columba_li	0.203	0.410091	-0.410091
Regulus_ca|Aegithalos	0.175	0.408309	-0.408309
Eudynamys_|Henicorhin	0.235	0.40805	-0.40805
Anser_albi|Pandion_ha	0.226	0.407527	-0.407527
Alectura_l|Phylloscop	0.242	0.4075	-0.4075
Anseranas_|Phodilus_b	0.218	0.407369	-0.407369
Anser_albi|Apus_apus_	0.214	0.407345	-0.407345
Gavia_stel|Larus_domi	0.16	0.407299	-0.407299
Gallus_gal|Alectura_l	0.197	0.407066	-0.407066
Coturnix_j|Alectura_l	0.207	0.407066	-0.407066
Alectura_l|Oriolus_ch	0.256	0.406645	-0.406645
Phalacroco|Haematopus	0.172	0.406555	-0.406555
Cathartes_|Aceros_cor	0.189	0.405811	-0.405811
Bombycilla|Bycanistes	0.241	0.405019	-0.405019
Casuarius_|Dryocopus_	0.242	0.404925	-0.404925
Dryocopus_|Balaenicep	0.267	0.404735	-0.404735
Crax_rubra|Balaenicep	0.248	0.404529	-0.404529
Fulica_atr|Pycnonotus	0.229	0.404459	-0.404459
Regulus_ca|Haematopus	0.228	0.403765	-0.403765
Sturnus_se|Melopsitta	0.233	0.403677	-0.403677
Fulica_atr|Fringilla_	0.229	0.403313	-0.403313
Anser_albi|Petroica_b	0.241	0.403011	-0.403011
Garrulus_g|Tregellasi	0.18	0.402905	-0.402905
Colinus_vi|Henicorhin	0.246	0.402867	-0.402867
Cardinalis|Larus_domi	0.222	0.402403	-0.402403
Thraupis_e|Cecropis_d	0.168	0.401702	-0.401702
Passer_mon|Tregellasi	0.172	0.4017	-0.4017
Alectura_l|Nipponia_n	0.207	0.401644	-0.401644
Vanellus_v|Aegotheles	0.185	0.401335	-0.401335
Acanthisit|Arenaria_i	0.206	0.401061	-0.401061
Sylvia_atr|Aegotheles	0.243	0.400971	-0.400971
Botaurus_s|Aegotheles	0.192	0.399987	-0.399987
Pseudopodo|Aegotheles	0.23	0.399227	-0.399227
Tachybaptu|Synthlibor	0.165	0.398855	-0.398855
Crax_rubra|Aegithalos	0.243	0.398694	-0.398694
Bombycilla|Pelecanus_	0.23	0.398518	-0.398518
Thraupis_e|Arenaria_i	0.219	0.39833	-0.39833
Bombycilla|Agapornis_	0.266	0.39814	-0.39814
Ciconia_ci|Aegotheles	0.177	0.397325	-0.397325
Eudynamys_|Mionectes_	0.225	0.397292	-0.397292
Regulus_ca|Phylloscop	0.166	0.396948	-0.396948
Cathartes_|Amazona_ba	0.205	0.39665	-0.39665
Regulus_ca|Oriolus_ch	0.189	0.396093	-0.396093
Casuarius_|Regulus_ca	0.247	0.395517	-0.395517
Gavia_stel|Pandion_ha	0.18	0.394967	-0.394967
Mionectes_|Phaethon_r	0.222	0.39491	-0.39491
Gavia_stel|Apus_apus_	0.168	0.394784	-0.394784
Dryocopus_|Haematopus	0.212	0.394356	-0.394356
Crax_rubra|Haematopus	0.201	0.394151	-0.394151
Phalacroco|Nipponia_n	0.166	0.393882	-0.393882
Casuarius_|Phalacroco	0.206	0.392727	-0.392727
Megalurus_|Bycanistes	0.229	0.392456	-0.392456
Colinus_vi|Mionectes_	0.247	0.392109	-0.392109
Regulus_ca|Nipponia_n	0.234	0.391092	-0.391092
Gavia_stel|Petroica_b	0.213	0.390451	-0.390451
Cardinalis|Pandion_ha	0.24	0.390071	-0.390071
Garrulus_g|Aegotheles	0.237	0.389694	-0.389694
Morus_serr|Aegotheles	0.195	0.389394	-0.389394
Anhinga_ru|Synthlibor	0.18	0.389073	-0.389073
Taeniopygi|Brotogeris	0.233	0.388527	-0.388527
Passer_mon|Aegotheles	0.237	0.388488	-0.388488
Fulica_atr|Pterogloss	0.229	0.387979	-0.387979
Crax_rubra|Phylloscop	0.241	0.387334	-0.387334
Crax_rubra|Oriolus_ch	0.246	0.386479	-0.386479
Bombycilla|Larus_domi	0.23	0.386385	-0.386385
Eudyptes_c|Anseranas_	0.183	0.386141	-0.386141
Megalurus_|Pelecanus_	0.22	0.385956	-0.385956
Megalurus_|Agapornis_	0.25	0.385577	-0.385577
Cardinalis|Petroica_b	0.177	0.385555	-0.385555
Sagittariu|Arenaria_i	0.182	0.384892	-0.384892
Bycanistes|Amazona_ba	0.214	0.384861	-0.384861
Alectura_l|Passer_mon	0.243	0.384805	-0.384805
Turdus_hor|Brotogeris	0.242	0.384518	-0.384518
Pterodroma|Melopsitta	0.199	0.38428	-0.38428
Henicorhin|Phaethon_r	0.23	0.384152	-0.384152
Alectura_l|Morus_serr	0.219	0.383899	-0.383899
Thraupis_e|Acrocephal	0.167	0.383862	-0.383862
Acanthisit|Columba_li	0.221	0.38386	-0.38386
Alectura_l|Garrulus_g	0.247	0.3836	-0.3836
Dryocopus_|Nipponia_n	0.215	0.381683	-0.381683
Crax_rubra|Nipponia_n	0.203	0.381478	-0.381478
Thraupis_e|Columba_li	0.219	0.381129	-0.381129
Tachybaptu|Vireo_oliv	0.209	0.380819	-0.380819
Oriolus_ch|Tregellasi	0.181	0.37986	-0.37986
Phylloscop|Tregellasi	0.171	0.379005	-0.379005
Phalacroco|Morus_serr	0.162	0.376137	-0.376137
Brotogeris|Cacatua_mo	0.168	0.375728	-0.375728
Thraupis_e|Pycnonotus	0.158	0.375497	-0.375497
Alauda_arv|Balaenicep	0.263	0.375448	-0.375448
Fulica_atr|Synthlibor	0.196	0.37496	-0.37496
Eudyptes_c|Archilochu	0.197	0.374675	-0.374675
Thraupis_e|Fringilla_	0.122	0.374351	-0.374351
Alectura_l|Pseudopodo	0.24	0.374066	-0.374066
Bombycilla|Pandion_ha	0.24	0.374053	-0.374053
Eudyptes_c|Himatione_	0.218	0.373942	-0.373942
Megalurus_|Larus_domi	0.219	0.373822	-0.373822
Regulus_ca|Morus_serr	0.232	0.373347	-0.373347
Alectura_l|Botaurus_s	0.221	0.373307	-0.373307
Regulus_ca|Garrulus_g	0.186	0.373048	-0.373048
Alectura_l|Sylvia_atr	0.261	0.372323	-0.372323
Alectura_l|Vanellus_v	0.212	0.371958	-0.371958
Alectura_l|Grus_grus_	0.212	0.371912	-0.371912
Falco_pere|Phaethon_r	0.21	0.371774	-0.371774
Gavia_stel|Pterodroma	0.155	0.371244	-0.371244
Vireo_oliv|Brotogeris	0.234	0.370091	-0.370091
Bombycilla|Petroica_b	0.183	0.369537	-0.369537
Sagittariu|Columba_li	0.189	0.367691	-0.367691
Aegithalos|Tregellasi	0.179	0.367645	-0.367645
Remiz_cons|Balaenicep	0.258	0.367576	-0.367576
Otis_tarda|Pelecanus_	0.168	0.367225	-0.367225
Eudyptes_c|Balaenicep	0.196	0.367224	-0.367224
Oriolus_ch|Aegotheles	0.243	0.366649	-0.366649
Tachybaptu|Turdus_hor	0.22	0.366392	-0.366392
Agelaius_p|Bycanistes	0.222	0.366343	-0.366343
Anser_albi|Phaethon_r	0.212	0.365925	-0.365925
Phylloscop|Aegotheles	0.235	0.365794	-0.365794
Phalacroco|Botaurus_s	0.177	0.365545	-0.365545
Petroica_b|Melopsitta	0.238	0.365073	-0.365073
Alauda_arv|Haematopus	0.219	0.365069	-0.365069
Crax_rubra|Passer_mon	0.241	0.364639	-0.364639
Anser_albi|Sturnus_se	0.224	0.364407	-0.364407
Eudynamys_|Sitta_caro	0.228	0.364278	-0.364278
Phalacroco|Vanellus_v	0.173	0.364196	-0.364196
Phalacroco|Grus_grus_	0.17	0.36415	-0.36415
Dryocopus_|Morus_serr	0.228	0.363939	-0.363939
Crax_rubra|Morus_serr	0.215	0.363733	-0.363733
Thalassarc|Cacatua_mo	0.208	0.363651	-0.363651
Crax_rubra|Garrulus_g	0.242	0.363434	-0.363434
Regulus_ca|Botaurus_s	0.234	0.362755	-0.362755
Tachybaptu|Taeniopygi	0.206	0.362383	-0.362383
Lanius_tep|Balaenicep	0.273	0.362172	-0.362172
Regulus_ca|Sylvia_atr	0.187	0.361771	-0.361771
Acanthisit|Pterogloss	0.235	0.361748	-0.361748
Megalurus_|Pandion_ha	0.234	0.36149	-0.36149
Regulus_ca|Vanellus_v	0.223	0.361407	-0.361407
Eudyptes_c|Aegithalos	0.22	0.361389	-0.361389
Regulus_ca|Grus_grus_	0.228	0.36136	-0.36136
Apus_apus_|Melopsitta	0.196	0.360739	-0.360739
Agelaius_p|Pelecanus_	0.215	0.359842	-0.359842
Agelaius_p|Agapornis_	0.247	0.359464	-0.359464
Colinus_vi|Sitta_caro	0.245	0.359095	-0.359095
Thraupis_e|Pterogloss	0.245	0.359017	-0.359017
Haematopus|Aegotheles	0.184	0.358977	-0.358977
Alauda_arv|Oriolus_ch	0.18	0.357397	-0.357397
Remiz_cons|Haematopus	0.215	0.357198	-0.357198
Eudynamys_|Lanius_tep	0.231	0.357132	-0.357132
Megalurus_|Petroica_b	0.171	0.356974	-0.356974
Fulica_atr|Vireo_oliv	0.228	0.356924	-0.356924
Eudyptes_c|Haematopus	0.155	0.356845	-0.356845
Alectura_l|Bubo_bubo_	0.248	0.356312	-0.356312
Himatione_|Tregellasi	0.173	0.355091	-0.355091
Sitta_caro|Balaenicep	0.262	0.355026	-0.355026
Sturnus_se|Phodilus_b	0.238	0.354906	-0.354906
Aegithalos|Aegotheles	0.238	0.354433	-0.354433
Archilochu|Tregellasi	0.237	0.354359	-0.354359
Crax_rubra|Pseudopodo	0.232	0.3539	-0.3539
Gavia_stel|Phaethon_r	0.167	0.353364	-0.353364
Dryocopus_|Botaurus_s	0.221	0.353346	-0.353346
Crax_rubra|Botaurus_s	0.215	0.353141	-0.353141
Alauda_arv|Nipponia_n	0.219	0.352396	-0.352396
Todiramphu|Falco_pere	0.214	0.352276	-0.352276
Crax_rubra|Sylvia_atr	0.25	0.352157	-0.352157
Dryocopus_|Vanellus_v	0.217	0.351998	-0.351998
Dryocopus_|Grus_grus_	0.213	0.351951	-0.351951
Colinus_vi|Lanius_tep	0.26	0.35195	-0.35195
Gavia_stel|Sturnus_se	0.211	0.351847	-0.351847
Lanius_tep|Haematopus	0.23	0.351793	-0.351793
Crax_rubra|Vanellus_v	0.201	0.351792	-0.351792
Crax_rubra|Grus_grus_	0.2	0.351746	-0.351746
Eudynamys_|Remiz_cons	0.238	0.351728	-0.351728
Eudyptes_c|Phylloscop	0.213	0.350028	-0.350028
Remiz_cons|Oriolus_ch	0.185	0.349526	-0.349526
Sitta_caro|Aegithalos	0.176	0.349191	-0.349191
Eudyptes_c|Oriolus_ch	0.222	0.349173	-0.349173
Acanthisit|Synthlibor	0.21	0.34873	-0.34873
Cardinalis|Phaethon_r	0.232	0.348468	-0.348468
Agelaius_p|Larus_domi	0.217	0.347709	-0.347709
Buteo_bute|Pelecanus_	0.178	0.347244	-0.347244
Cardinalis|Sturnus_se	0.169	0.346951	-0.346951
Colinus_vi|Remiz_cons	0.242	0.346545	-0.346545
Thraupis_e|Synthlibor	0.216	0.345998	-0.345998
Tachybaptu|Buteo_bute	0.168	0.345931	-0.345931
Regulus_ca|Bubo_bubo_	0.261	0.345761	-0.345761
Sitta_caro|Haematopus	0.213	0.344648	-0.344648
Remiz_cons|Nipponia_n	0.216	0.344525	-0.344525
Eudyptes_c|Nipponia_n	0.15	0.344172	-0.344172
Lanius_tep|Oriolus_ch	0.184	0.344121	-0.344121
Eudynamys_|Alauda_arv	0.231	0.343856	-0.343856
Gallus_gal|Sagittariu	0.217	0.343845	-0.343845
Coturnix_j|Sagittariu	0.222	0.343845	-0.343845
Anseranas_|Tregellasi	0.235	0.342892	-0.342892
Fulica_atr|Turdus_hor	0.236	0.342498	-0.342498
Himatione_|Aegotheles	0.235	0.341879	-0.341879
Cathartes_|Melopsitta	0.2	0.34138	-0.34138
Archilochu|Aegotheles	0.213	0.341147	-0.341147
Eurystomus|Falco_pere	0.219	0.339525	-0.339525
Lanius_tep|Nipponia_n	0.234	0.33912	-0.33912
Pterogloss|Brotogeris	0.234	0.339037	-0.339037
Colinus_vi|Alauda_arv	0.246	0.338674	-0.338674
Fulica_atr|Taeniopygi	0.225	0.338489	-0.338489
Sitta_caro|Phylloscop	0.168	0.337831	-0.337831
Taeniopygi|Bycanistes	0.214	0.337293	-0.337293
Sitta_caro|Oriolus_ch	0.181	0.336976	-0.336976
Dryocopus_|Bubo_bubo_	0.246	0.336352	-0.336352
Crax_rubra|Bubo_bubo_	0.232	0.336147	-0.336147
Alectura_l|Luscinia_c	0.233	0.335914	-0.335914
Pterodroma|Phodilus_b	0.211	0.335509	-0.335509
Agelaius_p|Pandion_ha	0.232	0.335377	-0.335377
Buteo_bute|Larus_domi	0.175	0.335111	-0.335111
Alauda_arv|Morus_serr	0.236	0.334651	-0.334651
Alauda_arv|Garrulus_g	0.182	0.334352	-0.334352
Tachybaptu|Agelaius_p	0.211	0.333334	-0.333334
Turdus_hor|Bycanistes	0.228	0.333284	-0.333284
Sagittariu|Synthlibor	0.181	0.332561	-0.332561
Bombycilla|Phaethon_r	0.243	0.33245	-0.33245
Sitta_caro|Nipponia_n	0.22	0.331975	-0.331975
Agelaius_p|Petroica_b	0.166	0.330861	-0.330861
Taeniopygi|Pelecanus_	0.211	0.330792	-0.330792
Thalassarc|Aceros_cor	0.183	0.330711	-0.330711
Taeniopygi|Agapornis_	0.247	0.330414	-0.330414
Gallus_gal|Thraupis_e	0.237	0.330408	-0.330408
Coturnix_j|Thraupis_e	0.246	0.330408	-0.330408
Anseranas_|Aegotheles	0.214	0.329681	-0.329681
Bycanistes|Melopsitta	0.207	0.329591	-0.329591
Thraupis_e|Vireo_oliv	0.165	0.327963	-0.327963
Gallus_gal|Acanthisit	0.239	0.327677	-0.327677
Coturnix_j|Acanthisit	0.249	0.327677	-0.327677
Eudyptes_c|Passer_mon	0.212	0.327334	-0.327334
Turdus_hor|Pelecanus_	0.226	0.326783	-0.326783
Remiz_cons|Morus_serr	0.229	0.32678	-0.32678
Remiz_cons|Garrulus_g	0.184	0.32648	-0.32648
Eudyptes_c|Morus_serr	0.165	0.326427	-0.326427
Turdus_hor|Agapornis_	0.257	0.326405	-0.326405
Eudyptes_c|Garrulus_g	0.22	0.326128	-0.326128
Tachybaptu|Otis_tarda	0.161	0.325951	-0.325951
Alectura_l|Cecropis_d	0.244	0.325044	-0.325044
Alauda_arv|Botaurus_s	0.232	0.324059	-0.324059
Fringilla_|Brotogeris	0.237	0.323703	-0.323703
Alauda_arv|Sylvia_atr	0.179	0.323075	-0.323075
Buteo_bute|Pandion_ha	0.169	0.322779	-0.322779
Alauda_arv|Vanellus_v	0.22	0.322711	-0.322711
Alauda_arv|Grus_grus_	0.223	0.322664	-0.322664
Pycnonotus|Brotogeris	0.239	0.322557	-0.322557
Fulica_atr|Buteo_bute	0.201	0.322037	-0.322037
Mionectes_|Balaenicep	0.261	0.322013	-0.322013
Casuarius_|Sagittariu	0.215	0.321744	-0.321744
Alectura_l|Arenaria_i	0.211	0.321672	-0.321672
Thalassarc|Amazona_ba	0.204	0.32155	-0.32155
Lanius_tep|Morus_serr	0.234	0.321376	-0.321376
Megalurus_|Phaethon_r	0.227	0.319887	-0.319887
Vireo_oliv|Bycanistes	0.224	0.318857	-0.318857
Taeniopygi|Larus_domi	0.211	0.318659	-0.318659
Eudyptes_c|Pseudopodo	0.208	0.316595	-0.316595
Petroica_b|Phodilus_b	0.24	0.316302	-0.316302
Remiz_cons|Botaurus_s	0.223	0.316187	-0.316187
Anhinga_ru|Otis_tarda	0.179	0.316169	-0.316169
Eudyptes_c|Botaurus_s	0.164	0.315835	-0.315835
Crax_rubra|Luscinia_c	0.228	0.315748	-0.315748
Eudyptes_c|Sylvia_atr	0.229	0.314851	-0.314851
Remiz_cons|Vanellus_v	0.221	0.314839	-0.314839
Remiz_cons|Grus_grus_	0.221	0.314793	-0.314793
Turdus_hor|Larus_domi	0.224	0.31465	-0.31465
Eudynamys_|Dryocopus_	0.231	0.314569	-0.314569
Regulus_ca|Cecropis_d	0.181	0.314492	-0.314492
Eudyptes_c|Vanellus_v	0.161	0.314487	-0.314487
Eudyptes_c|Grus_grus_	0.151	0.31444	-0.31444
Sitta_caro|Morus_serr	0.225	0.31423	-0.31423
Acrocephal|Brotogeris	0.25	0.314191	-0.314191
Sitta_caro|Garrulus_g	0.181	0.313931	-0.313931
Phalacroco|Arenaria_i	0.181	0.31391	-0.31391
Thraupis_e|Turdus_hor	0.162	0.313536	-0.313536
Vireo_oliv|Pelecanus_	0.216	0.312357	-0.312357
Alectura_l|Apteryx_ha	0.23	0.312248	-0.312248
Vireo_oliv|Agapornis_	0.245	0.311979	-0.311979
Apus_apus_|Phodilus_b	0.215	0.311968	-0.311968
Anser_albi|Anseranas_	0.178	0.311944	-0.311944
Mionectes_|Haematopus	0.214	0.311634	-0.311634
Henicorhin|Balaenicep	0.266	0.311255	-0.311255
Regulus_ca|Arenaria_i	0.227	0.31112	-0.31112
Lanius_tep|Botaurus_s	0.236	0.310783	-0.310783
Colinus_vi|Crax_rubra	0.195	0.309592	-0.309592
Thraupis_e|Taeniopygi	0.137	0.309527	-0.309527
Fulica_atr|Agelaius_p	0.233	0.309439	-0.309439
Lanius_tep|Vanellus_v	0.23	0.309435	-0.309435
Lanius_tep|Grus_grus_	0.232	0.309388	-0.309388
Colinus_vi|Dryocopus_	0.245	0.309387	-0.309387
Apteryx_ha|Brotogeris	0.244	0.309147	-0.309147
Casuarius_|Thraupis_e	0.237	0.308306	-0.308306
Tachybaptu|Megalurus_	0.214	0.30722	-0.30722
Alectura_l|Acrocephal	0.245	0.307204	-0.307204
Alauda_arv|Bubo_bubo_	0.248	0.307065	-0.307065
Taeniopygi|Pandion_ha	0.221	0.306327	-0.306327
Casuarius_|Acanthisit	0.236	0.305575	-0.305575
Henicorhin|Aegithalos	0.176	0.305419	-0.305419
Eudynamys_|Regulus_ca	0.23	0.30516	-0.30516
Crax_rubra|Cecropis_d	0.243	0.304878	-0.304878
Alectura_l|Columba_li	0.217	0.304471	-0.304471
Sitta_caro|Botaurus_s	0.221	0.303638	-0.303638
Sitta_caro|Sylvia_atr	0.183	0.302654	-0.302654
Eudynamys_|Phalacroco	0.186	0.302371	-0.302371
Turdus_hor|Pandion_ha	0.233	0.302318	-0.302318
Sitta_caro|Vanellus_v	0.22	0.302289	-0.302289
Sitta_caro|Grus_grus_	0.221	0.302243	-0.302243
Fulica_atr|Otis_tarda	0.192	0.302056	-0.302056
Taeniopygi|Petroica_b	0.164	0.301811	-0.301811
Dryocopus_|Arenaria_i	0.223	0.301711	-0.301711
Crax_rubra|Arenaria_i	0.207	0.301506	-0.301506
Gallus_gal|Fulica_atr	0.218	0.301446	-0.301446
Coturnix_j|Fulica_atr	0.224	0.301446	-0.301446
Henicorhin|Haematopus	0.225	0.300876	-0.300876
Anser_albi|Archilochu	0.222	0.300478	-0.300478
Vireo_oliv|Larus_domi	0.215	0.300224	-0.300224
Colinus_vi|Regulus_ca	0.254	0.299978	-0.299978
Anser_albi|Himatione_	0.237	0.299746	-0.299746
Gavia_stel|Anseranas_	0.185	0.299384	-0.299384
Remiz_cons|Bubo_bubo_	0.242	0.299193	-0.299193
Mionectes_|Nipponia_n	0.216	0.298961	-0.298961
Falco_pere|Balaenicep	0.244	0.298876	-0.298876
Eudyptes_c|Bubo_bubo_	0.203	0.298841	-0.298841
Alectura_l|Pycnonotus	0.244	0.298839	-0.298839
Turdus_hor|Petroica_b	0.172	0.297802	-0.297802
Alectura_l|Fringilla_	0.243	0.297693	-0.297693
Colinus_vi|Phalacroco	0.216	0.297188	-0.297188
Regulus_ca|Acrocephal	0.18	0.296652	-0.296652
Cecropis_d|Brotogeris	0.241	0.296352	-0.296352
Acanthisit|Buteo_bute	0.22	0.295806	-0.295806
Tachybaptu|Bombycilla	0.223	0.294657	-0.294657
Synthlibor|Pelecanus_	0.174	0.294321	-0.294321
Henicorhin|Phylloscop	0.17	0.294059	-0.294059
Regulus_ca|Columba_li	0.231	0.293919	-0.293919
Lanius_tep|Bubo_bubo_	0.266	0.293789	-0.293789
Agelaius_p|Phaethon_r	0.226	0.293774	-0.293774
Henicorhin|Oriolus_ch	0.188	0.293204	-0.293204
Thraupis_e|Buteo_bute	0.221	0.293075	-0.293075
Anser_albi|Balaenicep	0.254	0.293027	-0.293027
Cathartes_|Phodilus_b	0.201	0.292609	-0.292609
Agelaius_p|Sturnus_se	0.158	0.292257	-0.292257
Crax_rubra|Apteryx_ha	0.227	0.292082	-0.292082
Sturnus_se|Tregellasi	0.173	0.290429	-0.290429
Colinus_vi|Alectura_l	0.201	0.289426	-0.289426
Falco_pere|Haematopus	0.19	0.288497	-0.288497
Regulus_ca|Pycnonotus	0.168	0.288287	-0.288287
Henicorhin|Nipponia_n	0.225	0.288203	-0.288203
Gavia_stel|Archilochu	0.193	0.287917	-0.287917
Vireo_oliv|Pandion_ha	0.229	0.287891	-0.287891
Pterogloss|Bycanistes	0.212	0.287803	-0.287803
Agapornis_|Phodilus_b	0.233	0.287699	-0.287699
Gallus_gal|Anhinga_ru	0.212	0.287334	-0.287334
Coturnix_j|Anhinga_ru	0.218	0.287334	-0.287334
Anser_albi|Aegithalos	0.24	0.287192	-0.287192
Gavia_stel|Himatione_	0.218	0.287185	-0.287185
Crax_rubra|Acrocephal	0.239	0.287038	-0.287038
Sitta_caro|Bubo_bubo_	0.252	0.286643	-0.286643
Tregellasi|Caprimulgu	0.246	0.285794	-0.285794
Luscinia_c|Brotogeris	0.232	0.285481	-0.285481
Dryocopus_|Columba_li	0.216	0.28451	-0.28451
Crax_rubra|Columba_li	0.213	0.284305	-0.284305
Vireo_oliv|Petroica_b	0.166	0.283375	-0.283375
Fulica_atr|Megalurus_	0.234	0.283326	-0.283326
Anser_albi|Haematopus	0.209	0.282648	-0.282648
Alectura_l|Pterogloss	0.237	0.282359	-0.282359
Cardinalis|Himatione_	0.136	0.282289	-0.282289
Pterogloss|Pelecanus_	0.216	0.281302	-0.281302
Mionectes_|Morus_serr	0.224	0.281216	-0.281216
Pterogloss|Agapornis_	0.241	0.280924	-0.280924
Bycanistes|Phodilus_b	0.215	0.28082	-0.28082
Gavia_stel|Balaenicep	0.2	0.280466	-0.280466
Casuarius_|Fulica_atr	0.227	0.279345	-0.279345
Crax_rubra|Pycnonotus	0.239	0.278673	-0.278673
Tachybaptu|Cardinalis	0.219	0.27864	-0.27864
Eudyptes_c|Luscinia_c	0.204	0.278443	-0.278443
Brotogeris|Melopsitta	0.145	0.278357	-0.278357
Crax_rubra|Fringilla_	0.236	0.277527	-0.277527
Sturnus_se|Aegotheles	0.23	0.277218	-0.277218
Anser_albi|Phylloscop	0.236	0.275831	-0.275831
Acanthisit|Otis_tarda	0.212	0.275826	-0.275826
Falco_pere|Nipponia_n	0.199	0.275824	-0.275824
Phaethon_r|Aegotheles	0.196	0.275701	-0.275701
Cardinalis|Balaenicep	0.263	0.27557	-0.27557
Anser_albi|Oriolus_ch	0.238	0.274977	-0.274977
Gavia_stel|Aegithalos	0.221	0.274631	-0.274631
Thraupis_e|Otis_tarda	0.221	0.273095	-0.273095
Fringilla_|Bycanistes	0.217	0.272469	-0.272469
Alauda_arv|Arenaria_i	0.227	0.272424	-0.272424
Regulus_ca|Pterogloss	0.262	0.271807	-0.271807
Pycnonotus|Bycanistes	0.224	0.271323	-0.271323
Pterodroma|Tregellasi	0.222	0.271032	-0.271032
Fulica_atr|Bombycilla	0.237	0.270763	-0.270763
Mionectes_|Botaurus_s	0.221	0.270624	-0.270624
Henicorhin|Morus_serr	0.232	0.270458	-0.270458
Henicorhin|Garrulus_g	0.183	0.270159	-0.270159
Gavia_stel|Haematopus	0.156	0.270088	-0.270088
Anser_albi|Nipponia_n	0.206	0.269975	-0.269975
Cardinalis|Aegithalos	0.173	0.269735	-0.269735
Alectura_l|Synthlibor	0.212	0.26934	-0.26934
Mionectes_|Vanellus_v	0.217	0.269276	-0.269276
Mionectes_|Grus_grus_	0.215	0.269229	-0.269229
Pterogloss|Larus_domi	0.22	0.269169	-0.269169
Eudyptes_c|Cecropis_d	0.212	0.267572	-0.267572
Thalassarc|Melopsitta	0.196	0.266279	-0.266279
Fringilla_|Pelecanus_	0.211	0.265968	-0.265968
Fringilla_|Agapornis_	0.247	0.26559	-0.26559
Casuarius_|Anhinga_ru	0.216	0.265232	-0.265232
Cardinalis|Haematopus	0.218	0.265192	-0.265192
Pycnonotus|Pelecanus_	0.217	0.264822	-0.264822
Taeniopygi|Phaethon_r	0.22	0.264724	-0.264724
Remiz_cons|Arenaria_i	0.223	0.264553	-0.264553
Pycnonotus|Agapornis_	0.249	0.264444	-0.264444
Eudyptes_c|Arenaria_i	0.166	0.2642	-0.2642
Gavia_stel|Phylloscop	0.215	0.263271	-0.263271
Taeniopygi|Sturnus_se	0.15	0.263207	-0.263207
Acrocephal|Bycanistes	0.236	0.262958	-0.262958
Gavia_stel|Oriolus_ch	0.227	0.262416	-0.262416
Dryocopus_|Pterogloss	0.194	0.262398	-0.262398
Crax_rubra|Pterogloss	0.234	0.262193	-0.262193
Phalacroco|Synthlibor	0.174	0.261578	-0.261578
Tachybaptu|Anser_albi	0.2	0.261183	-0.261183
Turdus_hor|Phaethon_r	0.227	0.260715	-0.260715
Henicorhin|Botaurus_s	0.228	0.259866	-0.259866
Sagittariu|Otis_tarda	0.179	0.259657	-0.259657
Bombycilla|Balaenicep	0.27	0.259553	-0.259553
Turdus_hor|Sturnus_se	0.145	0.259198	-0.259198
Columba_li|Pelecanus_	0.182	0.25919	-0.25919
Lanius_tep|Arenaria_i	0.23	0.259148	-0.259148
Tregellasi|Aceros_wal	0.229	0.259124	-0.259124
Henicorhin|Sylvia_atr	0.189	0.258882	-0.258882
Regulus_ca|Synthlibor	0.221	0.258788	-0.258788
Henicorhin|Vanellus_v	0.224	0.258518	-0.258518
Henicorhin|Grus_grus_	0.225	0.258471	-0.258471
Cardinalis|Phylloscop	0.166	0.258374	-0.258374
Falco_pere|Morus_serr	0.204	0.25808	-0.25808
Apteryx_ha|Bycanistes	0.223	0.257914	-0.257914
Pterodroma|Aegotheles	0.181	0.257821	-0.257821
Cardinalis|Oriolus_ch	0.182	0.25752	-0.25752
Ciconia_ci|Thalassarc	0.145	0.257504	-0.257504
Gavia_stel|Nipponia_n	0.154	0.257415	-0.257415
Pterogloss|Pandion_ha	0.227	0.256837	-0.256837
Acrocephal|Pelecanus_	0.225	0.256457	-0.256457
Acrocephal|Agapornis_	0.259	0.256079	-0.256079
Sitta_caro|Cecropis_d	0.176	0.255375	-0.255375
Tachybaptu|Falco_pere	0.19	0.255334	-0.255334
Alauda_arv|Columba_li	0.225	0.255223	-0.255223
Eudyptes_c|Apteryx_ha	0.203	0.254776	-0.254776
Fulica_atr|Cardinalis	0.24	0.254745	-0.254745
Thraupis_e|Megalurus_	0.157	0.254364	-0.254364
Fringilla_|Larus_domi	0.214	0.253835	-0.253835
Bombycilla|Aegithalos	0.177	0.253718	-0.253718
Mionectes_|Bubo_bubo_	0.246	0.25363	-0.25363
Anser_albi|Passer_mon	0.236	0.253137	-0.253137
Pycnonotus|Larus_domi	0.217	0.252689	-0.252689
Cardinalis|Nipponia_n	0.224	0.252519	-0.252519
Anser_albi|Morus_serr	0.216	0.252231	-0.252231
Sitta_caro|Arenaria_i	0.224	0.252003	-0.252003
Anser_albi|Garrulus_g	0.24	0.251931	-0.251931
Apteryx_ha|Pelecanus_	0.214	0.251413	-0.251413
Alectura_l|Vireo_oliv	0.246	0.251304	-0.251304
Apteryx_ha|Agapornis_	0.257	0.251035	-0.251035
Eudyptes_c|Acrocephal	0.219	0.249732	-0.249732
Alauda_arv|Pycnonotus	0.168	0.249591	-0.249591
Dryocopus_|Synthlibor	0.22	0.24938	-0.24938
Bombycilla|Haematopus	0.229	0.249174	-0.249174
Crax_rubra|Synthlibor	0.204	0.249174	-0.249174
Sylvia_atr|Brotogeris	0.251	0.249073	-0.249073
Apus_apus_|Tregellasi	0.232	0.247492	-0.247492
Falco_pere|Botaurus_s	0.205	0.247487	-0.247487
Remiz_cons|Columba_li	0.221	0.247352	-0.247352
Pseudopodo|Brotogeris	0.235	0.247329	-0.247329
Columba_li|Larus_domi	0.182	0.247057	-0.247057
Eudyptes_c|Columba_li	0.174	0.246999	-0.246999
Megalurus_|Balaenicep	0.261	0.24699	-0.24699
Vireo_oliv|Phaethon_r	0.225	0.246289	-0.246289
Falco_pere|Vanellus_v	0.198	0.246139	-0.246139
Falco_pere|Grus_grus_	0.196	0.246092	-0.246092
Ciconia_ci|Brotogeris	0.199	0.245427	-0.245427
Cecropis_d|Bycanistes	0.228	0.245118	-0.245118
Acrocephal|Larus_domi	0.225	0.244324	-0.244324
Tachybaptu|Henicorhin	0.218	0.242956	-0.242956
Henicorhin|Bubo_bubo_	0.253	0.242872	-0.242872
Anser_albi|Pseudopodo	0.229	0.242398	-0.242398
Bombycilla|Phylloscop	0.17	0.242357	-0.242357
Arenaria_i|Pelecanus_	0.174	0.241989	-0.241989
Lanius_tep|Columba_li	0.233	0.241947	-0.241947
Thraupis_e|Bombycilla	0.17	0.241801	-0.241801
Anser_albi|Botaurus_s	0.215	0.241638	-0.241638
Fringilla_|Pandion_ha	0.226	0.241503	-0.241503
Bombycilla|Oriolus_ch	0.186	0.241502	-0.241502
Eudyptes_c|Pycnonotus	0.209	0.241367	-0.241367
Regulus_ca|Vireo_oliv	0.178	0.240752	-0.240752
Anser_albi|Sylvia_atr	0.248	0.240655	-0.240655
Gavia_stel|Passer_mon	0.217	0.240576	-0.240576
Pycnonotus|Pandion_ha	0.227	0.240357	-0.240357
Anser_albi|Vanellus_v	0.209	0.24029	-0.24029
Anser_albi|Grus_grus_	0.205	0.240243	-0.240243
Eudyptes_c|Fringilla_	0.207	0.240221	-0.240221
Gavia_stel|Morus_serr	0.161	0.23967	-0.23967
Gavia_stel|Garrulus_g	0.219	0.239371	-0.239371
Apteryx_ha|Larus_domi	0.213	0.23928	-0.23928
Cecropis_d|Pelecanus_	0.219	0.238617	-0.238617
Petroica_b|Aegotheles	0.234	0.238614	-0.238614
Cecropis_d|Agapornis_	0.252	0.238239	-0.238239
Garrulus_g|Brotogeris	0.249	0.237796	-0.237796
Sitta_caro|Acrocephal	0.174	0.237535	-0.237535
Fringilla_|Petroica_b	0.167	0.236987	-0.236987
Alectura_l|Turdus_hor	0.244	0.236878	-0.236878
Megalurus_|Haematopus	0.215	0.236611	-0.236611
Passer_mon|Brotogeris	0.239	0.23659	-0.23659
Bombycilla|Nipponia_n	0.23	0.236501	-0.236501
Pycnonotus|Petroica_b	0.169	0.235841	-0.235841
Cardinalis|Passer_mon	0.145	0.23568	-0.23568
Sitta_caro|Columba_li	0.225	0.234802	-0.234802
Cardinalis|Morus_serr	0.227	0.234774	-0.234774
Cardinalis|Garrulus_g	0.178	0.234474	-0.234474
Apus_apus_|Aegotheles	0.18	0.23428	-0.23428
Luscinia_c|Bycanistes	0.218	0.234247	-0.234247
Todiramphu|Phalacroco	0.192	0.234218	-0.234218
Pandion_ha|Aegotheles	0.204	0.234098	-0.234098
Alauda_arv|Pterogloss	0.242	0.233111	-0.233111
Alectura_l|Taeniopygi	0.236	0.232869	-0.232869
Tachybaptu|Mionectes_	0.209	0.232197	-0.232197
Acrocephal|Pandion_ha	0.235	0.231992	-0.231992
Fulica_atr|Falco_pere	0.218	0.23144	-0.23144
Eudynamys_|Sagittariu	0.198	0.231388	-0.231388
Crax_rubra|Vireo_oliv	0.236	0.231138	-0.231138
Arenaria_i|Larus_domi	0.153	0.229856	-0.229856
Gavia_stel|Pseudopodo	0.21	0.229837	-0.229837
Brotogeris|Phodilus_b	0.232	0.229586	-0.229586
Sitta_caro|Pycnonotus	0.169	0.22917	-0.22917
Gavia_stel|Botaurus_s	0.168	0.229078	-0.229078
Megalurus_|Oriolus_ch	0.175	0.228939	-0.228939
Otis_tarda|Balaenicep	0.211	0.228259	-0.228259
Cathartes_|Tregellasi	0.224	0.228132	-0.228132
Gavia_stel|Sylvia_atr	0.228	0.228094	-0.228094
Luscinia_c|Pelecanus_	0.209	0.227747	-0.227747
Gavia_stel|Vanellus_v	0.163	0.227729	-0.227729
Gavia_stel|Grus_grus_	0.153	0.227683	-0.227683
Agelaius_p|Himatione_	0.123	0.227595	-0.227595
Acrocephal|Petroica_b	0.175	0.227476	-0.227476
Luscinia_c|Agapornis_	0.238	0.227368	-0.227368
Apteryx_ha|Pandion_ha	0.223	0.226948	-0.226948
Apteryx_ha|Apus_apus_	0.21	0.226765	-0.226765
Cecropis_d|Larus_domi	0.222	0.226484	-0.226484
Colinus_vi|Sagittariu	0.22	0.226206	-0.226206
Thraupis_e|Cardinalis	0.115	0.225783	-0.225783
Remiz_cons|Pterogloss	0.228	0.22524	-0.22524
Cardinalis|Pseudopodo	0.157	0.224941	-0.224941
Eudyptes_c|Pterogloss	0.203	0.224887	-0.224887
Anser_albi|Bubo_bubo_	0.24	0.224644	-0.224644
Cardinalis|Botaurus_s	0.229	0.224181	-0.224181
Megalurus_|Nipponia_n	0.217	0.223938	-0.223938
Cardinalis|Sylvia_atr	0.183	0.223198	-0.223198
Cardinalis|Vanellus_v	0.222	0.222833	-0.222833
Cardinalis|Grus_grus_	0.225	0.222787	-0.222787
Apteryx_ha|Petroica_b	0.243	0.222432	-0.222432
Larus_domi|Aegotheles	0.188	0.221766	-0.221766
Eurystomus|Phalacroco	0.197	0.221468	-0.221468
Agelaius_p|Balaenicep	0.258	0.220877	-0.220877
Alauda_arv|Synthlibor	0.222	0.220092	-0.220092
Lanius_tep|Pterogloss	0.265	0.219835	-0.219835
Fulica_atr|Henicorhin	0.238	0.219061	-0.219061
Mionectes_|Arenaria_i	0.22	0.218989	-0.218989
Bombycilla|Morus_serr	0.233	0.218757	-0.218757
Bombycilla|Garrulus_g	0.182	0.218457	-0.218457
Eudynamys_|Thraupis_e	0.229	0.21795	-0.21795
Thalassarc|Phodilus_b	0.201	0.217509	-0.217509
Crax_rubra|Turdus_hor	0.238	0.216712	-0.216712
Alectura_l|Buteo_bute	0.218	0.216417	-0.216417
Luscinia_c|Larus_domi	0.213	0.215613	-0.215613
Pterogloss|Phaethon_r	0.222	0.215234	-0.215234
Eudynamys_|Acanthisit	0.224	0.215219	-0.215219
Agelaius_p|Aegithalos	0.163	0.215041	-0.215041
Cathartes_|Aegotheles	0.184	0.214921	-0.214921
Oriolus_ch|Brotogeris	0.249	0.214751	-0.214751
Cecropis_d|Pandion_ha	0.232	0.214152	-0.214152
Phylloscop|Brotogeris	0.238	0.213896	-0.213896
Colinus_vi|Thraupis_e	0.241	0.212768	-0.212768
Crax_rubra|Taeniopygi	0.234	0.212703	-0.212703
Sitta_caro|Pterogloss	0.246	0.21269	-0.21269
Remiz_cons|Synthlibor	0.221	0.212221	-0.212221
Gavia_stel|Bubo_bubo_	0.204	0.212084	-0.212084
Eudyptes_c|Synthlibor	0.163	0.211868	-0.211868
Henicorhin|Cecropis_d	0.176	0.211603	-0.211603
Tregellasi|Cacatua_mo	0.254	0.210619	-0.210619
Agelaius_p|Haematopus	0.213	0.210498	-0.210498
Colinus_vi|Acanthisit	0.243	0.210037	-0.210037
Agapornis_|Aegotheles	0.232	0.210011	-0.210011
Cecropis_d|Petroica_b	0.183	0.209636	-0.209636
Fulica_atr|Mionectes_	0.23	0.208303	-0.208303
Buteo_bute|Balaenicep	0.219	0.208279	-0.208279
Henicorhin|Arenaria_i	0.223	0.208231	-0.208231
Bombycilla|Botaurus_s	0.232	0.208164	-0.208164
Bubo_bubo_|Pelecanus_	0.212	0.207349	-0.207349
Cardinalis|Bubo_bubo_	0.257	0.207187	-0.207187
Bombycilla|Sylvia_atr	0.183	0.20718	-0.20718
Lanius_tep|Synthlibor	0.23	0.206817	-0.206817
Bombycilla|Vanellus_v	0.223	0.206816	-0.206816
Bombycilla|Grus_grus_	0.226	0.206769	-0.206769
Megalurus_|Morus_serr	0.222	0.206194	-0.206194
Megalurus_|Garrulus_g	0.179	0.205894	-0.205894
Regulus_ca|Buteo_bute	0.235	0.205865	-0.205865
Acanthisit|Falco_pere	0.234	0.205209	-0.205209
Otis_tarda|Nipponia_n	0.161	0.205207	-0.205207
Anser_albi|Luscinia_c	0.227	0.204246	-0.204246
Alectura_l|Agelaius_p	0.24	0.203819	-0.203819
Agelaius_p|Phylloscop	0.161	0.203681	-0.203681
Luscinia_c|Pandion_ha	0.225	0.203281	-0.203281
Bycanistes|Aegotheles	0.203	0.203132	-0.203132
Agelaius_p|Oriolus_ch	0.174	0.202826	-0.202826
Aegithalos|Brotogeris	0.244	0.202535	-0.202535
Thraupis_e|Falco_pere	0.239	0.202478	-0.202478
Alauda_arv|Vireo_oliv	0.172	0.202057	-0.202057
Mionectes_|Columba_li	0.226	0.201788	-0.201788
Fringilla_|Phaethon_r	0.223	0.1999	-0.1999
Sitta_caro|Synthlibor	0.216	0.199671	-0.199671
Tachybaptu|Sitta_caro	0.212	0.199184	-0.199184
Luscinia_c|Petroica_b	0.162	0.198765	-0.198765
Pycnonotus|Phaethon_r	0.226	0.198754	-0.198754
Fringilla_|Sturnus_se	0.153	0.198383	-0.198383
Buteo_bute|Haematopus	0.173	0.1979	-0.1979
Sylvia_atr|Bycanistes	0.242	0.197839	-0.197839
Agelaius_p|Nipponia_n	0.215	0.197825	-0.197825
Dryocopus_|Buteo_bute	0.223	0.196456	-0.196456
Alectura_l|Otis_tarda	0.213	0.196436	-0.196436
Crax_rubra|Buteo_bute	0.214	0.196251	-0.196251
Pseudopodo|Bycanistes	0.22	0.196095	-0.196095
Falco_pere|Arenaria_i	0.201	0.195852	-0.195852
Megalurus_|Botaurus_s	0.22	0.195601	-0.195601
Bubo_bubo_|Larus_domi	0.213	0.195215	-0.195215
Megalurus_|Sylvia_atr	0.166	0.194617	-0.194617
Megalurus_|Vanellus_v	0.215	0.194253	-0.194253
Megalurus_|Grus_grus_	0.213	0.194206	-0.194206
Ciconia_ci|Bycanistes	0.175	0.194193	-0.194193
Remiz_cons|Vireo_oliv	0.174	0.194185	-0.194185
Eudyptes_c|Vireo_oliv	0.207	0.193832	-0.193832
Henicorhin|Acrocephal	0.176	0.193763	-0.193763
Anser_albi|Cecropis_d	0.232	0.193376	-0.193376
Gallus_gal|Eurystomus	0.225	0.19336	-0.19336
Coturnix_j|Eurystomus	0.227	0.19336	-0.19336
Tachybaptu|Lanius_tep	0.227	0.192038	-0.192038
Taeniopygi|Balaenicep	0.254	0.191827	-0.191827
Grus_grus_|Pelecanus_	0.163	0.191749	-0.191749
Vanellus_v|Pelecanus_	0.167	0.191703	-0.191703
Gavia_stel|Luscinia_c	0.208	0.191685	-0.191685
Sylvia_atr|Pelecanus_	0.234	0.191338	-0.191338
Bombycilla|Bubo_bubo_	0.26	0.19117	-0.19117
Henicorhin|Columba_li	0.226	0.19103	-0.19103
Sylvia_atr|Agapornis_	0.266	0.19096	-0.19096
Acrocephal|Phaethon_r	0.233	0.190389	-0.190389
Botaurus_s|Pelecanus_	0.175	0.190354	-0.190354
Thraupis_e|Henicorhin	0.167	0.190099	-0.190099
Anser_albi|Arenaria_i	0.213	0.190003	-0.190003
Himatione_|Brotogeris	0.243	0.189981	-0.189981
Pseudopodo|Pelecanus_	0.213	0.189595	-0.189595
Archilochu|Brotogeris	0.23	0.189249	-0.189249
Pseudopodo|Agapornis_	0.246	0.189216	-0.189216
Eudynamys_|Fulica_atr	0.198	0.188988	-0.188988
Lanius_tep|Vireo_oliv	0.168	0.188781	-0.188781
Phalacroco|Otis_tarda	0.175	0.188674	-0.188674
Turdus_hor|Balaenicep	0.265	0.187818	-0.187818
Ciconia_ci|Pelecanus_	0.156	0.187692	-0.187692
Ciconia_ci|Agapornis_	0.211	0.187314	-0.187314
Cardinalis|Luscinia_c	0.159	0.186789	-0.186789
Tachybaptu|Remiz_cons	0.214	0.186634	-0.186634
Garrulus_g|Bycanistes	0.232	0.186562	-0.186562
Taeniopygi|Aegithalos	0.164	0.185991	-0.185991
Regulus_ca|Otis_tarda	0.229	0.185885	-0.185885
Henicorhin|Pycnonotus	0.169	0.185398	-0.185398
Passer_mon|Bycanistes	0.227	0.185356	-0.185356
Apteryx_ha|Phaethon_r	0.22	0.185345	-0.185345
Buteo_bute|Nipponia_n	0.175	0.185227	-0.185227
Apteryx_ha|Sturnus_se	0.242	0.183828	-0.183828
Colinus_vi|Fulica_atr	0.22	0.183806	-0.183806
Crax_rubra|Agelaius_p	0.235	0.183653	-0.183653
Bubo_bubo_|Pandion_ha	0.226	0.182883	-0.182883
Ciconia_ci|Cathartes_	0.152	0.182404	-0.182404
Turdus_hor|Aegithalos	0.173	0.181983	-0.181983
Sitta_caro|Vireo_oliv	0.168	0.181635	-0.181635
Taeniopygi|Haematopus	0.205	0.181448	-0.181448
Agelaius_p|Passer_mon	0.132	0.180986	-0.180986
Gavia_stel|Cecropis_d	0.213	0.180815	-0.180815
Gallus_gal|Todiramphu	0.222	0.18061	-0.18061
Coturnix_j|Todiramphu	0.225	0.18061	-0.18061
Anser_albi|Apteryx_ha	0.227	0.18058	-0.18058
Agelaius_p|Morus_serr	0.222	0.18008	-0.18008
Garrulus_g|Pelecanus_	0.225	0.180061	-0.180061
Agelaius_p|Garrulus_g	0.174	0.179781	-0.179781
Morus_serr|Pelecanus_	0.173	0.179762	-0.179762
Garrulus_g|Agapornis_	0.261	0.179683	-0.179683
Mionectes_|Pterogloss	0.249	0.179676	-0.179676
Eudyptes_c|Turdus_hor	0.217	0.179406	-0.179406
Thraupis_e|Mionectes_	0.23	0.179341	-0.179341
Gallus_gal|Jacana_jac	0.216	0.17933	-0.17933
Coturnix_j|Jacana_jac	0.225	0.17933	-0.17933
Sylvia_atr|Larus_domi	0.23	0.179205	-0.179205
Passer_mon|Pelecanus_	0.224	0.178856	-0.178856
Tachybaptu|Alauda_arv	0.218	0.178762	-0.178762
Falco_pere|Columba_li	0.213	0.178651	-0.178651
Megalurus_|Bubo_bubo_	0.244	0.178607	-0.178607
Passer_mon|Agapornis_	0.252	0.178478	-0.178478
Anseranas_|Brotogeris	0.226	0.177783	-0.177783
Alectura_l|Megalurus_	0.248	0.177705	-0.177705
Tregellasi|Aceros_cor	0.231	0.177679	-0.177679
Pseudopodo|Larus_domi	0.212	0.177461	-0.177461
Gavia_stel|Arenaria_i	0.163	0.177443	-0.177443
Turdus_hor|Haematopus	0.221	0.177439	-0.177439
Dryocopus_|Otis_tarda	0.213	0.176476	-0.176476
Crax_rubra|Otis_tarda	0.21	0.17627	-0.17627
Cardinalis|Cecropis_d	0.175	0.175919	-0.175919
Ciconia_ci|Larus_domi	0.161	0.175559	-0.175559
Anser_albi|Acrocephal	0.238	0.175536	-0.175536
Eudyptes_c|Taeniopygi	0.203	0.175397	-0.175397
Fulica_atr|Sitta_caro	0.231	0.175289	-0.175289
Eudynamys_|Anhinga_ru	0.193	0.174876	-0.174876
Taeniopygi|Phylloscop	0.152	0.174631	-0.174631
Taeniopygi|Oriolus_ch	0.169	0.173776	-0.173776
Vireo_oliv|Balaenicep	0.259	0.173391	-0.173391
Anser_albi|Columba_li	0.22	0.172802	-0.172802
Cecropis_d|Phaethon_r	0.23	0.172549	-0.172549
Cardinalis|Arenaria_i	0.217	0.172547	-0.172547
Melopsitta|Caprimulgu	0.219	0.172547	-0.172547
Casuarius_|Eurystomus	0.228	0.171259	-0.171259
Turdus_hor|Phylloscop	0.164	0.170622	-0.170622
Agelaius_p|Pseudopodo	0.154	0.170248	-0.170248
Turdus_hor|Oriolus_ch	0.186	0.169767	-0.169767
Colinus_vi|Anhinga_ru	0.218	0.169694	-0.169694
Agelaius_p|Botaurus_s	0.221	0.169488	-0.169488
Henicorhin|Pterogloss	0.25	0.168918	-0.168918
Taeniopygi|Nipponia_n	0.212	0.168775	-0.168775
Tregellasi|Amazona_ba	0.244	0.168518	-0.168518
Agelaius_p|Sylvia_atr	0.178	0.168504	-0.168504
Fulica_atr|Lanius_tep	0.244	0.168144	-0.168144
Agelaius_p|Vanellus_v	0.219	0.16814	-0.16814
Agelaius_p|Grus_grus_	0.218	0.168093	-0.168093
Gavia_stel|Apteryx_ha	0.206	0.168019	-0.168019
Garrulus_g|Larus_domi	0.223	0.167928	-0.167928
Morus_serr|Larus_domi	0.175	0.167629	-0.167629
Buteo_bute|Morus_serr	0.181	0.167482	-0.167482
Anser_albi|Pycnonotus	0.235	0.16717	-0.16717
Alauda_arv|Buteo_bute	0.224	0.167169	-0.167169
Regulus_ca|Megalurus_	0.17	0.167154	-0.167154
Sylvia_atr|Pandion_ha	0.244	0.166873	-0.166873
Passer_mon|Larus_domi	0.22	0.166723	-0.166723
Mionectes_|Synthlibor	0.219	0.166657	-0.166657
Anser_albi|Fringilla_	0.231	0.166024	-0.166024
Alectura_l|Bombycilla	0.259	0.165143	-0.165143
Pseudopodo|Pandion_ha	0.23	0.165129	-0.165129
Turdus_hor|Nipponia_n	0.225	0.164766	-0.164766
Oriolus_ch|Bycanistes	0.235	0.163517	-0.163517
Todiramphu|Sagittariu	0.199	0.163236	-0.163236
Ciconia_ci|Pandion_ha	0.179	0.163227	-0.163227
Ciconia_ci|Apus_apus_	0.167	0.163045	-0.163045
Vireo_oliv|Haematopus	0.215	0.163013	-0.163013
Gavia_stel|Acrocephal	0.223	0.162975	-0.162975
Fulica_atr|Remiz_cons	0.233	0.162739	-0.162739
Phylloscop|Bycanistes	0.226	0.162662	-0.162662
Sylvia_atr|Petroica_b	0.18	0.162357	-0.162357
Nipponia_n|Pelecanus_	0.161	0.162017	-0.162017
Luscinia_c|Phaethon_r	0.218	0.161679	-0.161679
Pseudopodo|Petroica_b	0.16	0.160613	-0.160613
Gavia_stel|Columba_li	0.169	0.160242	-0.160242
Luscinia_c|Sturnus_se	0.134	0.160161	-0.160161
Bombycilla|Cecropis_d	0.18	0.159901	-0.159901
Remiz_cons|Buteo_bute	0.221	0.159298	-0.159298
Eudyptes_c|Buteo_bute	0.163	0.158945	-0.158945
Ciconia_ci|Petroica_b	0.215	0.158711	-0.158711
Casuarius_|Todiramphu	0.219	0.158508	-0.158508
Cardinalis|Acrocephal	0.174	0.158079	-0.158079
Crax_rubra|Megalurus_	0.236	0.157539	-0.157539
Casuarius_|Jacana_jac	0.218	0.157228	-0.157228
Oriolus_ch|Pelecanus_	0.227	0.157016	-0.157016
Buteo_bute|Botaurus_s	0.184	0.15689	-0.15689
Oriolus_ch|Agapornis_	0.259	0.156638	-0.156638
Bombycilla|Arenaria_i	0.225	0.156529	-0.156529
Phylloscop|Pelecanus_	0.216	0.156162	-0.156162
Henicorhin|Synthlibor	0.227	0.155899	-0.155899
Phylloscop|Agapornis_	0.251	0.155783	-0.155783
Garrulus_g|Pandion_ha	0.233	0.155596	-0.155596
Buteo_bute|Vanellus_v	0.18	0.155542	-0.155542
Buteo_bute|Grus_grus_	0.173	0.155495	-0.155495
Synthlibor|Balaenicep	0.213	0.155355	-0.155355
Cardinalis|Columba_li	0.229	0.155346	-0.155346
Fulica_atr|Alauda_arv	0.233	0.154868	-0.154868
Gavia_stel|Pycnonotus	0.214	0.15461	-0.15461
Passer_mon|Pandion_ha	0.232	0.15439	-0.15439
Lanius_tep|Buteo_bute	0.239	0.153893	-0.153893
Gavia_stel|Fringilla_	0.209	0.153464	-0.153464
Thalassarc|Tregellasi	0.219	0.153032	-0.153032
Agelaius_p|Bubo_bubo_	0.247	0.152494	-0.152494
Brotogeris|Aegotheles	0.225	0.151898	-0.151898
Aegithalos|Bycanistes	0.233	0.151301	-0.151301
Garrulus_g|Petroica_b	0.176	0.15108	-0.15108
Taeniopygi|Morus_serr	0.22	0.15103	-0.15103
Taeniopygi|Garrulus_g	0.167	0.150731	-0.150731
Anser_albi|Pterogloss	0.24	0.15069	-0.15069
Eurystomus|Sagittariu	0.199	0.150485	-0.150485
Vireo_oliv|Nipponia_n	0.22	0.150339	-0.150339
Passer_mon|Petroica_b	0.171	0.149874	-0.149874
Cardinalis|Pycnonotus	0.168	0.149713	-0.149713
Tachybaptu|Crax_rubra	0.197	0.149681	-0.149681
Tachybaptu|Dryocopus_	0.214	0.149475	-0.149475
Haematopus|Pelecanus_	0.166	0.149344	-0.149344
Alectura_l|Cardinalis	0.243	0.149125	-0.149125
Cardinalis|Fringilla_	0.135	0.148567	-0.148567
Alauda_arv|Otis_tarda	0.228	0.147189	-0.147189
Turdus_hor|Morus_serr	0.236	0.147022	-0.147022
Sitta_caro|Buteo_bute	0.228	0.146748	-0.146748
Turdus_hor|Garrulus_g	0.176	0.146722	-0.146722
Eudyptes_c|Agelaius_p	0.214	0.146347	-0.146347
Thraupis_e|Sitta_caro	0.166	0.146327	-0.146327
Synthlibor|Haematopus	0.152	0.144977	-0.144977
Crax_rubra|Bombycilla	0.25	0.144977	-0.144977
Oriolus_ch|Larus_domi	0.227	0.144883	-0.144883
Aegithalos|Pelecanus_	0.224	0.144801	-0.144801
Aegithalos|Agapornis_	0.258	0.144423	-0.144423
Phylloscop|Larus_domi	0.218	0.144028	-0.144028
Megalurus_|Arenaria_i	0.218	0.143966	-0.143966
Falco_pere|Synthlibor	0.204	0.143521	-0.143521
Pterogloss|Balaenicep	0.264	0.142337	-0.142337
Bombycilla|Acrocephal	0.177	0.142062	-0.142062
Bubo_bubo_|Phaethon_r	0.217	0.14128	-0.14128
Taeniopygi|Pseudopodo	0.151	0.141198	-0.141198
Taeniopygi|Botaurus_s	0.213	0.140438	-0.140438
Tachybaptu|Regulus_ca	0.222	0.140066	-0.140066
Thalassarc|Aegotheles	0.177	0.139821	-0.139821
Ciconia_ci|Pterodroma	0.155	0.139504	-0.139504
Taeniopygi|Sylvia_atr	0.17	0.139454	-0.139454
Bombycilla|Columba_li	0.233	0.139328	-0.139328
Remiz_cons|Otis_tarda	0.218	0.139317	-0.139317
Thraupis_e|Lanius_tep	0.185	0.139182	-0.139182
Taeniopygi|Vanellus_v	0.208	0.13909	-0.13909
Taeniopygi|Grus_grus_	0.208	0.139043	-0.139043
Eudyptes_c|Otis_tarda	0.156	0.138965	-0.138965
Himatione_|Bycanistes	0.225	0.138747	-0.138747
Gavia_stel|Pterogloss	0.215	0.13813	-0.13813
Archilochu|Bycanistes	0.214	0.138015	-0.138015
Henicorhin|Vireo_oliv	0.181	0.137863	-0.137863
Anser_albi|Synthlibor	0.207	0.137672	-0.137672
Tachybaptu|Phalacroco	0.163	0.137277	-0.137277
Turdus_hor|Botaurus_s	0.231	0.136429	-0.136429
Turdus_hor|Sylvia_atr	0.182	0.135445	-0.135445
Turdus_hor|Vanellus_v	0.223	0.135081	-0.135081
Turdus_hor|Grus_grus_	0.224	0.135034	-0.135034
Lanius_tep|Otis_tarda	0.23	0.133913	-0.133913
Thraupis_e|Remiz_cons	0.16	0.133778	-0.133778
Fringilla_|Himatione_	0.124	0.133722	-0.133722
Bombycilla|Pycnonotus	0.171	0.133696	-0.133696
Cardinalis|Pterogloss	0.254	0.133234	-0.133234
Aegithalos|Larus_domi	0.227	0.132667	-0.132667
Vireo_oliv|Morus_serr	0.221	0.132595	-0.132595
Oriolus_ch|Pandion_ha	0.238	0.132551	-0.132551
Synthlibor|Nipponia_n	0.165	0.132304	-0.132304
Himatione_|Pelecanus_	0.221	0.132247	-0.132247
Agelaius_p|Luscinia_c	0.15	0.132096	-0.132096
Pterogloss|Haematopus	0.215	0.131958	-0.131958
Himatione_|Agapornis_	0.252	0.131869	-0.131869
Phylloscop|Pandion_ha	0.234	0.131696	-0.131696
Alectura_l|Anser_albi	0.206	0.131668	-0.131668
Archilochu|Pelecanus_	0.202	0.131515	-0.131515
Archilochu|Agapornis_	0.237	0.131137	-0.131137
Tachybaptu|Alectura_l	0.207	0.129515	-0.129515
Crax_rubra|Cardinalis	0.245	0.128959	-0.128959
Alauda_arv|Megalurus_	0.155	0.128458	-0.128458
Oriolus_ch|Petroica_b	0.179	0.128035	-0.128035
Anhinga_ru|Phalacroco	0.163	0.127495	-0.127495
Phylloscop|Petroica_b	0.169	0.12718	-0.12718
Fringilla_|Balaenicep	0.255	0.127003	-0.127003
Sitta_caro|Otis_tarda	0.219	0.126767	-0.126767
Megalurus_|Columba_li	0.222	0.126765	-0.126765
Anseranas_|Bycanistes	0.205	0.126549	-0.126549
Thraupis_e|Alauda_arv	0.164	0.125906	-0.125906
Pycnonotus|Balaenicep	0.258	0.125857	-0.125857
Alectura_l|Falco_pere	0.24	0.125819	-0.125819
Fulica_atr|Dryocopus_	0.229	0.125581	-0.125581
Sturnus_se|Brotogeris	0.234	0.12532	-0.12532
Sylvia_atr|Phaethon_r	0.241	0.12527	-0.12527
Gavia_stel|Synthlibor	0.16	0.125111	-0.125111
Pseudopodo|Phaethon_r	0.221	0.123526	-0.123526
Taeniopygi|Bubo_bubo_	0.246	0.123444	-0.123444
Pseudopodo|Sturnus_se	0.141	0.122009	-0.122009
Vireo_oliv|Botaurus_s	0.225	0.122002	-0.122002
Ciconia_ci|Phaethon_r	0.168	0.121624	-0.121624
Agelaius_p|Cecropis_d	0.165	0.121225	-0.121225
Fringilla_|Aegithalos	0.166	0.121168	-0.121168
Megalurus_|Pycnonotus	0.154	0.121133	-0.121133
Vireo_oliv|Vanellus_v	0.213	0.120654	-0.120654
Vireo_oliv|Grus_grus_	0.216	0.120608	-0.120608
Aegithalos|Pandion_ha	0.237	0.120335	-0.120335
Eudyptes_c|Megalurus_	0.213	0.120234	-0.120234
Columba_li|Balaenicep	0.224	0.120225	-0.120225
Cardinalis|Synthlibor	0.22	0.120215	-0.120215
Himatione_|Larus_domi	0.22	0.120114	-0.120114
Ciconia_ci|Sturnus_se	0.214	0.120107	-0.120107
Anseranas_|Pelecanus_	0.193	0.120048	-0.120048
Apteryx_ha|Archilochu	0.234	0.119898	-0.119898
Anseranas_|Agapornis_	0.233	0.11967	-0.11967
Anser_albi|Vireo_oliv	0.226	0.119636	-0.119636
Turdus_hor|Bubo_bubo_	0.252	0.119435	-0.119435
Archilochu|Larus_domi	0.202	0.119382	-0.119382
Pterogloss|Nipponia_n	0.216	0.119285	-0.119285
Apteryx_ha|Himatione_	0.246	0.119166	-0.119166
Agelaius_p|Arenaria_i	0.213	0.117853	-0.117853
Gallus_gal|Colinus_vi	0.152	0.11764	-0.11764
Coturnix_j|Colinus_vi	0.164	0.11764	-0.11764
Acrocephal|Balaenicep	0.267	0.117491	-0.117491
Amazona_ba|Caprimulgu	0.228	0.117276	-0.117276
Bombycilla|Pterogloss	0.264	0.117216	-0.117216
Fringilla_|Haematopus	0.208	0.116624	-0.116624
Fulica_atr|Regulus_ca	0.239	0.116172	-0.116172
Aegithalos|Petroica_b	0.172	0.115819	-0.115819
Pycnonotus|Haematopus	0.213	0.115478	-0.115478
Regulus_ca|Falco_pere	0.248	0.115268	-0.115268
Garrulus_g|Phaethon_r	0.232	0.113993	-0.113993
Mionectes_|Buteo_bute	0.225	0.113734	-0.113734
Alectura_l|Henicorhin	0.241	0.113441	-0.113441
Fulica_atr|Phalacroco	0.189	0.113382	-0.113382
Tregellasi|Melopsitta	0.239	0.113247	-0.113247
Passer_mon|Phaethon_r	0.229	0.112788	-0.112788
Gallus_gal|Eudynamys_	0.218	0.112457	-0.112457
Coturnix_j|Eudynamys_	0.222	0.112457	-0.112457
Apteryx_ha|Balaenicep	0.254	0.112447	-0.112447
Crax_rubra|Anser_albi	0.206	0.111502	-0.111502
Passer_mon|Sturnus_se	0.156	0.11127	-0.11127
Columba_li|Haematopus	0.177	0.109846	-0.109846
Fringilla_|Phylloscop	0.155	0.109807	-0.109807
Fringilla_|Oriolus_ch	0.179	0.108952	-0.108952
Aceros_cor|Caprimulgu	0.22	0.108115	-0.108115
Sitta_caro|Megalurus_	0.168	0.108036	-0.108036
Anseranas_|Larus_domi	0.19	0.107915	-0.107915
Pycnonotus|Oriolus_ch	0.179	0.107806	-0.107806
Himatione_|Pandion_ha	0.236	0.107781	-0.107781
Eudyptes_c|Bombycilla	0.227	0.107671	-0.107671
Acrocephal|Haematopus	0.221	0.107113	-0.107113
[truncated: 2,279 more rows]

## Sheet: Family Representatives
Species pairs	Alignment differences	Residual differences
Ciconia_ci|Gavia_stel	0.14	0.23174
Ciconia_ci|Eudyptes_c	0.14	0.318497
Ciconia_ci|Tachybaptu	0.148	0.505483
Ciconia_ci|Phoenicopt	0.13	-0.814556
Ciconia_ci|Pelagodrom	0.147	-0.727761
Ciconia_ci|Thalassarc	0.145	-0.257504
Ciconia_ci|Pterodroma	0.155	-0.139504
Ciconia_ci|Cathartes_	0.152	-0.182404
Ciconia_ci|Gallus_gal	0.204	0.783035
Ciconia_ci|Coturnix_j	0.213	0.783035
Ciconia_ci|Colinus_vi	0.209	0.665395
Ciconia_ci|Alectura_l	0.205	0.375969
Ciconia_ci|Crax_rubra	0.197	0.355803
Ciconia_ci|Anser_albi	0.202	0.2443
Ciconia_ci|Anseranas_	0.183	-0.067644
Ciconia_ci|Apteryx_ha	0.206	0.0637206
Ciconia_ci|Casuarius_	0.202	0.760933
Ciconia_ci|Apus_apus_	0.167	-0.163045
Ciconia_ci|Archilochu	0.194	-0.0561776
Ciconia_ci|Eudynamys_	0.179	0.670577
Ciconia_ci|Fulica_atr	0.185	0.481589
Ciconia_ci|Agelaius_p	0.21	0.17215
Ciconia_ci|Thraupis_e	0.206	0.452627
Ciconia_ci|Cardinalis	0.216	0.226844
Ciconia_ci|Fringilla_	0.209	0.0782761
Ciconia_ci|Himatione_	0.218	-0.0554456
Ciconia_ci|Passer_mon	0.217	-0.00883661
Ciconia_ci|Taeniopygi	0.205	0.1431
Ciconia_ci|Luscinia_c	0.205	0.0400543
Ciconia_ci|Pseudopodo	0.212	0.00190228
Ciconia_ci|Turdus_hor	0.222	0.139091
Ciconia_ci|Sturnus_se	0.214	-0.120107
Ciconia_ci|Bombycilla	0.224	0.210826
Ciconia_ci|Regulus_ca	0.223	0.365417
Ciconia_ci|Henicorhin	0.217	0.262528
Ciconia_ci|Sitta_caro	0.212	0.3063
Ciconia_ci|Aegithalos	0.219	-0.0428917
Ciconia_ci|Phylloscop	0.213	-0.0315308
Ciconia_ci|Acrocephal	0.22	0.0687646
Ciconia_ci|Cecropis_d	0.213	0.0509248
Ciconia_ci|Alauda_arv	0.214	0.326721
Ciconia_ci|Megalurus_	0.214	0.198263
Ciconia_ci|Pycnonotus	0.213	0.0771301
Ciconia_ci|Sylvia_atr	0.223	0.00364582
Ciconia_ci|Remiz_cons	0.208	0.31885
Ciconia_ci|Garrulus_g	0.217	-0.00763089
Ciconia_ci|Lanius_tep	0.226	0.313445
Ciconia_ci|Oriolus_ch	0.222	-0.0306762
Ciconia_ci|Vireo_oliv	0.209	0.124664
Ciconia_ci|Tregellasi	0.219	-0.410536
Ciconia_ci|Petroica_b	0.215	-0.158711
Ciconia_ci|Mionectes_	0.211	0.273286
Ciconia_ci|Acanthisit	0.201	0.455358
Ciconia_ci|Dryocopus_	0.209	0.356008
Ciconia_ci|Pterogloss	0.209	0.0936099
Ciconia_ci|Aceros_cor	0.179	-0.588215
Ciconia_ci|Aceros_wal	0.178	-0.66966
Ciconia_ci|Bycanistes	0.175	-0.194193
Ciconia_ci|Ceryle_rud	0.183	1.33464
Ciconia_ci|Todiramphu	0.182	0.602425
Ciconia_ci|Eurystomus	0.187	0.589674
Ciconia_ci|Amazona_ba	0.197	-0.579054
Ciconia_ci|Brotogeris	0.199	-0.245427
Ciconia_ci|Melopsitta	0.188	-0.523784
Ciconia_ci|Agapornis_	0.211	-0.187314
Ciconia_ci|Cacatua_mo	0.201	-0.621155
Ciconia_ci|Bubo_bubo_	0.207	0.0196562
Ciconia_ci|Caprimulgu	0.2	-0.69633
Ciconia_ci|Phodilus_b	0.198	-0.475013
Ciconia_ci|Falco_pere	0.192	0.250149
Ciconia_ci|Phaethon_r	0.168	-0.121624
Ciconia_ci|Buteo_bute	0.167	0.159552
Ciconia_ci|Pandion_ha	0.179	-0.163227
Ciconia_ci|Sagittariu	0.172	0.439189
Ciconia_ci|Columba_li	0.169	0.071498
Ciconia_ci|Anhinga_ru	0.165	0.495701
Ciconia_ci|Phalacroco	0.162	0.368207
Ciconia_ci|Morus_serr	0.164	-0.00793056
Ciconia_ci|Arenaria_i	0.161	0.0542969
Ciconia_ci|Jacana_jac	0.176	0.603705
Ciconia_ci|Larus_domi	0.161	-0.175559
Ciconia_ci|Synthlibor	0.164	0.106629
Ciconia_ci|Haematopus	0.153	-0.0383481
Ciconia_ci|Vanellus_v	0.16	0.00401027
Ciconia_ci|Dupetor_fl	0.164	0.712009
Ciconia_ci|Botaurus_s	0.164	0.00266213
Ciconia_ci|Aegotheles	0.177	-0.397325
Ciconia_ci|Grus_grus_	0.147	0.00405689
Ciconia_ci|Otis_tarda	0.158	0.179532
Ciconia_ci|Nipponia_n	0.149	-0.025675
Ciconia_ci|Pelecanus_	0.156	-0.187692
Ciconia_ci|Balaenicep	0.192	-0.0487267
Gavia_stel|Eudyptes_c	0.142	0.0867572
Gavia_stel|Tachybaptu	0.15	0.273744
Gavia_stel|Phoenicopt	0.131	-1.0463
Gavia_stel|Pelagodrom	0.148	-0.959501
Gavia_stel|Thalassarc	0.148	-0.489244
Gavia_stel|Pterodroma	0.155	-0.371244
Gavia_stel|Cathartes_	0.152	-0.414144
Gavia_stel|Gallus_gal	0.203	0.551295
Gavia_stel|Coturnix_j	0.211	0.551295
Gavia_stel|Colinus_vi	0.208	0.433655
Gavia_stel|Alectura_l	0.208	0.144229
Gavia_stel|Crax_rubra	0.201	0.124063
Gavia_stel|Anser_albi	0.202	0.0125606
Gavia_stel|Anseranas_	0.185	-0.299384
Gavia_stel|Apteryx_ha	0.206	-0.168019
Gavia_stel|Casuarius_	0.201	0.529194
Gavia_stel|Apus_apus_	0.168	-0.394784
Gavia_stel|Archilochu	0.193	-0.287917
Gavia_stel|Eudynamys_	0.178	0.438838
Gavia_stel|Fulica_atr	0.185	0.249849
Gavia_stel|Agelaius_p	0.213	-0.05959
Gavia_stel|Thraupis_e	0.212	0.220887
Gavia_stel|Cardinalis	0.22	-0.00489614
Gavia_stel|Fringilla_	0.209	-0.153464
Gavia_stel|Himatione_	0.218	-0.287185
Gavia_stel|Passer_mon	0.217	-0.240576
Gavia_stel|Taeniopygi	0.208	-0.0886399
Gavia_stel|Luscinia_c	0.208	-0.191685
Gavia_stel|Pseudopodo	0.21	-0.229837
Gavia_stel|Turdus_hor	0.22	-0.0926488
Gavia_stel|Sturnus_se	0.211	-0.351847
Gavia_stel|Bombycilla	0.226	-0.0209137
Gavia_stel|Regulus_ca	0.224	0.133677
Gavia_stel|Henicorhin	0.219	0.030788
Gavia_stel|Sitta_caro	0.218	0.07456
Gavia_stel|Aegithalos	0.221	-0.274631
Gavia_stel|Phylloscop	0.215	-0.263271
Gavia_stel|Acrocephal	0.223	-0.162975
Gavia_stel|Cecropis_d	0.213	-0.180815
Gavia_stel|Alauda_arv	0.214	0.0949812
Gavia_stel|Megalurus_	0.212	-0.0334765
Gavia_stel|Pycnonotus	0.214	-0.15461
Gavia_stel|Sylvia_atr	0.228	-0.228094
Gavia_stel|Remiz_cons	0.213	0.0871098
Gavia_stel|Garrulus_g	0.219	-0.239371
Gavia_stel|Lanius_tep	0.225	0.0817054
Gavia_stel|Oriolus_ch	0.227	-0.262416
Gavia_stel|Vireo_oliv	0.211	-0.107075
Gavia_stel|Tregellasi	0.217	-0.642276
Gavia_stel|Petroica_b	0.213	-0.390451
Gavia_stel|Mionectes_	0.21	0.0415461
Gavia_stel|Acanthisit	0.203	0.223618
Gavia_stel|Dryocopus_	0.212	0.124269
Gavia_stel|Pterogloss	0.215	-0.13813
Gavia_stel|Aceros_cor	0.183	-0.819955
Gavia_stel|Aceros_wal	0.186	-0.9014
Gavia_stel|Bycanistes	0.176	-0.425933
Gavia_stel|Ceryle_rud	0.185	1.1029
Gavia_stel|Todiramphu	0.187	0.370685
Gavia_stel|Eurystomus	0.189	0.357935
Gavia_stel|Amazona_ba	0.194	-0.810794
Gavia_stel|Brotogeris	0.197	-0.477166
Gavia_stel|Melopsitta	0.19	-0.755523
Gavia_stel|Agapornis_	0.21	-0.419054
Gavia_stel|Cacatua_mo	0.199	-0.852895
Gavia_stel|Bubo_bubo_	0.204	-0.212084
Gavia_stel|Caprimulgu	0.202	-0.92807
Gavia_stel|Phodilus_b	0.201	-0.706753
Gavia_stel|Falco_pere	0.196	0.0184096
Gavia_stel|Phaethon_r	0.167	-0.353364
Gavia_stel|Buteo_bute	0.164	-0.0721878
Gavia_stel|Pandion_ha	0.18	-0.394967
Gavia_stel|Sagittariu	0.169	0.20745
Gavia_stel|Columba_li	0.169	-0.160242
Gavia_stel|Anhinga_ru	0.167	0.263961
Gavia_stel|Phalacroco	0.165	0.136467
Gavia_stel|Morus_serr	0.161	-0.23967
Gavia_stel|Arenaria_i	0.163	-0.177443
Gavia_stel|Jacana_jac	0.177	0.371965
Gavia_stel|Larus_domi	0.16	-0.407299
Gavia_stel|Synthlibor	0.16	-0.125111
Gavia_stel|Haematopus	0.156	-0.270088
Gavia_stel|Vanellus_v	0.163	-0.227729
Gavia_stel|Dupetor_fl	0.17	0.480269
Gavia_stel|Botaurus_s	0.168	-0.229078
Gavia_stel|Aegotheles	0.177	-0.629065
Gavia_stel|Grus_grus_	0.153	-0.227683
Gavia_stel|Otis_tarda	0.158	-0.0522073
Gavia_stel|Nipponia_n	0.154	-0.257415
Gavia_stel|Pelecanus_	0.157	-0.419432
Gavia_stel|Balaenicep	0.2	-0.280466
Eudyptes_c|Tachybaptu	0.145	0.186986
Eudyptes_c|Phoenicopt	0.132	-1.13305
Eudyptes_c|Pelagodrom	0.147	-1.04626
Eudyptes_c|Thalassarc	0.151	-0.576001
Eudyptes_c|Pterodroma	0.158	-0.458001
Eudyptes_c|Cathartes_	0.154	-0.500901
Eudyptes_c|Gallus_gal	0.202	0.464538
Eudyptes_c|Coturnix_j	0.21	0.464538
Eudyptes_c|Colinus_vi	0.206	0.346898
Eudyptes_c|Alectura_l	0.203	0.0574718
Eudyptes_c|Crax_rubra	0.199	0.0373058
Eudyptes_c|Anser_albi	0.202	-0.0741966
Eudyptes_c|Anseranas_	0.183	-0.386141
Eudyptes_c|Apteryx_ha	0.203	-0.254776
Eudyptes_c|Casuarius_	0.2	0.442437
Eudyptes_c|Apus_apus_	0.169	-0.481542
Eudyptes_c|Archilochu	0.197	-0.374675
Eudyptes_c|Eudynamys_	0.18	0.35208
Eudyptes_c|Fulica_atr	0.181	0.163092
Eudyptes_c|Agelaius_p	0.214	-0.146347
Eudyptes_c|Thraupis_e	0.21	0.13413
Eudyptes_c|Cardinalis	0.22	-0.0916533
Eudyptes_c|Fringilla_	0.207	-0.240221
Eudyptes_c|Himatione_	0.218	-0.373942
Eudyptes_c|Passer_mon	0.212	-0.327334
Eudyptes_c|Taeniopygi	0.203	-0.175397
Eudyptes_c|Luscinia_c	0.204	-0.278443
Eudyptes_c|Pseudopodo	0.208	-0.316595
Eudyptes_c|Turdus_hor	0.217	-0.179406
Eudyptes_c|Sturnus_se	0.211	-0.438604
Eudyptes_c|Bombycilla	0.227	-0.107671
Eudyptes_c|Regulus_ca	0.224	0.04692
Eudyptes_c|Henicorhin	0.216	-0.0559691
Eudyptes_c|Sitta_caro	0.217	-0.0121972
Eudyptes_c|Aegithalos	0.22	-0.361389
Eudyptes_c|Phylloscop	0.213	-0.350028
Eudyptes_c|Acrocephal	0.219	-0.249732
Eudyptes_c|Cecropis_d	0.212	-0.267572
Eudyptes_c|Alauda_arv	0.214	0.00822401
Eudyptes_c|Megalurus_	0.213	-0.120234
Eudyptes_c|Pycnonotus	0.209	-0.241367
Eudyptes_c|Sylvia_atr	0.229	-0.314851
Eudyptes_c|Remiz_cons	0.206	0.000352583
Eudyptes_c|Garrulus_g	0.22	-0.326128
Eudyptes_c|Lanius_tep	0.227	-0.00505183
Eudyptes_c|Oriolus_ch	0.222	-0.349173
Eudyptes_c|Vireo_oliv	0.207	-0.193832
Eudyptes_c|Tregellasi	0.217	-0.729033
Eudyptes_c|Petroica_b	0.217	-0.477208
Eudyptes_c|Mionectes_	0.211	-0.0452111
Eudyptes_c|Acanthisit	0.196	0.136861
Eudyptes_c|Dryocopus_	0.206	0.0375114
Eudyptes_c|Pterogloss	0.203	-0.224887
Eudyptes_c|Aceros_cor	0.18	-0.906712
Eudyptes_c|Aceros_wal	0.178	-0.988157
Eudyptes_c|Bycanistes	0.173	-0.51269
Eudyptes_c|Ceryle_rud	0.182	1.01614
Eudyptes_c|Todiramphu	0.183	0.283928
Eudyptes_c|Eurystomus	0.186	0.271177
Eudyptes_c|Amazona_ba	0.2	-0.897551
Eudyptes_c|Brotogeris	0.198	-0.563924
Eudyptes_c|Melopsitta	0.19	-0.842281
Eudyptes_c|Agapornis_	0.208	-0.505811
Eudyptes_c|Cacatua_mo	0.208	-0.939652
Eudyptes_c|Bubo_bubo_	0.203	-0.298841
Eudyptes_c|Caprimulgu	0.2	-1.01483
Eudyptes_c|Phodilus_b	0.194	-0.79351
Eudyptes_c|Falco_pere	0.189	-0.0683476
Eudyptes_c|Phaethon_r	0.167	-0.440121
Eudyptes_c|Buteo_bute	0.163	-0.158945
Eudyptes_c|Pandion_ha	0.177	-0.481724
Eudyptes_c|Sagittariu	0.168	0.120692
Eudyptes_c|Columba_li	0.174	-0.246999
Eudyptes_c|Anhinga_ru	0.165	0.177204
Eudyptes_c|Phalacroco	0.167	0.0497097
Eudyptes_c|Morus_serr	0.165	-0.326427
Eudyptes_c|Arenaria_i	0.166	-0.2642
Eudyptes_c|Jacana_jac	0.171	0.285208
Eudyptes_c|Larus_domi	0.166	-0.494056
Eudyptes_c|Synthlibor	0.163	-0.211868
Eudyptes_c|Haematopus	0.155	-0.356845
Eudyptes_c|Vanellus_v	0.161	-0.314487
Eudyptes_c|Dupetor_fl	0.168	0.393512
Eudyptes_c|Botaurus_s	0.164	-0.315835
Eudyptes_c|Aegotheles	0.174	-0.715822
Eudyptes_c|Grus_grus_	0.151	-0.31444
Eudyptes_c|Otis_tarda	0.156	-0.138965
Eudyptes_c|Nipponia_n	0.15	-0.344172
Eudyptes_c|Pelecanus_	0.157	-0.506189
Eudyptes_c|Balaenicep	0.196	-0.367224
Tachybaptu|Phoenicopt	0.125	-1.32004
Tachybaptu|Pelagodrom	0.152	-1.23324
Tachybaptu|Thalassarc	0.153	-0.762988
Tachybaptu|Pterodroma	0.157	-0.644988
Tachybaptu|Cathartes_	0.153	-0.687887
Tachybaptu|Gallus_gal	0.2	0.277551
Tachybaptu|Coturnix_j	0.205	0.277551
Tachybaptu|Colinus_vi	0.206	0.159912
Tachybaptu|Alectura_l	0.207	-0.129515
Tachybaptu|Crax_rubra	0.197	-0.149681
Tachybaptu|Anser_albi	0.2	-0.261183
Tachybaptu|Anseranas_	0.179	-0.573127
Tachybaptu|Apteryx_ha	0.203	-0.441763
Tachybaptu|Casuarius_	0.202	0.25545
Tachybaptu|Apus_apus_	0.165	-0.668528
Tachybaptu|Archilochu	0.195	-0.561661
Tachybaptu|Eudynamys_	0.177	0.165094
Tachybaptu|Fulica_atr	0.182	-0.0238944
Tachybaptu|Agelaius_p	0.211	-0.333334
Tachybaptu|Thraupis_e	0.213	-0.0528562
Tachybaptu|Cardinalis	0.219	-0.27864
Tachybaptu|Fringilla_	0.209	-0.427207
Tachybaptu|Himatione_	0.216	-0.560929
Tachybaptu|Passer_mon	0.218	-0.51432
Tachybaptu|Taeniopygi	0.206	-0.362383
Tachybaptu|Luscinia_c	0.204	-0.465429
Tachybaptu|Pseudopodo	0.214	-0.503581
Tachybaptu|Turdus_hor	0.22	-0.366392
Tachybaptu|Sturnus_se	0.212	-0.62559
Tachybaptu|Bombycilla	0.223	-0.294657
Tachybaptu|Regulus_ca	0.222	-0.140066
Tachybaptu|Henicorhin	0.218	-0.242956
Tachybaptu|Sitta_caro	0.212	-0.199184
Tachybaptu|Aegithalos	0.22	-0.548375
Tachybaptu|Phylloscop	0.212	-0.537014
Tachybaptu|Acrocephal	0.222	-0.436719
Tachybaptu|Cecropis_d	0.216	-0.454558
Tachybaptu|Alauda_arv	0.218	-0.178762
Tachybaptu|Megalurus_	0.214	-0.30722
Tachybaptu|Pycnonotus	0.21	-0.428353
Tachybaptu|Sylvia_atr	0.22	-0.501837
Tachybaptu|Remiz_cons	0.214	-0.186634
Tachybaptu|Garrulus_g	0.218	-0.513114
Tachybaptu|Lanius_tep	0.227	-0.192038
Tachybaptu|Oriolus_ch	0.221	-0.536159
Tachybaptu|Vireo_oliv	0.209	-0.380819
Tachybaptu|Tregellasi	0.217	-0.91602
Tachybaptu|Petroica_b	0.215	-0.664194
Tachybaptu|Mionectes_	0.209	-0.232197
Tachybaptu|Acanthisit	0.204	-0.0501252
Tachybaptu|Dryocopus_	0.214	-0.149475
Tachybaptu|Pterogloss	0.208	-0.411873
Tachybaptu|Aceros_cor	0.179	-1.0937
Tachybaptu|Aceros_wal	0.178	-1.17514
Tachybaptu|Bycanistes	0.174	-0.699676
Tachybaptu|Ceryle_rud	0.181	0.829155
Tachybaptu|Todiramphu	0.184	0.0969417
Tachybaptu|Eurystomus	0.186	0.084191
Tachybaptu|Amazona_ba	0.194	-1.08454
Tachybaptu|Brotogeris	0.197	-0.75091
Tachybaptu|Melopsitta	0.19	-1.02927
Tachybaptu|Agapornis_	0.211	-0.692797
Tachybaptu|Cacatua_mo	0.199	-1.12664
Tachybaptu|Bubo_bubo_	0.197	-0.485827
Tachybaptu|Caprimulgu	0.198	-1.20181
Tachybaptu|Phodilus_b	0.192	-0.980496
Tachybaptu|Falco_pere	0.19	-0.255334
Tachybaptu|Phaethon_r	0.173	-0.627108
Tachybaptu|Buteo_bute	0.168	-0.345931
Tachybaptu|Pandion_ha	0.177	-0.66871
Tachybaptu|Sagittariu	0.17	-0.066294
Tachybaptu|Columba_li	0.172	-0.433985
Tachybaptu|Anhinga_ru	0.17	-0.00978211
Tachybaptu|Phalacroco	0.163	-0.137277
Tachybaptu|Morus_serr	0.168	-0.513414
Tachybaptu|Arenaria_i	0.164	-0.451186
Tachybaptu|Jacana_jac	0.17	0.0982219
Tachybaptu|Larus_domi	0.164	-0.681042
Tachybaptu|Synthlibor	0.165	-0.398855
Tachybaptu|Haematopus	0.154	-0.543831
Tachybaptu|Vanellus_v	0.159	-0.501473
Tachybaptu|Dupetor_fl	0.17	0.206526
Tachybaptu|Botaurus_s	0.171	-0.502821
Tachybaptu|Aegotheles	0.18	-0.902808
Tachybaptu|Grus_grus_	0.156	-0.501426
Tachybaptu|Otis_tarda	0.161	-0.325951
Tachybaptu|Nipponia_n	0.156	-0.531158
Tachybaptu|Pelecanus_	0.162	-0.693176
Tachybaptu|Balaenicep	0.198	-0.55421
Phoenicopt|Pelagodrom	0.134	0.0867949
Phoenicopt|Thalassarc	0.13	0.557051
Phoenicopt|Pterodroma	0.141	0.675052
Phoenicopt|Cathartes_	0.136	0.632152
Phoenicopt|Gallus_gal	0.192	1.59759
Phoenicopt|Coturnix_j	0.197	1.59759
Phoenicopt|Colinus_vi	0.197	1.47995
Phoenicopt|Alectura_l	0.195	1.19052
Phoenicopt|Crax_rubra	0.185	1.17036
Phoenicopt|Anser_albi	0.191	1.05886
Phoenicopt|Anseranas_	0.166	0.746912
Phoenicopt|Apteryx_ha	0.19	0.878276
Phoenicopt|Casuarius_	0.188	1.57549
Phoenicopt|Apus_apus_	0.155	0.651511
Phoenicopt|Archilochu	0.187	0.758378
Phoenicopt|Eudynamys_	0.166	1.48513
Phoenicopt|Fulica_atr	0.174	1.29614
Phoenicopt|Agelaius_p	0.201	0.986706
Phoenicopt|Thraupis_e	0.203	1.26718
Phoenicopt|Cardinalis	0.211	1.0414
Phoenicopt|Fringilla_	0.2	0.892832
Phoenicopt|Himatione_	0.203	0.75911
Phoenicopt|Passer_mon	0.205	0.805719
Phoenicopt|Taeniopygi	0.192	0.957656
Phoenicopt|Luscinia_c	0.195	0.85461
Phoenicopt|Pseudopodo	0.2	0.816458
Phoenicopt|Turdus_hor	0.209	0.953647
Phoenicopt|Sturnus_se	0.201	0.694449
Phoenicopt|Bombycilla	0.214	1.02538
Phoenicopt|Regulus_ca	0.217	1.17997
Phoenicopt|Henicorhin	0.21	1.07708
Phoenicopt|Sitta_caro	0.208	1.12086
Phoenicopt|Aegithalos	0.211	0.771664
Phoenicopt|Phylloscop	0.203	0.783025
Phoenicopt|Acrocephal	0.214	0.88332
Phoenicopt|Cecropis_d	0.204	0.865481
Phoenicopt|Alauda_arv	0.208	1.14128
Phoenicopt|Megalurus_	0.207	1.01282
Phoenicopt|Pycnonotus	0.204	0.891686
Phoenicopt|Sylvia_atr	0.214	0.818202
Phoenicopt|Remiz_cons	0.203	1.13341
Phoenicopt|Garrulus_g	0.208	0.806925
Phoenicopt|Lanius_tep	0.216	1.128
Phoenicopt|Oriolus_ch	0.21	0.78388
Phoenicopt|Vireo_oliv	0.202	0.93922
Phoenicopt|Tregellasi	0.211	0.40402
Phoenicopt|Petroica_b	0.206	0.655845
Phoenicopt|Mionectes_	0.202	1.08784
Phoenicopt|Acanthisit	0.189	1.26991
Phoenicopt|Dryocopus_	0.201	1.17056
Phoenicopt|Pterogloss	0.207	0.908166
Phoenicopt|Aceros_cor	0.171	0.226341
Phoenicopt|Aceros_wal	0.168	0.144896
Phoenicopt|Bycanistes	0.165	0.620363
Phoenicopt|Ceryle_rud	0.174	2.14919
Phoenicopt|Todiramphu	0.174	1.41698
Phoenicopt|Eurystomus	0.176	1.40423
Phoenicopt|Amazona_ba	0.187	0.235502
Phoenicopt|Brotogeris	0.192	0.569129
Phoenicopt|Melopsitta	0.183	0.290772
Phoenicopt|Agapornis_	0.205	0.627242
Phoenicopt|Cacatua_mo	0.196	0.193401
Phoenicopt|Bubo_bubo_	0.193	0.834212
Phoenicopt|Caprimulgu	0.188	0.118226
Phoenicopt|Phodilus_b	0.186	0.339543
Phoenicopt|Falco_pere	0.183	1.06471
Phoenicopt|Phaethon_r	0.157	0.692932
Phoenicopt|Buteo_bute	0.153	0.974108
Phoenicopt|Pandion_ha	0.168	0.651329
Phoenicopt|Sagittariu	0.153	1.25375
Phoenicopt|Columba_li	0.158	0.886054
Phoenicopt|Anhinga_ru	0.158	1.31026
Phoenicopt|Phalacroco	0.156	1.18276
Phoenicopt|Morus_serr	0.153	0.806625
Phoenicopt|Arenaria_i	0.144	0.868853
Phoenicopt|Jacana_jac	0.159	1.41826
Phoenicopt|Larus_domi	0.144	0.638997
Phoenicopt|Synthlibor	0.149	0.921184
Phoenicopt|Haematopus	0.139	0.776208
Phoenicopt|Vanellus_v	0.142	0.818566
Phoenicopt|Dupetor_fl	0.159	1.52657
Phoenicopt|Botaurus_s	0.16	0.817218
Phoenicopt|Aegotheles	0.165	0.417231
Phoenicopt|Grus_grus_	0.134	0.818613
Phoenicopt|Otis_tarda	0.149	0.994088
Phoenicopt|Nipponia_n	0.139	0.788881
Phoenicopt|Pelecanus_	0.147	0.626864
Phoenicopt|Balaenicep	0.186	0.765829
Pelagodrom|Thalassarc	0.138	0.470257
Pelagodrom|Pterodroma	0.15	0.588257
Pelagodrom|Cathartes_	0.153	0.545357
Pelagodrom|Gallus_gal	0.21	1.5108
Pelagodrom|Coturnix_j	0.217	1.5108
Pelagodrom|Colinus_vi	0.212	1.39316
Pelagodrom|Alectura_l	0.21	1.10373
Pelagodrom|Crax_rubra	0.201	1.08356
Pelagodrom|Anser_albi	0.208	0.972061
Pelagodrom|Anseranas_	0.188	0.660117
Pelagodrom|Apteryx_ha	0.204	0.791482
Pelagodrom|Casuarius_	0.203	1.48869
Pelagodrom|Apus_apus_	0.168	0.564716
Pelagodrom|Archilochu	0.198	0.671583
Pelagodrom|Eudynamys_	0.18	1.39834
Pelagodrom|Fulica_atr	0.183	1.20935
Pelagodrom|Agelaius_p	0.214	0.899911
Pelagodrom|Thraupis_e	0.212	1.18039
Pelagodrom|Cardinalis	0.218	0.954605
Pelagodrom|Fringilla_	0.209	0.806037
Pelagodrom|Himatione_	0.217	0.672315
Pelagodrom|Passer_mon	0.214	0.718924
Pelagodrom|Taeniopygi	0.209	0.870861
Pelagodrom|Luscinia_c	0.206	0.767815
Pelagodrom|Pseudopodo	0.21	0.729663
Pelagodrom|Turdus_hor	0.22	0.866852
Pelagodrom|Sturnus_se	0.213	0.607654
Pelagodrom|Bombycilla	0.226	0.938587
Pelagodrom|Regulus_ca	0.227	1.09318
Pelagodrom|Henicorhin	0.225	0.990289
Pelagodrom|Sitta_caro	0.218	1.03406
Pelagodrom|Aegithalos	0.222	0.684869
Pelagodrom|Phylloscop	0.214	0.69623
Pelagodrom|Acrocephal	0.222	0.796526
Pelagodrom|Cecropis_d	0.214	0.778686
Pelagodrom|Alauda_arv	0.218	1.05448
Pelagodrom|Megalurus_	0.214	0.926024
Pelagodrom|Pycnonotus	0.213	0.804891
Pelagodrom|Sylvia_atr	0.223	0.731407
Pelagodrom|Remiz_cons	0.214	1.04661
Pelagodrom|Garrulus_g	0.22	0.72013
Pelagodrom|Lanius_tep	0.226	1.04121
Pelagodrom|Oriolus_ch	0.227	0.697085
Pelagodrom|Vireo_oliv	0.213	0.852425
Pelagodrom|Tregellasi	0.216	0.317225
Pelagodrom|Petroica_b	0.216	0.56905
Pelagodrom|Mionectes_	0.216	1.00105
Pelagodrom|Acanthisit	0.204	1.18312
Pelagodrom|Dryocopus_	0.213	1.08377
Pelagodrom|Pterogloss	0.212	0.821371
Pelagodrom|Aceros_cor	0.184	0.139546
Pelagodrom|Aceros_wal	0.183	0.058101
Pelagodrom|Bycanistes	0.183	0.533568
Pelagodrom|Ceryle_rud	0.186	2.0624
Pelagodrom|Todiramphu	0.185	1.33019
Pelagodrom|Eurystomus	0.192	1.31744
Pelagodrom|Amazona_ba	0.198	0.148707
Pelagodrom|Brotogeris	0.198	0.482334
Pelagodrom|Melopsitta	0.192	0.203977
Pelagodrom|Agapornis_	0.214	0.540447
Pelagodrom|Cacatua_mo	0.205	0.106606
Pelagodrom|Bubo_bubo_	0.206	0.747417
Pelagodrom|Caprimulgu	0.204	0.0314306
Pelagodrom|Phodilus_b	0.202	0.252748
Pelagodrom|Falco_pere	0.193	0.97791
Pelagodrom|Phaethon_r	0.174	0.606137
Pelagodrom|Buteo_bute	0.166	0.887313
Pelagodrom|Pandion_ha	0.18	0.564534
Pelagodrom|Sagittariu	0.173	1.16695
Pelagodrom|Columba_li	0.173	0.799259
Pelagodrom|Anhinga_ru	0.168	1.22346
Pelagodrom|Phalacroco	0.164	1.09597
Pelagodrom|Morus_serr	0.163	0.71983
Pelagodrom|Arenaria_i	0.165	0.782058
Pelagodrom|Jacana_jac	0.175	1.33147
Pelagodrom|Larus_domi	0.162	0.552202
Pelagodrom|Synthlibor	0.165	0.83439
Pelagodrom|Haematopus	0.159	0.689413
Pelagodrom|Vanellus_v	0.165	0.731771
Pelagodrom|Dupetor_fl	0.169	1.43977
Pelagodrom|Botaurus_s	0.169	0.730423
Pelagodrom|Aegotheles	0.179	0.330436
Pelagodrom|Grus_grus_	0.15	0.731818
Pelagodrom|Otis_tarda	0.159	0.907293
Pelagodrom|Nipponia_n	0.156	0.702086
Pelagodrom|Pelecanus_	0.161	0.540069
Pelagodrom|Balaenicep	0.202	0.679034
Thalassarc|Pterodroma	0.143	0.118
Thalassarc|Cathartes_	0.149	0.0751003
Thalassarc|Gallus_gal	0.206	1.04054
Thalassarc|Coturnix_j	0.21	1.04054
Thalassarc|Colinus_vi	0.215	0.922899
Thalassarc|Alectura_l	0.211	0.633473
Thalassarc|Crax_rubra	0.201	0.613307
Thalassarc|Anser_albi	0.212	0.501805
Thalassarc|Anseranas_	0.185	0.18986
Thalassarc|Apteryx_ha	0.204	0.321225
Thalassarc|Casuarius_	0.201	1.01844
Thalassarc|Apus_apus_	0.168	0.0944597
Thalassarc|Archilochu	0.204	0.201327
Thalassarc|Eudynamys_	0.179	0.928082
Thalassarc|Fulica_atr	0.191	0.739093
Thalassarc|Agelaius_p	0.217	0.429654
Thalassarc|Thraupis_e	0.216	0.710131
Thalassarc|Cardinalis	0.225	0.484348
Thalassarc|Fringilla_	0.214	0.335781
Thalassarc|Himatione_	0.217	0.202059
Thalassarc|Passer_mon	0.222	0.248668
Thalassarc|Taeniopygi	0.21	0.400604
Thalassarc|Luscinia_c	0.21	0.297559
Thalassarc|Pseudopodo	0.214	0.259407
Thalassarc|Turdus_hor	0.224	0.396595
Thalassarc|Sturnus_se	0.218	0.137397
Thalassarc|Bombycilla	0.223	0.46833
Thalassarc|Regulus_ca	0.227	0.622921
Thalassarc|Henicorhin	0.225	0.520032
Thalassarc|Sitta_caro	0.218	0.563804
Thalassarc|Aegithalos	0.222	0.214613
Thalassarc|Phylloscop	0.217	0.225974
Thalassarc|Acrocephal	0.222	0.326269
Thalassarc|Cecropis_d	0.222	0.308429
Thalassarc|Alauda_arv	0.222	0.584225
Thalassarc|Megalurus_	0.213	0.455768
Thalassarc|Pycnonotus	0.213	0.334635
Thalassarc|Sylvia_atr	0.224	0.26115
Thalassarc|Remiz_cons	0.219	0.576354
Thalassarc|Garrulus_g	0.219	0.249874
Thalassarc|Lanius_tep	0.228	0.570949
Thalassarc|Oriolus_ch	0.225	0.226828
Thalassarc|Vireo_oliv	0.214	0.382169
Thalassarc|Tregellasi	0.219	-0.153032
Thalassarc|Petroica_b	0.218	0.0987933
Thalassarc|Mionectes_	0.218	0.53079
Thalassarc|Acanthisit	0.209	0.712863
Thalassarc|Dryocopus_	0.218	0.613513
Thalassarc|Pterogloss	0.218	0.351114
Thalassarc|Aceros_cor	0.183	-0.330711
Thalassarc|Aceros_wal	0.181	-0.412156
Thalassarc|Bycanistes	0.179	0.0633114
Thalassarc|Ceryle_rud	0.188	1.59214
Thalassarc|Todiramphu	0.187	0.859929
Thalassarc|Eurystomus	0.192	0.847179
Thalassarc|Amazona_ba	0.204	-0.32155
Thalassarc|Brotogeris	0.207	0.0120777
Thalassarc|Melopsitta	0.196	-0.266279
Thalassarc|Agapornis_	0.222	0.0701902
Thalassarc|Cacatua_mo	0.208	-0.363651
Thalassarc|Bubo_bubo_	0.211	0.277161
Thalassarc|Caprimulgu	0.206	-0.438826
Thalassarc|Phodilus_b	0.201	-0.217509
Thalassarc|Falco_pere	0.197	0.507654
Thalassarc|Phaethon_r	0.174	0.13588
Thalassarc|Buteo_bute	0.171	0.417056
Thalassarc|Pandion_ha	0.182	0.0942774
Thalassarc|Sagittariu	0.169	0.696694
Thalassarc|Columba_li	0.172	0.329002
Thalassarc|Anhinga_ru	0.168	0.753206
Thalassarc|Phalacroco	0.169	0.625711
Thalassarc|Morus_serr	0.161	0.249574
Thalassarc|Arenaria_i	0.163	0.311801
Thalassarc|Jacana_jac	0.173	0.86121
Thalassarc|Larus_domi	0.162	0.0819453
Thalassarc|Synthlibor	0.161	0.364133
Thalassarc|Haematopus	0.154	0.219156
Thalassarc|Vanellus_v	0.159	0.261515
Thalassarc|Dupetor_fl	0.169	0.969514
Thalassarc|Botaurus_s	0.171	0.260167
Thalassarc|Aegotheles	0.177	-0.139821
Thalassarc|Grus_grus_	0.15	0.261561
Thalassarc|Otis_tarda	0.159	0.437037
Thalassarc|Nipponia_n	0.152	0.231829
Thalassarc|Pelecanus_	0.162	0.0698121
Thalassarc|Balaenicep	0.199	0.208778
Pterodroma|Cathartes_	0.158	-0.0428999
Pterodroma|Gallus_gal	0.21	0.922539
Pterodroma|Coturnix_j	0.217	0.922539
Pterodroma|Colinus_vi	0.213	0.804899
Pterodroma|Alectura_l	0.215	0.515473
Pterodroma|Crax_rubra	0.206	0.495307
Pterodroma|Anser_albi	0.21	0.383805
Pterodroma|Anseranas_	0.192	0.0718602
Pterodroma|Apteryx_ha	0.204	0.203225
Pterodroma|Casuarius_	0.206	0.900438
Pterodroma|Apus_apus_	0.176	-0.0235405
Pterodroma|Archilochu	0.201	0.0833266
Pterodroma|Eudynamys_	0.184	0.810082
Pterodroma|Fulica_atr	0.186	0.621093
Pterodroma|Agelaius_p	0.215	0.311654
Pterodroma|Thraupis_e	0.218	0.592131
Pterodroma|Cardinalis	0.225	0.366348
Pterodroma|Fringilla_	0.214	0.21778
Pterodroma|Himatione_	0.222	0.0840587
Pterodroma|Passer_mon	0.224	0.130668
Pterodroma|Taeniopygi	0.211	0.282604
Pterodroma|Luscinia_c	0.21	0.179559
Pterodroma|Pseudopodo	0.214	0.141407
Pterodroma|Turdus_hor	0.227	0.278595
Pterodroma|Sturnus_se	0.218	0.0193973
Pterodroma|Bombycilla	0.231	0.35033
Pterodroma|Regulus_ca	0.224	0.504921
Pterodroma|Henicorhin	0.229	0.402032
Pterodroma|Sitta_caro	0.217	0.445804
Pterodroma|Aegithalos	0.224	0.0966125
Pterodroma|Phylloscop	0.217	0.107973
Pterodroma|Acrocephal	0.228	0.208269
Pterodroma|Cecropis_d	0.225	0.190429
Pterodroma|Alauda_arv	0.225	0.466225
Pterodroma|Megalurus_	0.214	0.337767
Pterodroma|Pycnonotus	0.215	0.216634
Pterodroma|Sylvia_atr	0.227	0.14315
Pterodroma|Remiz_cons	0.222	0.458354
Pterodroma|Garrulus_g	0.22	0.131873
Pterodroma|Lanius_tep	0.228	0.452949
Pterodroma|Oriolus_ch	0.225	0.108828
Pterodroma|Vireo_oliv	0.215	0.264169
Pterodroma|Tregellasi	0.222	-0.271032
Pterodroma|Petroica_b	0.22	-0.0192068
Pterodroma|Mionectes_	0.217	0.41279
Pterodroma|Acanthisit	0.205	0.594862
Pterodroma|Dryocopus_	0.223	0.495513
Pterodroma|Pterogloss	0.225	0.233114
Pterodroma|Aceros_cor	0.195	-0.448711
Pterodroma|Aceros_wal	0.194	-0.530156
Pterodroma|Bycanistes	0.188	-0.0546888
Pterodroma|Ceryle_rud	0.19	1.47414
Pterodroma|Todiramphu	0.193	0.741929
Pterodroma|Eurystomus	0.196	0.729178
Pterodroma|Amazona_ba	0.206	-0.43955
Pterodroma|Brotogeris	0.207	-0.105922
Pterodroma|Melopsitta	0.199	-0.38428
Pterodroma|Agapornis_	0.222	-0.04781
Pterodroma|Cacatua_mo	0.208	-0.481651
Pterodroma|Bubo_bubo_	0.212	0.15916
Pterodroma|Caprimulgu	0.211	-0.556826
Pterodroma|Phodilus_b	0.211	-0.335509
Pterodroma|Falco_pere	0.205	0.389654
Pterodroma|Phaethon_r	0.181	0.01788
Pterodroma|Buteo_bute	0.181	0.299056
Pterodroma|Pandion_ha	0.189	-0.0237227
Pterodroma|Sagittariu	0.179	0.578694
Pterodroma|Columba_li	0.179	0.211002
Pterodroma|Anhinga_ru	0.178	0.635205
Pterodroma|Phalacroco	0.171	0.507711
Pterodroma|Morus_serr	0.17	0.131574
Pterodroma|Arenaria_i	0.166	0.193801
Pterodroma|Jacana_jac	0.18	0.743209
Pterodroma|Larus_domi	0.169	-0.0360549
Pterodroma|Synthlibor	0.167	0.246133
Pterodroma|Haematopus	0.165	0.101156
Pterodroma|Vanellus_v	0.167	0.143514
Pterodroma|Dupetor_fl	0.172	0.851513
Pterodroma|Botaurus_s	0.177	0.142166
Pterodroma|Aegotheles	0.181	-0.257821
Pterodroma|Grus_grus_	0.159	0.143561
Pterodroma|Otis_tarda	0.169	0.319037
Pterodroma|Nipponia_n	0.162	0.113829
Pterodroma|Pelecanus_	0.168	-0.0481881
Pterodroma|Balaenicep	0.205	0.0907775
Cathartes_|Gallus_gal	0.208	0.965439
Cathartes_|Coturnix_j	0.216	0.965439
Cathartes_|Colinus_vi	0.216	0.847799
Cathartes_|Alectura_l	0.211	0.558373
Cathartes_|Crax_rubra	0.204	0.538207
Cathartes_|Anser_albi	0.209	0.426704
Cathartes_|Anseranas_	0.189	0.11476
Cathartes_|Apteryx_ha	0.208	0.246125
Cathartes_|Casuarius_	0.206	0.943338
Cathartes_|Apus_apus_	0.173	0.0193594
Cathartes_|Archilochu	0.204	0.126226
Cathartes_|Eudynamys_	0.188	0.852981
Cathartes_|Fulica_atr	0.191	0.663993
Cathartes_|Agelaius_p	0.214	0.354554
Cathartes_|Thraupis_e	0.216	0.635031
Cathartes_|Cardinalis	0.223	0.409248
Cathartes_|Fringilla_	0.213	0.26068
Cathartes_|Himatione_	0.219	0.126959
Cathartes_|Passer_mon	0.218	0.173567
Cathartes_|Taeniopygi	0.21	0.325504
Cathartes_|Luscinia_c	0.212	0.222458
Cathartes_|Pseudopodo	0.212	0.184306
Cathartes_|Turdus_hor	0.223	0.321495
Cathartes_|Sturnus_se	0.217	0.0622972
Cathartes_|Bombycilla	0.231	0.39323
Cathartes_|Regulus_ca	0.227	0.547821
Cathartes_|Henicorhin	0.226	0.444932
Cathartes_|Sitta_caro	0.222	0.488704
Cathartes_|Aegithalos	0.224	0.139512
Cathartes_|Phylloscop	0.22	0.150873
Cathartes_|Acrocephal	0.22	0.251169
Cathartes_|Cecropis_d	0.218	0.233329
Cathartes_|Alauda_arv	0.223	0.509125
Cathartes_|Megalurus_	0.218	0.380667
Cathartes_|Pycnonotus	0.217	0.259534
Cathartes_|Sylvia_atr	0.233	0.18605
Cathartes_|Remiz_cons	0.218	0.501254
Cathartes_|Garrulus_g	0.221	0.174773
Cathartes_|Lanius_tep	0.231	0.495849
Cathartes_|Oriolus_ch	0.228	0.151728
Cathartes_|Vireo_oliv	0.218	0.307069
Cathartes_|Tregellasi	0.224	-0.228132
Cathartes_|Petroica_b	0.22	0.023693
Cathartes_|Mionectes_	0.217	0.45569
Cathartes_|Acanthisit	0.208	0.637762
Cathartes_|Dryocopus_	0.218	0.538412
Cathartes_|Pterogloss	0.218	0.276014
Cathartes_|Aceros_cor	0.189	-0.405811
Cathartes_|Aceros_wal	0.188	-0.487256
Cathartes_|Bycanistes	0.185	-0.0117889
Cathartes_|Ceryle_rud	0.189	1.51704
Cathartes_|Todiramphu	0.189	0.784829
Cathartes_|Eurystomus	0.192	0.772078
Cathartes_|Amazona_ba	0.205	-0.39665
Cathartes_|Brotogeris	0.21	-0.0630226
Cathartes_|Melopsitta	0.2	-0.34138
Cathartes_|Agapornis_	0.215	-0.00491008
Cathartes_|Cacatua_mo	0.209	-0.438751
Cathartes_|Bubo_bubo_	0.21	0.20206
Cathartes_|Caprimulgu	0.205	-0.513926
Cathartes_|Phodilus_b	0.201	-0.292609
Cathartes_|Falco_pere	0.196	0.432553
Cathartes_|Phaethon_r	0.177	0.0607799
Cathartes_|Buteo_bute	0.171	0.341956
Cathartes_|Pandion_ha	0.186	0.0191772
Cathartes_|Sagittariu	0.17	0.621593
Cathartes_|Columba_li	0.174	0.253902
Cathartes_|Anhinga_ru	0.174	0.678105
Cathartes_|Phalacroco	0.17	0.550611
Cathartes_|Morus_serr	0.168	0.174474
Cathartes_|Arenaria_i	0.167	0.236701
Cathartes_|Jacana_jac	0.178	0.786109
Cathartes_|Larus_domi	0.166	0.00684498
Cathartes_|Synthlibor	0.165	0.289033
Cathartes_|Haematopus	0.157	0.144056
Cathartes_|Vanellus_v	0.165	0.186414
Cathartes_|Dupetor_fl	0.174	0.894413
Cathartes_|Botaurus_s	0.171	0.185066
Cathartes_|Aegotheles	0.184	-0.214921
Cathartes_|Grus_grus_	0.155	0.186461
Cathartes_|Otis_tarda	0.161	0.361937
Cathartes_|Nipponia_n	0.155	0.156729
Cathartes_|Pelecanus_	0.165	-0.00528824
Cathartes_|Balaenicep	0.203	0.133677
Gallus_gal|Coturnix_j	0.138	0
Gallus_gal|Colinus_vi	0.152	-0.11764
Gallus_gal|Alectura_l	0.197	-0.407066
Gallus_gal|Crax_rubra	0.188	-0.427232
Gallus_gal|Anser_albi	0.209	-0.538734
Gallus_gal|Anseranas_	0.192	-0.850679
Gallus_gal|Apteryx_ha	0.232	-0.719314
Gallus_gal|Casuarius_	0.221	-0.0221012
Gallus_gal|Apus_apus_	0.211	-0.946079
Gallus_gal|Archilochu	0.233	-0.839212
Gallus_gal|Eudynamys_	0.218	-0.112457
Gallus_gal|Fulica_atr	0.218	-0.301446
Gallus_gal|Agelaius_p	0.239	-0.610885
Gallus_gal|Thraupis_e	0.237	-0.330408
Gallus_gal|Cardinalis	0.245	-0.556191
Gallus_gal|Fringilla_	0.233	-0.704759
Gallus_gal|Himatione_	0.244	-0.83848
Gallus_gal|Passer_mon	0.241	-0.791871
Gallus_gal|Taeniopygi	0.236	-0.639935
Gallus_gal|Luscinia_c	0.229	-0.74298
Gallus_gal|Pseudopodo	0.232	-0.781132
Gallus_gal|Turdus_hor	0.244	-0.643944
Gallus_gal|Sturnus_se	0.241	-0.903142
Gallus_gal|Bombycilla	0.247	-0.572209
Gallus_gal|Regulus_ca	0.251	-0.417618
Gallus_gal|Henicorhin	0.246	-0.520507
Gallus_gal|Sitta_caro	0.24	-0.476735
Gallus_gal|Aegithalos	0.247	-0.825926
Gallus_gal|Phylloscop	0.236	-0.814566
Gallus_gal|Acrocephal	0.247	-0.71427
Gallus_gal|Cecropis_d	0.241	-0.73211
Gallus_gal|Alauda_arv	0.239	-0.456314
Gallus_gal|Megalurus_	0.235	-0.584771
Gallus_gal|Pycnonotus	0.237	-0.705905
Gallus_gal|Sylvia_atr	0.25	-0.779389
Gallus_gal|Remiz_cons	0.236	-0.464185
Gallus_gal|Garrulus_g	0.246	-0.790666
Gallus_gal|Lanius_tep	0.253	-0.46959
Gallus_gal|Oriolus_ch	0.254	-0.813711
Gallus_gal|Vireo_oliv	0.242	-0.65837
Gallus_gal|Tregellasi	0.245	-1.19357
Gallus_gal|Petroica_b	0.242	-0.941746
Gallus_gal|Mionectes_	0.238	-0.509749
Gallus_gal|Acanthisit	0.239	-0.327677
Gallus_gal|Dryocopus_	0.234	-0.427026
Gallus_gal|Pterogloss	0.241	-0.689425
Gallus_gal|Aceros_cor	0.222	-1.37125
Gallus_gal|Aceros_wal	0.223	-1.45269
Gallus_gal|Bycanistes	0.218	-0.977228
Gallus_gal|Ceryle_rud	0.221	0.551604
Gallus_gal|Todiramphu	0.222	-0.18061
Gallus_gal|Eurystomus	0.225	-0.19336
Gallus_gal|Amazona_ba	0.236	-1.36209
Gallus_gal|Brotogeris	0.236	-1.02846
Gallus_gal|Melopsitta	0.228	-1.30682
Gallus_gal|Agapornis_	0.246	-0.970349
Gallus_gal|Cacatua_mo	0.239	-1.40419
Gallus_gal|Bubo_bubo_	0.239	-0.763379
Gallus_gal|Caprimulgu	0.235	-1.47937
Gallus_gal|Phodilus_b	0.231	-1.25805
Gallus_gal|Falco_pere	0.227	-0.532885
Gallus_gal|Phaethon_r	0.221	-0.904659
Gallus_gal|Buteo_bute	0.215	-0.623483
Gallus_gal|Pandion_ha	0.228	-0.946262
Gallus_gal|Sagittariu	0.217	-0.343845
Gallus_gal|Columba_li	0.214	-0.711537
Gallus_gal|Anhinga_ru	0.212	-0.287334
Gallus_gal|Phalacroco	0.213	-0.414828
Gallus_gal|Morus_serr	0.214	-0.790965
Gallus_gal|Arenaria_i	0.214	-0.728738
Gallus_gal|Jacana_jac	0.216	-0.17933
Gallus_gal|Larus_domi	0.21	-0.958594
Gallus_gal|Synthlibor	0.209	-0.676406
Gallus_gal|Haematopus	0.208	-0.821383
Gallus_gal|Vanellus_v	0.207	-0.779024
Gallus_gal|Dupetor_fl	0.218	-0.0710255
Gallus_gal|Botaurus_s	0.217	-0.780373
Gallus_gal|Aegotheles	0.224	-1.18036
Gallus_gal|Grus_grus_	0.209	-0.778978
Gallus_gal|Otis_tarda	0.211	-0.603502
Gallus_gal|Nipponia_n	0.211	-0.80871
Gallus_gal|Pelecanus_	0.212	-0.970727
Gallus_gal|Balaenicep	0.258	-0.831761
Coturnix_j|Colinus_vi	0.164	-0.11764
Coturnix_j|Alectura_l	0.207	-0.407066
Coturnix_j|Crax_rubra	0.195	-0.427232
Coturnix_j|Anser_albi	0.211	-0.538734
Coturnix_j|Anseranas_	0.199	-0.850679
Coturnix_j|Apteryx_ha	0.233	-0.719314
Coturnix_j|Casuarius_	0.226	-0.0221012
Coturnix_j|Apus_apus_	0.217	-0.946079
Coturnix_j|Archilochu	0.236	-0.839212
Coturnix_j|Eudynamys_	0.222	-0.112457
Coturnix_j|Fulica_atr	0.224	-0.301446
Coturnix_j|Agelaius_p	0.241	-0.610885
Coturnix_j|Thraupis_e	0.246	-0.330408
Coturnix_j|Cardinalis	0.252	-0.556191
Coturnix_j|Fringilla_	0.243	-0.704759
Coturnix_j|Himatione_	0.249	-0.83848
Coturnix_j|Passer_mon	0.245	-0.791871
Coturnix_j|Taeniopygi	0.237	-0.639935
Coturnix_j|Luscinia_c	0.236	-0.74298
Coturnix_j|Pseudopodo	0.237	-0.781132
Coturnix_j|Turdus_hor	0.25	-0.643944
Coturnix_j|Sturnus_se	0.241	-0.903142
Coturnix_j|Bombycilla	0.25	-0.572209
Coturnix_j|Regulus_ca	0.251	-0.417618
Coturnix_j|Henicorhin	0.251	-0.520507
Coturnix_j|Sitta_caro	0.243	-0.476735
Coturnix_j|Aegithalos	0.252	-0.825926
Coturnix_j|Phylloscop	0.248	-0.814566
Coturnix_j|Acrocephal	0.249	-0.71427
Coturnix_j|Cecropis_d	0.246	-0.73211
Coturnix_j|Alauda_arv	0.249	-0.456314
Coturnix_j|Megalurus_	0.24	-0.584771
Coturnix_j|Pycnonotus	0.243	-0.705905
Coturnix_j|Sylvia_atr	0.256	-0.779389
Coturnix_j|Remiz_cons	0.246	-0.464185
Coturnix_j|Garrulus_g	0.248	-0.790666
Coturnix_j|Lanius_tep	0.257	-0.46959
Coturnix_j|Oriolus_ch	0.253	-0.813711
Coturnix_j|Vireo_oliv	0.241	-0.65837
Coturnix_j|Tregellasi	0.249	-1.19357
Coturnix_j|Petroica_b	0.252	-0.941746
Coturnix_j|Mionectes_	0.243	-0.509749
Coturnix_j|Acanthisit	0.249	-0.327677
Coturnix_j|Dryocopus_	0.245	-0.427026
Coturnix_j|Pterogloss	0.247	-0.689425
Coturnix_j|Aceros_cor	0.232	-1.37125
Coturnix_j|Aceros_wal	0.229	-1.45269
Coturnix_j|Bycanistes	0.223	-0.977228
Coturnix_j|Ceryle_rud	0.224	0.551604
Coturnix_j|Todiramphu	0.225	-0.18061
Coturnix_j|Eurystomus	0.227	-0.19336
Coturnix_j|Amazona_ba	0.237	-1.36209
Coturnix_j|Brotogeris	0.24	-1.02846
Coturnix_j|Melopsitta	0.23	-1.30682
Coturnix_j|Agapornis_	0.251	-0.970349
Coturnix_j|Cacatua_mo	0.248	-1.40419
Coturnix_j|Bubo_bubo_	0.245	-0.763379
Coturnix_j|Caprimulgu	0.239	-1.47937
Coturnix_j|Phodilus_b	0.236	-1.25805
Coturnix_j|Falco_pere	0.238	-0.532885
Coturnix_j|Phaethon_r	0.232	-0.904659
Coturnix_j|Buteo_bute	0.224	-0.623483
Coturnix_j|Pandion_ha	0.228	-0.946262
Coturnix_j|Sagittariu	0.222	-0.343845
Coturnix_j|Columba_li	0.223	-0.711537
Coturnix_j|Anhinga_ru	0.218	-0.287334
Coturnix_j|Phalacroco	0.215	-0.414828
Coturnix_j|Morus_serr	0.217	-0.790965
Coturnix_j|Arenaria_i	0.215	-0.728738
Coturnix_j|Jacana_jac	0.225	-0.17933
Coturnix_j|Larus_domi	0.217	-0.958594
Coturnix_j|Synthlibor	0.216	-0.676406
Coturnix_j|Haematopus	0.214	-0.821383
Coturnix_j|Vanellus_v	0.214	-0.779024
Coturnix_j|Dupetor_fl	0.225	-0.0710255
Coturnix_j|Botaurus_s	0.22	-0.780373
Coturnix_j|Aegotheles	0.231	-1.18036
Coturnix_j|Grus_grus_	0.212	-0.778978
Coturnix_j|Otis_tarda	0.213	-0.603502
Coturnix_j|Nipponia_n	0.214	-0.80871
Coturnix_j|Pelecanus_	0.224	-0.970727
Coturnix_j|Balaenicep	0.263	-0.831761
Colinus_vi|Alectura_l	0.201	-0.289426
Colinus_vi|Crax_rubra	0.195	-0.309592
Colinus_vi|Anser_albi	0.216	-0.421094
Colinus_vi|Anseranas_	0.199	-0.733039
Colinus_vi|Apteryx_ha	0.234	-0.601674
Colinus_vi|Casuarius_	0.229	0.0955387
Colinus_vi|Apus_apus_	0.216	-0.82844
Colinus_vi|Archilochu	0.235	-0.721572
Colinus_vi|Eudynamys_	0.223	0.00518258
Colinus_vi|Fulica_atr	0.22	-0.183806
Colinus_vi|Agelaius_p	0.239	-0.493245
Colinus_vi|Thraupis_e	0.241	-0.212768
Colinus_vi|Cardinalis	0.248	-0.438551
Colinus_vi|Fringilla_	0.237	-0.587119
Colinus_vi|Himatione_	0.246	-0.72084
Colinus_vi|Passer_mon	0.246	-0.674231
Colinus_vi|Taeniopygi	0.241	-0.522295
Colinus_vi|Luscinia_c	0.237	-0.625341
Colinus_vi|Pseudopodo	0.239	-0.663493
Colinus_vi|Turdus_hor	0.248	-0.526304
Colinus_vi|Sturnus_se	0.244	-0.785502
Colinus_vi|Bombycilla	0.25	-0.454569
Colinus_vi|Regulus_ca	0.254	-0.299978
Colinus_vi|Henicorhin	0.246	-0.402867
Colinus_vi|Sitta_caro	0.245	-0.359095
Colinus_vi|Aegithalos	0.252	-0.708286
Colinus_vi|Phylloscop	0.243	-0.696926
Colinus_vi|Acrocephal	0.25	-0.59663
Colinus_vi|Cecropis_d	0.241	-0.61447
Colinus_vi|Alauda_arv	0.246	-0.338674
Colinus_vi|Megalurus_	0.238	-0.467132
Colinus_vi|Pycnonotus	0.245	-0.588265
Colinus_vi|Sylvia_atr	0.253	-0.661749
Colinus_vi|Remiz_cons	0.242	-0.346545
Colinus_vi|Garrulus_g	0.252	-0.673026
Colinus_vi|Lanius_tep	0.26	-0.35195
Colinus_vi|Oriolus_ch	0.253	-0.696071
Colinus_vi|Vireo_oliv	0.245	-0.54073
Colinus_vi|Tregellasi	0.255	-1.07593
Colinus_vi|Petroica_b	0.25	-0.824106
Colinus_vi|Mionectes_	0.247	-0.392109
Colinus_vi|Acanthisit	0.243	-0.210037
Colinus_vi|Dryocopus_	0.245	-0.309387
Colinus_vi|Pterogloss	0.243	-0.571785
Colinus_vi|Aceros_cor	0.226	-1.25361
Colinus_vi|Aceros_wal	0.225	-1.33505
Colinus_vi|Bycanistes	0.223	-0.859588
Colinus_vi|Ceryle_rud	0.223	0.669244
Colinus_vi|Todiramphu	0.225	-0.0629698
Colinus_vi|Eurystomus	0.228	-0.0757205
Colinus_vi|Amazona_ba	0.231	-1.24445
Colinus_vi|Brotogeris	0.239	-0.910821
Colinus_vi|Melopsitta	0.23	-1.18918
Colinus_vi|Agapornis_	0.244	-0.852709
Colinus_vi|Cacatua_mo	0.247	-1.28655
Colinus_vi|Bubo_bubo_	0.243	-0.645739
Colinus_vi|Caprimulgu	0.237	-1.36173
Colinus_vi|Phodilus_b	0.236	-1.14041
Colinus_vi|Falco_pere	0.229	-0.415245
Colinus_vi|Phaethon_r	0.225	-0.787019
Colinus_vi|Buteo_bute	0.223	-0.505843
Colinus_vi|Pandion_ha	0.235	-0.828622
Colinus_vi|Sagittariu	0.22	-0.226206
Colinus_vi|Columba_li	0.22	-0.593897
Colinus_vi|Anhinga_ru	0.218	-0.169694
Colinus_vi|Phalacroco	0.216	-0.297188
Colinus_vi|Morus_serr	0.219	-0.673325
Colinus_vi|Arenaria_i	0.213	-0.611098
Colinus_vi|Jacana_jac	0.218	-0.0616896
Colinus_vi|Larus_domi	0.218	-0.840954
Colinus_vi|Synthlibor	0.213	-0.558766
Colinus_vi|Haematopus	0.214	-0.703743
Colinus_vi|Vanellus_v	0.21	-0.661385
Colinus_vi|Dupetor_fl	0.223	0.0466144
Colinus_vi|Botaurus_s	0.22	-0.662733
Colinus_vi|Aegotheles	0.226	-1.06272
Colinus_vi|Grus_grus_	0.21	-0.661338
Colinus_vi|Otis_tarda	0.214	-0.485862
Colinus_vi|Nipponia_n	0.212	-0.69107
Colinus_vi|Pelecanus_	0.22	-0.853087
Colinus_vi|Balaenicep	0.264	-0.714122
Alectura_l|Crax_rubra	0.185	-0.0201659
Alectura_l|Anser_albi	0.206	-0.131668
Alectura_l|Anseranas_	0.187	-0.443613
Alectura_l|Apteryx_ha	0.23	-0.312248
Alectura_l|Casuarius_	0.223	0.384965
Alectura_l|Apus_apus_	0.214	-0.539013
Alectura_l|Archilochu	0.239	-0.432146
Alectura_l|Eudynamys_	0.224	0.294609
Alectura_l|Fulica_atr	0.226	0.10562
Alectura_l|Agelaius_p	0.24	-0.203819
Alectura_l|Thraupis_e	0.239	0.0766583
Alectura_l|Cardinalis	0.243	-0.149125
Alectura_l|Fringilla_	0.243	-0.297693
Alectura_l|Himatione_	0.247	-0.431414
Alectura_l|Passer_mon	0.243	-0.384805
Alectura_l|Taeniopygi	0.236	-0.232869
Alectura_l|Luscinia_c	0.233	-0.335914
Alectura_l|Pseudopodo	0.24	-0.374066
Alectura_l|Turdus_hor	0.244	-0.236878
Alectura_l|Sturnus_se	0.24	-0.496076
Alectura_l|Bombycilla	0.259	-0.165143
Alectura_l|Regulus_ca	0.253	-0.0105518
Alectura_l|Henicorhin	0.241	-0.113441
Alectura_l|Sitta_caro	0.246	-0.069669
Alectura_l|Aegithalos	0.252	-0.41886
Alectura_l|Phylloscop	0.242	-0.4075
Alectura_l|Acrocephal	0.245	-0.307204
Alectura_l|Cecropis_d	0.244	-0.325044
Alectura_l|Alauda_arv	0.245	-0.0492478
Alectura_l|Megalurus_	0.248	-0.177705
Alectura_l|Pycnonotus	0.244	-0.298839
Alectura_l|Sylvia_atr	0.261	-0.372323
Alectura_l|Remiz_cons	0.24	-0.0571192
Alectura_l|Garrulus_g	0.247	-0.3836
Alectura_l|Lanius_tep	0.26	-0.0625236
Alectura_l|Oriolus_ch	0.256	-0.406645
Alectura_l|Vireo_oliv	0.246	-0.251304
Alectura_l|Tregellasi	0.246	-0.786505
Alectura_l|Petroica_b	0.239	-0.53468
Alectura_l|Mionectes_	0.247	-0.102683
Alectura_l|Acanthisit	0.24	0.0793894
Alectura_l|Dryocopus_	0.237	-0.0199604
Alectura_l|Pterogloss	0.237	-0.282359
Alectura_l|Aceros_cor	0.223	-0.964184
Alectura_l|Aceros_wal	0.223	-1.04563
Alectura_l|Bycanistes	0.22	-0.570162
Alectura_l|Ceryle_rud	0.221	0.95867
Alectura_l|Todiramphu	0.225	0.226456
Alectura_l|Eurystomus	0.233	0.213706
Alectura_l|Amazona_ba	0.239	-0.955023
Alectura_l|Brotogeris	0.242	-0.621395
Alectura_l|Melopsitta	0.237	-0.899752
Alectura_l|Agapornis_	0.247	-0.563283
Alectura_l|Cacatua_mo	0.247	-0.997124
Alectura_l|Bubo_bubo_	0.248	-0.356312
Alectura_l|Caprimulgu	0.238	-1.0723
Alectura_l|Phodilus_b	0.235	-0.850982
Alectura_l|Falco_pere	0.24	-0.125819
Alectura_l|Phaethon_r	0.221	-0.497593
Alectura_l|Buteo_bute	0.218	-0.216417
Alectura_l|Pandion_ha	0.226	-0.539196
Alectura_l|Sagittariu	0.218	0.0632206
Alectura_l|Columba_li	0.217	-0.304471
Alectura_l|Anhinga_ru	0.217	0.119732
Alectura_l|Phalacroco	0.215	-0.00776205
Alectura_l|Morus_serr	0.219	-0.383899
Alectura_l|Arenaria_i	0.211	-0.321672
Alectura_l|Jacana_jac	0.218	0.227736
Alectura_l|Larus_domi	0.212	-0.551528
Alectura_l|Synthlibor	0.212	-0.26934
Alectura_l|Haematopus	0.212	-0.414317
Alectura_l|Vanellus_v	0.212	-0.371958
Alectura_l|Dupetor_fl	0.219	0.33604
Alectura_l|Botaurus_s	0.221	-0.373307
Alectura_l|Aegotheles	0.225	-0.773294
Alectura_l|Grus_grus_	0.212	-0.371912
Alectura_l|Otis_tarda	0.213	-0.196436
Alectura_l|Nipponia_n	0.207	-0.401644
Alectura_l|Pelecanus_	0.214	-0.563661
Alectura_l|Balaenicep	0.259	-0.424695
Crax_rubra|Anser_albi	0.206	-0.111502
Crax_rubra|Anseranas_	0.18	-0.423447
Crax_rubra|Apteryx_ha	0.227	-0.292082
Crax_rubra|Casuarius_	0.228	0.405131
Crax_rubra|Apus_apus_	0.211	-0.518847
Crax_rubra|Archilochu	0.229	-0.41198
Crax_rubra|Eudynamys_	0.218	0.314775
Crax_rubra|Fulica_atr	0.219	0.125786
Crax_rubra|Agelaius_p	0.235	-0.183653
Crax_rubra|Thraupis_e	0.235	0.0968243
Crax_rubra|Cardinalis	0.245	-0.128959
Crax_rubra|Fringilla_	0.236	-0.277527
Crax_rubra|Himatione_	0.242	-0.411248
Crax_rubra|Passer_mon	0.241	-0.364639
Crax_rubra|Taeniopygi	0.234	-0.212703
Crax_rubra|Luscinia_c	0.228	-0.315748
Crax_rubra|Pseudopodo	0.232	-0.3539
Crax_rubra|Turdus_hor	0.238	-0.216712
Crax_rubra|Sturnus_se	0.234	-0.47591
Crax_rubra|Bombycilla	0.25	-0.144977
Crax_rubra|Regulus_ca	0.25	0.00961415
Crax_rubra|Henicorhin	0.246	-0.093275
Crax_rubra|Sitta_caro	0.239	-0.0495031
Crax_rubra|Aegithalos	0.243	-0.398694
Crax_rubra|Phylloscop	0.241	-0.387334
Crax_rubra|Acrocephal	0.239	-0.287038
Crax_rubra|Cecropis_d	0.243	-0.304878
Crax_rubra|Alauda_arv	0.236	-0.0290818
Crax_rubra|Megalurus_	0.236	-0.157539
Crax_rubra|Pycnonotus	0.239	-0.278673
Crax_rubra|Sylvia_atr	0.25	-0.352157
Crax_rubra|Remiz_cons	0.233	-0.0369533
Crax_rubra|Garrulus_g	0.242	-0.363434
Crax_rubra|Lanius_tep	0.251	-0.0423577
Crax_rubra|Oriolus_ch	0.246	-0.386479
Crax_rubra|Vireo_oliv	0.236	-0.231138
Crax_rubra|Tregellasi	0.24	-0.766339
Crax_rubra|Petroica_b	0.239	-0.514514
Crax_rubra|Mionectes_	0.243	-0.0825169
Crax_rubra|Acanthisit	0.235	0.0995553
Crax_rubra|Dryocopus_	0.235	0.000205529
Crax_rubra|Pterogloss	0.234	-0.262193
Crax_rubra|Aceros_cor	0.217	-0.944018
Crax_rubra|Aceros_wal	0.215	-1.02546
Crax_rubra|Bycanistes	0.211	-0.549996
Crax_rubra|Ceryle_rud	0.218	0.978836
Crax_rubra|Todiramphu	0.218	0.246622
Crax_rubra|Eurystomus	0.218	0.233871
Crax_rubra|Amazona_ba	0.229	-0.934857
Crax_rubra|Brotogeris	0.231	-0.601229
Crax_rubra|Melopsitta	0.226	-0.879586
Crax_rubra|Agapornis_	0.244	-0.543117
Crax_rubra|Cacatua_mo	0.237	-0.976958
Crax_rubra|Bubo_bubo_	0.232	-0.336147
Crax_rubra|Caprimulgu	0.231	-1.05213
Crax_rubra|Phodilus_b	0.23	-0.830816
Crax_rubra|Falco_pere	0.232	-0.105653
Crax_rubra|Phaethon_r	0.215	-0.477427
Crax_rubra|Buteo_bute	0.214	-0.196251
Crax_rubra|Pandion_ha	0.227	-0.51903
Crax_rubra|Sagittariu	0.21	0.0833865
Crax_rubra|Columba_li	0.213	-0.284305
Crax_rubra|Anhinga_ru	0.21	0.139898
Crax_rubra|Phalacroco	0.208	0.0124039
Crax_rubra|Morus_serr	0.215	-0.363733
Crax_rubra|Arenaria_i	0.207	-0.301506
Crax_rubra|Jacana_jac	0.211	0.247902
Crax_rubra|Larus_domi	0.204	-0.531362
Crax_rubra|Synthlibor	0.204	-0.249174
Crax_rubra|Haematopus	0.201	-0.394151
Crax_rubra|Vanellus_v	0.201	-0.351792
Crax_rubra|Dupetor_fl	0.215	0.356206
Crax_rubra|Botaurus_s	0.215	-0.353141
Crax_rubra|Aegotheles	0.219	-0.753128
Crax_rubra|Grus_grus_	0.2	-0.351746
Crax_rubra|Otis_tarda	0.21	-0.17627
Crax_rubra|Nipponia_n	0.203	-0.381478
Crax_rubra|Pelecanus_	0.209	-0.543495
Crax_rubra|Balaenicep	0.248	-0.404529
Anser_albi|Anseranas_	0.178	-0.311944
Anser_albi|Apteryx_ha	0.227	-0.18058
Anser_albi|Casuarius_	0.231	0.516633
Anser_albi|Apus_apus_	0.214	-0.407345
Anser_albi|Archilochu	0.222	-0.300478
Anser_albi|Eudynamys_	0.219	0.426277
Anser_albi|Fulica_atr	0.219	0.237289
Anser_albi|Agelaius_p	0.234	-0.0721506
Anser_albi|Thraupis_e	0.233	0.208327
Anser_albi|Cardinalis	0.239	-0.0174567
Anser_albi|Fringilla_	0.231	-0.166024
Anser_albi|Himatione_	0.237	-0.299746
Anser_albi|Passer_mon	0.236	-0.253137
Anser_albi|Taeniopygi	0.23	-0.101201
Anser_albi|Luscinia_c	0.227	-0.204246
Anser_albi|Pseudopodo	0.229	-0.242398
Anser_albi|Turdus_hor	0.238	-0.105209
Anser_albi|Sturnus_se	0.224	-0.364407
Anser_albi|Bombycilla	0.244	-0.0334743
Anser_albi|Regulus_ca	0.239	0.121117
Anser_albi|Henicorhin	0.243	0.0182274
Anser_albi|Sitta_caro	0.233	0.0619994
Anser_albi|Aegithalos	0.24	-0.287192
Anser_albi|Phylloscop	0.236	-0.275831
Anser_albi|Acrocephal	0.238	-0.175536
Anser_albi|Cecropis_d	0.232	-0.193376
Anser_albi|Alauda_arv	0.235	0.0824206
Anser_albi|Megalurus_	0.234	-0.0460371
Anser_albi|Pycnonotus	0.235	-0.16717
Anser_albi|Sylvia_atr	0.248	-0.240655
Anser_albi|Remiz_cons	0.236	0.0745492
Anser_albi|Garrulus_g	0.24	-0.251931
Anser_albi|Lanius_tep	0.243	0.0691447
Anser_albi|Oriolus_ch	0.238	-0.274977
Anser_albi|Vireo_oliv	0.226	-0.119636
Anser_albi|Tregellasi	0.236	-0.654837
Anser_albi|Petroica_b	0.241	-0.403011
Anser_albi|Mionectes_	0.244	0.0289855
Anser_albi|Acanthisit	0.235	0.211058
Anser_albi|Dryocopus_	0.244	0.111708
Anser_albi|Pterogloss	0.24	-0.15069
Anser_albi|Aceros_cor	0.224	-0.832516
Anser_albi|Aceros_wal	0.222	-0.91396
Anser_albi|Bycanistes	0.216	-0.438493
Anser_albi|Ceryle_rud	0.224	1.09034
Anser_albi|Todiramphu	0.224	0.358125
Anser_albi|Eurystomus	0.225	0.345374
Anser_albi|Amazona_ba	0.24	-0.823355
Anser_albi|Brotogeris	0.239	-0.489727
Anser_albi|Melopsitta	0.232	-0.768084
Anser_albi|Agapornis_	0.242	-0.431615
Anser_albi|Cacatua_mo	0.246	-0.865455
Anser_albi|Bubo_bubo_	0.24	-0.224644
Anser_albi|Caprimulgu	0.238	-0.940631
Anser_albi|Phodilus_b	0.232	-0.719313
Anser_albi|Falco_pere	0.233	0.00584898
Anser_albi|Phaethon_r	0.212	-0.365925
Anser_albi|Buteo_bute	0.217	-0.0847484
Anser_albi|Pandion_ha	0.226	-0.407527
Anser_albi|Sagittariu	0.216	0.194889
Anser_albi|Columba_li	0.22	-0.172802
Anser_albi|Anhinga_ru	0.217	0.251401
Anser_albi|Phalacroco	0.215	0.123906
Anser_albi|Morus_serr	0.216	-0.252231
Anser_albi|Arenaria_i	0.213	-0.190003
Anser_albi|Jacana_jac	0.216	0.359405
Anser_albi|Larus_domi	0.212	-0.419859
Anser_albi|Synthlibor	0.207	-0.137672
Anser_albi|Haematopus	0.209	-0.282648
Anser_albi|Vanellus_v	0.209	-0.24029
Anser_albi|Dupetor_fl	0.218	0.467709
Anser_albi|Botaurus_s	0.215	-0.241638
Anser_albi|Aegotheles	0.225	-0.641625
Anser_albi|Grus_grus_	0.205	-0.240243
Anser_albi|Otis_tarda	0.21	-0.0647679
Anser_albi|Nipponia_n	0.206	-0.269975
Anser_albi|Pelecanus_	0.21	-0.431993
Anser_albi|Balaenicep	0.254	-0.293027
Anseranas_|Apteryx_ha	0.21	0.131365
Anseranas_|Casuarius_	0.21	0.828578
Anseranas_|Apus_apus_	0.197	-0.0954007
Anseranas_|Archilochu	0.22	0.0114664
Anseranas_|Eudynamys_	0.205	0.738221
Anseranas_|Fulica_atr	0.21	0.549233
Anseranas_|Agelaius_p	0.225	0.239794
Anseranas_|Thraupis_e	0.226	0.520271
Anseranas_|Cardinalis	0.234	0.294488
Anseranas_|Fringilla_	0.226	0.14592
Anseranas_|Himatione_	0.23	0.0121985
Anseranas_|Passer_mon	0.23	0.0588074
Anseranas_|Taeniopygi	0.222	0.210744
Anseranas_|Luscinia_c	0.221	0.107698
Anseranas_|Pseudopodo	0.223	0.0695463
Anseranas_|Turdus_hor	0.235	0.206735
Anseranas_|Sturnus_se	0.227	-0.0524629
Anseranas_|Bombycilla	0.237	0.27847
Anseranas_|Regulus_ca	0.234	0.433061
Anseranas_|Henicorhin	0.233	0.330172
Anseranas_|Sitta_caro	0.232	0.373944
Anseranas_|Aegithalos	0.233	0.0247524
Anseranas_|Phylloscop	0.23	0.0361132
Anseranas_|Acrocephal	0.234	0.136409
Anseranas_|Cecropis_d	0.232	0.118569
Anseranas_|Alauda_arv	0.234	0.394365
Anseranas_|Megalurus_	0.227	0.265907
Anseranas_|Pycnonotus	0.227	0.144774
Anseranas_|Sylvia_atr	0.244	0.0712899
Anseranas_|Remiz_cons	0.228	0.386494
Anseranas_|Garrulus_g	0.231	0.0600131
Anseranas_|Lanius_tep	0.24	0.381089
Anseranas_|Oriolus_ch	0.24	0.0369679
Anseranas_|Vireo_oliv	0.226	0.192308
Anseranas_|Tregellasi	0.235	-0.342892
Anseranas_|Petroica_b	0.23	-0.091067
Anseranas_|Mionectes_	0.225	0.34093
Anseranas_|Acanthisit	0.223	0.523002
Anseranas_|Dryocopus_	0.23	0.423652
Anseranas_|Pterogloss	0.23	0.161254
Anseranas_|Aceros_cor	0.21	-0.520571
Anseranas_|Aceros_wal	0.21	-0.602016
Anseranas_|Bycanistes	0.205	-0.126549
Anseranas_|Ceryle_rud	0.203	1.40228
Anseranas_|Todiramphu	0.208	0.670069
Anseranas_|Eurystomus	0.208	0.657318
Anseranas_|Amazona_ba	0.223	-0.51141
Anseranas_|Brotogeris	0.226	-0.177783
Anseranas_|Melopsitta	0.216	-0.45614
Anseranas_|Agapornis_	0.233	-0.11967
Anseranas_|Cacatua_mo	0.231	-0.553511
Anseranas_|Bubo_bubo_	0.225	0.0873002
Anseranas_|Caprimulgu	0.222	-0.628686
Anseranas_|Phodilus_b	0.218	-0.407369
Anseranas_|Falco_pere	0.221	0.317793
Anseranas_|Phaethon_r	0.2	-0.0539802
Anseranas_|Buteo_bute	0.2	0.227196
Anseranas_|Pandion_ha	0.203	-0.0955829
Anseranas_|Sagittariu	0.198	0.506833
Anseranas_|Columba_li	0.201	0.139142
Anseranas_|Anhinga_ru	0.197	0.563345
Anseranas_|Phalacroco	0.197	0.435851
Anseranas_|Morus_serr	0.196	0.0597135
Anseranas_|Arenaria_i	0.191	0.121941
Anseranas_|Jacana_jac	0.197	0.671349
Anseranas_|Larus_domi	0.19	-0.107915
Anseranas_|Synthlibor	0.191	0.174273
Anseranas_|Haematopus	0.192	0.0292959
Anseranas_|Vanellus_v	0.187	0.0716543
Anseranas_|Dupetor_fl	0.2	0.779653
Anseranas_|Botaurus_s	0.201	0.0703062
Anseranas_|Aegotheles	0.214	-0.329681
Anseranas_|Grus_grus_	0.186	0.0717009
Anseranas_|Otis_tarda	0.194	0.247176
Anseranas_|Nipponia_n	0.19	0.041969
Anseranas_|Pelecanus_	0.193	-0.120048
Anseranas_|Balaenicep	0.236	0.0189173
Apteryx_ha|Casuarius_	0.152	0.697213
Apteryx_ha|Apus_apus_	0.21	-0.226765
Apteryx_ha|Archilochu	0.234	-0.119898
Apteryx_ha|Eudynamys_	0.219	0.606857
Apteryx_ha|Fulica_atr	0.226	0.417868
Apteryx_ha|Agelaius_p	0.245	0.108429
Apteryx_ha|Thraupis_e	0.243	0.388906
Apteryx_ha|Cardinalis	0.251	0.163123
Apteryx_ha|Fringilla_	0.242	0.0145555
Apteryx_ha|Himatione_	0.246	-0.119166
Apteryx_ha|Passer_mon	0.25	-0.0725572
Apteryx_ha|Taeniopygi	0.237	0.0793792
Apteryx_ha|Luscinia_c	0.238	-0.0236663
Apteryx_ha|Pseudopodo	0.241	-0.0618183
Apteryx_ha|Turdus_hor	0.248	0.0753704
Apteryx_ha|Sturnus_se	0.242	-0.183828
Apteryx_ha|Bombycilla	0.249	0.147105
Apteryx_ha|Regulus_ca	0.252	0.301696
Apteryx_ha|Henicorhin	0.25	0.198807
Apteryx_ha|Sitta_caro	0.246	0.242579
Apteryx_ha|Aegithalos	0.245	-0.106612
Apteryx_ha|Phylloscop	0.245	-0.0952514
Apteryx_ha|Acrocephal	0.251	0.00504398
Apteryx_ha|Cecropis_d	0.247	-0.0127958
Apteryx_ha|Alauda_arv	0.252	0.263
Apteryx_ha|Megalurus_	0.246	0.134543
Apteryx_ha|Pycnonotus	0.24	0.0134095
Apteryx_ha|Sylvia_atr	0.254	-0.0600748
Apteryx_ha|Remiz_cons	0.251	0.255129
Apteryx_ha|Garrulus_g	0.247	-0.0713515
Apteryx_ha|Lanius_tep	0.256	0.249724
Apteryx_ha|Oriolus_ch	0.252	-0.0943968
Apteryx_ha|Vireo_oliv	0.241	0.0609438
Apteryx_ha|Tregellasi	0.249	-0.474257
Apteryx_ha|Petroica_b	0.243	-0.222432
Apteryx_ha|Mionectes_	0.247	0.209565
Apteryx_ha|Acanthisit	0.241	0.391638
Apteryx_ha|Dryocopus_	0.246	0.292288
Apteryx_ha|Pterogloss	0.246	0.0298893
Apteryx_ha|Aceros_cor	0.23	-0.651936
Apteryx_ha|Aceros_wal	0.228	-0.733381
Apteryx_ha|Bycanistes	0.223	-0.257914
Apteryx_ha|Ceryle_rud	0.226	1.27092
Apteryx_ha|Todiramphu	0.222	0.538704
Apteryx_ha|Eurystomus	0.233	0.525954
Apteryx_ha|Amazona_ba	0.245	-0.642775
Apteryx_ha|Brotogeris	0.244	-0.309147
Apteryx_ha|Melopsitta	0.233	-0.587504
Apteryx_ha|Agapornis_	0.257	-0.251035
Apteryx_ha|Cacatua_mo	0.25	-0.684876
Apteryx_ha|Bubo_bubo_	0.248	-0.0440644
Apteryx_ha|Caprimulgu	0.246	-0.760051
Apteryx_ha|Phodilus_b	0.24	-0.538734
Apteryx_ha|Falco_pere	0.229	0.186429
Apteryx_ha|Phaethon_r	0.22	-0.185345
Apteryx_ha|Buteo_bute	0.217	0.0958313
Apteryx_ha|Pandion_ha	0.223	-0.226948
Apteryx_ha|Sagittariu	0.215	0.375469
Apteryx_ha|Columba_li	0.213	0.00777739
Apteryx_ha|Anhinga_ru	0.218	0.431981
Apteryx_ha|Phalacroco	0.216	0.304486
Apteryx_ha|Morus_serr	0.216	-0.0716512
Apteryx_ha|Arenaria_i	0.21	-0.00942366
Apteryx_ha|Jacana_jac	0.218	0.539985
Apteryx_ha|Larus_domi	0.213	-0.23928
Apteryx_ha|Synthlibor	0.211	0.042908
Apteryx_ha|Haematopus	0.207	-0.102069
Apteryx_ha|Vanellus_v	0.21	-0.0597103
Apteryx_ha|Dupetor_fl	0.22	0.648289
Apteryx_ha|Botaurus_s	0.217	-0.0610585
Apteryx_ha|Aegotheles	0.224	-0.461046
Apteryx_ha|Grus_grus_	0.205	-0.0596637
Apteryx_ha|Otis_tarda	0.209	0.115812
Apteryx_ha|Nipponia_n	0.206	-0.0893956
Apteryx_ha|Pelecanus_	0.214	-0.251413
Apteryx_ha|Balaenicep	0.254	-0.112447
Casuarius_|Apus_apus_	0.207	-0.923978
Casuarius_|Archilochu	0.229	-0.817111
Casuarius_|Eudynamys_	0.218	-0.0903561
Casuarius_|Fulica_atr	0.227	-0.279345
Casuarius_|Agelaius_p	0.241	-0.588784
Casuarius_|Thraupis_e	0.237	-0.308306
Casuarius_|Cardinalis	0.243	-0.53409
Casuarius_|Fringilla_	0.242	-0.682657
Casuarius_|Himatione_	0.241	-0.816379
Casuarius_|Passer_mon	0.249	-0.76977
Casuarius_|Taeniopygi	0.233	-0.617834
Casuarius_|Luscinia_c	0.237	-0.720879
Casuarius_|Pseudopodo	0.238	-0.759031
Casuarius_|Turdus_hor	0.245	-0.621843
Casuarius_|Sturnus_se	0.241	-0.88104
Casuarius_|Bombycilla	0.243	-0.550107
Casuarius_|Regulus_ca	0.247	-0.395517
Casuarius_|Henicorhin	0.25	-0.498406
Casuarius_|Sitta_caro	0.245	-0.454634
Casuarius_|Aegithalos	0.247	-0.803825
Casuarius_|Phylloscop	0.241	-0.792464
Casuarius_|Acrocephal	0.249	-0.692169
Casuarius_|Cecropis_d	0.243	-0.710009
Casuarius_|Alauda_arv	0.243	-0.434213
Casuarius_|Megalurus_	0.243	-0.56267
Casuarius_|Pycnonotus	0.236	-0.683803
Casuarius_|Sylvia_atr	0.249	-0.757288
Casuarius_|Remiz_cons	0.249	-0.442084
Casuarius_|Garrulus_g	0.241	-0.768564
Casuarius_|Lanius_tep	0.251	-0.447488
Casuarius_|Oriolus_ch	0.251	-0.79161
Casuarius_|Vireo_oliv	0.24	-0.636269
Casuarius_|Tregellasi	0.247	-1.17147
Casuarius_|Petroica_b	0.242	-0.919645
Casuarius_|Mionectes_	0.243	-0.487648
Casuarius_|Acanthisit	0.236	-0.305575
Casuarius_|Dryocopus_	0.242	-0.404925
Casuarius_|Pterogloss	0.249	-0.667324
Casuarius_|Aceros_cor	0.227	-1.34915
Casuarius_|Aceros_wal	0.227	-1.43059
Casuarius_|Bycanistes	0.224	-0.955127
Casuarius_|Ceryle_rud	0.225	0.573705
Casuarius_|Todiramphu	0.219	-0.158508
Casuarius_|Eurystomus	0.228	-0.171259
Casuarius_|Amazona_ba	0.245	-1.33999
Casuarius_|Brotogeris	0.243	-1.00636
Casuarius_|Melopsitta	0.234	-1.28472
Casuarius_|Agapornis_	0.256	-0.948248
Casuarius_|Cacatua_mo	0.245	-1.38209
Casuarius_|Bubo_bubo_	0.244	-0.741277
Casuarius_|Caprimulgu	0.244	-1.45726
Casuarius_|Phodilus_b	0.236	-1.23595
Casuarius_|Falco_pere	0.23	-0.510784
Casuarius_|Phaethon_r	0.22	-0.882558
Casuarius_|Buteo_bute	0.214	-0.601382
Casuarius_|Pandion_ha	0.222	-0.92416
Casuarius_|Sagittariu	0.215	-0.321744
Casuarius_|Columba_li	0.217	-0.689436
Casuarius_|Anhinga_ru	0.216	-0.265232
Casuarius_|Phalacroco	0.206	-0.392727
Casuarius_|Morus_serr	0.209	-0.768864
Casuarius_|Arenaria_i	0.206	-0.706637
Casuarius_|Jacana_jac	0.218	-0.157228
Casuarius_|Larus_domi	0.21	-0.936493
Casuarius_|Synthlibor	0.209	-0.654305
Casuarius_|Haematopus	0.205	-0.799282
Casuarius_|Vanellus_v	0.208	-0.756923
Casuarius_|Dupetor_fl	0.211	-0.0489243
Casuarius_|Botaurus_s	0.212	-0.758271
Casuarius_|Aegotheles	0.219	-1.15826
Casuarius_|Grus_grus_	0.201	-0.756877
Casuarius_|Otis_tarda	0.205	-0.581401
Casuarius_|Nipponia_n	0.204	-0.786609
Casuarius_|Pelecanus_	0.212	-0.948626
Casuarius_|Balaenicep	0.257	-0.80966
Apus_apus_|Archilochu	0.19	0.106867
Apus_apus_|Eudynamys_	0.185	0.833622
Apus_apus_|Fulica_atr	0.193	0.644634
Apus_apus_|Agelaius_p	0.22	0.335194
Apus_apus_|Thraupis_e	0.222	0.615672
Apus_apus_|Cardinalis	0.228	0.389888
Apus_apus_|Fringilla_	0.219	0.241321
Apus_apus_|Himatione_	0.223	0.107599
Apus_apus_|Passer_mon	0.227	0.154208
Apus_apus_|Taeniopygi	0.217	0.306145
Apus_apus_|Luscinia_c	0.216	0.203099
Apus_apus_|Pseudopodo	0.219	0.164947
Apus_apus_|Turdus_hor	0.227	0.302136
Apus_apus_|Sturnus_se	0.221	0.0429378
Apus_apus_|Bombycilla	0.232	0.373871
Apus_apus_|Regulus_ca	0.228	0.528462
Apus_apus_|Henicorhin	0.23	0.425572
Apus_apus_|Sitta_caro	0.223	0.469344
Apus_apus_|Aegithalos	0.228	0.120153
Apus_apus_|Phylloscop	0.22	0.131514
Apus_apus_|Acrocephal	0.23	0.231809
Apus_apus_|Cecropis_d	0.223	0.21397
Apus_apus_|Alauda_arv	0.224	0.489766
Apus_apus_|Megalurus_	0.224	0.361308
Apus_apus_|Pycnonotus	0.222	0.240175
Apus_apus_|Sylvia_atr	0.228	0.166691
Apus_apus_|Remiz_cons	0.22	0.481894
Apus_apus_|Garrulus_g	0.227	0.155414
Apus_apus_|Lanius_tep	0.232	0.47649
Apus_apus_|Oriolus_ch	0.229	0.132369
Apus_apus_|Vireo_oliv	0.22	0.287709
Apus_apus_|Tregellasi	0.232	-0.247492
Apus_apus_|Petroica_b	0.226	0.00433364
Apus_apus_|Mionectes_	0.221	0.436331
Apus_apus_|Acanthisit	0.219	0.618403
Apus_apus_|Dryocopus_	0.219	0.519053
Apus_apus_|Pterogloss	0.219	0.256655
Apus_apus_|Aceros_cor	0.201	-0.42517
Apus_apus_|Aceros_wal	0.198	-0.506615
Apus_apus_|Bycanistes	0.189	-0.0311483
Apus_apus_|Ceryle_rud	0.194	1.49768
Apus_apus_|Todiramphu	0.197	0.76547
Apus_apus_|Eurystomus	0.202	0.752719
Apus_apus_|Amazona_ba	0.206	-0.41601
Apus_apus_|Brotogeris	0.206	-0.082382
Apus_apus_|Melopsitta	0.196	-0.360739
Apus_apus_|Agapornis_	0.218	-0.0242695
Apus_apus_|Cacatua_mo	0.216	-0.45811
Apus_apus_|Bubo_bubo_	0.216	0.182701
Apus_apus_|Caprimulgu	0.212	-0.533286
Apus_apus_|Phodilus_b	0.215	-0.311968
Apus_apus_|Falco_pere	0.201	0.413194
Apus_apus_|Phaethon_r	0.194	0.0414205
Apus_apus_|Buteo_bute	0.186	0.322597
Apus_apus_|Pandion_ha	0.193	-0.000182253
Apus_apus_|Sagittariu	0.18	0.602234
Apus_apus_|Columba_li	0.185	0.234543
Apus_apus_|Anhinga_ru	0.187	0.658746
Apus_apus_|Phalacroco	0.179	0.531251
Apus_apus_|Morus_serr	0.184	0.155114
Apus_apus_|Arenaria_i	0.182	0.217342
Apus_apus_|Jacana_jac	0.193	0.76675
Apus_apus_|Larus_domi	0.178	-0.0125144
Apus_apus_|Synthlibor	0.18	0.269673
Apus_apus_|Haematopus	0.171	0.124697
Apus_apus_|Vanellus_v	0.176	0.167055
Apus_apus_|Dupetor_fl	0.183	0.875054
Apus_apus_|Botaurus_s	0.182	0.165707
Apus_apus_|Aegotheles	0.18	-0.23428
Apus_apus_|Grus_grus_	0.17	0.167102
Apus_apus_|Otis_tarda	0.176	0.342577
Apus_apus_|Nipponia_n	0.173	0.13737
Apus_apus_|Pelecanus_	0.175	-0.0246476
Apus_apus_|Balaenicep	0.218	0.114318
Archilochu|Eudynamys_	0.206	0.726755
Archilochu|Fulica_atr	0.211	0.537767
Archilochu|Agelaius_p	0.23	0.228327
Archilochu|Thraupis_e	0.232	0.508805
Archilochu|Cardinalis	0.241	0.283021
Archilochu|Fringilla_	0.229	0.134454
Archilochu|Himatione_	0.242	0.000732079
Archilochu|Passer_mon	0.237	0.047341
Archilochu|Taeniopygi	0.229	0.199277
Archilochu|Luscinia_c	0.227	0.0962319
Archilochu|Pseudopodo	0.231	0.0580799
Archilochu|Turdus_hor	0.238	0.195269
Archilochu|Sturnus_se	0.23	-0.0639293
Archilochu|Bombycilla	0.248	0.267004
Archilochu|Regulus_ca	0.244	0.421595
Archilochu|Henicorhin	0.246	0.318705
Archilochu|Sitta_caro	0.231	0.362477
Archilochu|Aegithalos	0.241	0.013286
Archilochu|Phylloscop	0.23	0.0246468
Archilochu|Acrocephal	0.241	0.124942
Archilochu|Cecropis_d	0.236	0.107102
Archilochu|Alauda_arv	0.236	0.382899
Archilochu|Megalurus_	0.237	0.254441
Archilochu|Pycnonotus	0.232	0.133308
Archilochu|Sylvia_atr	0.245	0.0598235
Archilochu|Remiz_cons	0.233	0.375027
Archilochu|Garrulus_g	0.244	0.0485467
Archilochu|Lanius_tep	0.248	0.369623
Archilochu|Oriolus_ch	0.242	0.0255015
Archilochu|Vireo_oliv	0.233	0.180842
Archilochu|Tregellasi	0.237	-0.354359
Archilochu|Petroica_b	0.232	-0.102533
Archilochu|Mionectes_	0.239	0.329463
Archilochu|Acanthisit	0.23	0.511536
Archilochu|Dryocopus_	0.231	0.412186
Archilochu|Pterogloss	0.238	0.149788
Archilochu|Aceros_cor	0.221	-0.532038
Archilochu|Aceros_wal	0.219	-0.613482
Archilochu|Bycanistes	0.214	-0.138015
Archilochu|Ceryle_rud	0.212	1.39082
Archilochu|Todiramphu	0.215	0.658603
Archilochu|Eurystomus	0.221	0.645852
Archilochu|Amazona_ba	0.227	-0.522877
Archilochu|Brotogeris	0.23	-0.189249
Archilochu|Melopsitta	0.221	-0.467606
Archilochu|Agapornis_	0.237	-0.131137
Archilochu|Cacatua_mo	0.235	-0.564977
Archilochu|Bubo_bubo_	0.234	0.0758338
Archilochu|Caprimulgu	0.231	-0.640153
Archilochu|Phodilus_b	0.231	-0.418836
Archilochu|Falco_pere	0.23	0.306327
Archilochu|Phaethon_r	0.218	-0.0654466
Archilochu|Buteo_bute	0.209	0.21573
Archilochu|Pandion_ha	0.22	-0.107049
Archilochu|Sagittariu	0.211	0.495367
Archilochu|Columba_li	0.212	0.127676
Archilochu|Anhinga_ru	0.208	0.551879
Archilochu|Phalacroco	0.202	0.424384
Archilochu|Morus_serr	0.209	0.0482471
Archilochu|Arenaria_i	0.206	0.110475
Archilochu|Jacana_jac	0.213	0.659883
Archilochu|Larus_domi	0.202	-0.119382
Archilochu|Synthlibor	0.205	0.162806
Archilochu|Haematopus	0.198	0.0178295
Archilochu|Vanellus_v	0.199	0.0601879
Archilochu|Dupetor_fl	0.212	0.768187
Archilochu|Botaurus_s	0.207	0.0588398
Archilochu|Aegotheles	0.213	-0.341147
Archilochu|Grus_grus_	0.198	0.0602345
Archilochu|Otis_tarda	0.204	0.23571
Archilochu|Nipponia_n	0.198	0.0305026
Archilochu|Pelecanus_	0.202	-0.131515
Archilochu|Balaenicep	0.245	0.0074509
Eudynamys_|Fulica_atr	0.198	-0.188988
Eudynamys_|Agelaius_p	0.227	-0.498428
Eudynamys_|Thraupis_e	0.229	-0.21795
Eudynamys_|Cardinalis	0.232	-0.443734
Eudynamys_|Fringilla_	0.226	-0.592301
Eudynamys_|Himatione_	0.235	-0.726023
Eudynamys_|Passer_mon	0.234	-0.679414
Eudynamys_|Taeniopygi	0.224	-0.527478
Eudynamys_|Luscinia_c	0.221	-0.630523
Eudynamys_|Pseudopodo	0.225	-0.668675
Eudynamys_|Turdus_hor	0.233	-0.531486
Eudynamys_|Sturnus_se	0.23	-0.790684
Eudynamys_|Bombycilla	0.236	-0.459751
Eudynamys_|Regulus_ca	0.23	-0.30516
Eudynamys_|Henicorhin	0.235	-0.40805
Eudynamys_|Sitta_caro	0.228	-0.364278
Eudynamys_|Aegithalos	0.237	-0.713469
Eudynamys_|Phylloscop	0.229	-0.702108
Eudynamys_|Acrocephal	0.233	-0.601813
Eudynamys_|Cecropis_d	0.233	-0.619653
Eudynamys_|Alauda_arv	0.231	-0.343856
Eudynamys_|Megalurus_	0.23	-0.472314
Eudynamys_|Pycnonotus	0.228	-0.593447
Eudynamys_|Sylvia_atr	0.237	-0.666932
Eudynamys_|Remiz_cons	0.238	-0.351728
Eudynamys_|Garrulus_g	0.234	-0.678208
Eudynamys_|Lanius_tep	0.231	-0.357132
Eudynamys_|Oriolus_ch	0.238	-0.701254
Eudynamys_|Vireo_oliv	0.222	-0.545913
Eudynamys_|Tregellasi	0.228	-1.08111
Eudynamys_|Petroica_b	0.23	-0.829288
Eudynamys_|Mionectes_	0.225	-0.397292
Eudynamys_|Acanthisit	0.224	-0.215219
Eudynamys_|Dryocopus_	0.231	-0.314569
Eudynamys_|Pterogloss	0.235	-0.576967
Eudynamys_|Aceros_cor	0.209	-1.25879
Eudynamys_|Aceros_wal	0.208	-1.34024
Eudynamys_|Bycanistes	0.204	-0.86477
Eudynamys_|Ceryle_rud	0.201	0.664061
Eudynamys_|Todiramphu	0.208	-0.0681523
Eudynamys_|Eurystomus	0.211	-0.0809031
Eudynamys_|Amazona_ba	0.222	-1.24963
Eudynamys_|Brotogeris	0.223	-0.916004
Eudynamys_|Melopsitta	0.214	-1.19436
Eudynamys_|Agapornis_	0.234	-0.857892
Eudynamys_|Cacatua_mo	0.224	-1.29173
Eudynamys_|Bubo_bubo_	0.228	-0.650921
Eudynamys_|Caprimulgu	0.218	-1.36691
Eudynamys_|Phodilus_b	0.219	-1.14559
Eudynamys_|Falco_pere	0.21	-0.420428
Eudynamys_|Phaethon_r	0.199	-0.792202
Eudynamys_|Buteo_bute	0.192	-0.511025
Eudynamys_|Pandion_ha	0.2	-0.833804
Eudynamys_|Sagittariu	0.198	-0.231388
Eudynamys_|Columba_li	0.195	-0.599079
Eudynamys_|Anhinga_ru	0.193	-0.174876
Eudynamys_|Phalacroco	0.186	-0.302371
Eudynamys_|Morus_serr	0.189	-0.678508
Eudynamys_|Arenaria_i	0.186	-0.61628
Eudynamys_|Jacana_jac	0.195	-0.0668722
Eudynamys_|Larus_domi	0.188	-0.846137
Eudynamys_|Synthlibor	0.182	-0.563949
Eudynamys_|Haematopus	0.183	-0.708926
Eudynamys_|Vanellus_v	0.186	-0.666567
Eudynamys_|Dupetor_fl	0.191	0.0414318
Eudynamys_|Botaurus_s	0.19	-0.667915
Eudynamys_|Aegotheles	0.197	-1.0679
Eudynamys_|Grus_grus_	0.178	-0.66652
Eudynamys_|Otis_tarda	0.189	-0.491045
Eudynamys_|Nipponia_n	0.183	-0.696252
Eudynamys_|Pelecanus_	0.184	-0.85827
Eudynamys_|Balaenicep	0.228	-0.719304
Fulica_atr|Agelaius_p	0.233	-0.309439
Fulica_atr|Thraupis_e	0.231	-0.0289619
Fulica_atr|Cardinalis	0.24	-0.254745
Fulica_atr|Fringilla_	0.229	-0.403313
Fulica_atr|Himatione_	0.235	-0.537034
Fulica_atr|Passer_mon	0.236	-0.490426
Fulica_atr|Taeniopygi	0.225	-0.338489
Fulica_atr|Luscinia_c	0.223	-0.441535
Fulica_atr|Pseudopodo	0.229	-0.479687
Fulica_atr|Turdus_hor	0.236	-0.342498
Fulica_atr|Sturnus_se	0.23	-0.601696
Fulica_atr|Bombycilla	0.237	-0.270763
Fulica_atr|Regulus_ca	0.239	-0.116172
Fulica_atr|Henicorhin	0.238	-0.219061
Fulica_atr|Sitta_caro	0.231	-0.175289
Fulica_atr|Aegithalos	0.238	-0.524481
Fulica_atr|Phylloscop	0.229	-0.51312
Fulica_atr|Acrocephal	0.238	-0.412824
Fulica_atr|Cecropis_d	0.232	-0.430664
Fulica_atr|Alauda_arv	0.233	-0.154868
Fulica_atr|Megalurus_	0.234	-0.283326
Fulica_atr|Pycnonotus	0.229	-0.404459
Fulica_atr|Sylvia_atr	0.236	-0.477943
Fulica_atr|Remiz_cons	0.233	-0.162739
Fulica_atr|Garrulus_g	0.24	-0.48922
Fulica_atr|Lanius_tep	0.244	-0.168144
Fulica_atr|Oriolus_ch	0.238	-0.512265
Fulica_atr|Vireo_oliv	0.228	-0.356924
Fulica_atr|Tregellasi	0.233	-0.892125
Fulica_atr|Petroica_b	0.236	-0.6403
Fulica_atr|Mionectes_	0.23	-0.208303
Fulica_atr|Acanthisit	0.221	-0.0262308
Fulica_atr|Dryocopus_	0.229	-0.125581
Fulica_atr|Pterogloss	0.229	-0.387979
Fulica_atr|Aceros_cor	0.209	-1.0698
Fulica_atr|Aceros_wal	0.204	-1.15125
Fulica_atr|Bycanistes	0.201	-0.675782
Fulica_atr|Ceryle_rud	0.21	0.85305
Fulica_atr|Todiramphu	0.205	0.120836
Fulica_atr|Eurystomus	0.213	0.108085
Fulica_atr|Amazona_ba	0.221	-1.06064
Fulica_atr|Brotogeris	0.219	-0.727016
Fulica_atr|Melopsitta	0.211	-1.00537
Fulica_atr|Agapornis_	0.236	-0.668903
Fulica_atr|Cacatua_mo	0.229	-1.10274
Fulica_atr|Bubo_bubo_	0.229	-0.461933
Fulica_atr|Caprimulgu	0.224	-1.17792
Fulica_atr|Phodilus_b	0.22	-0.956602
Fulica_atr|Falco_pere	0.218	-0.23144
Fulica_atr|Phaethon_r	0.205	-0.603213
Fulica_atr|Buteo_bute	0.201	-0.322037
Fulica_atr|Pandion_ha	0.212	-0.644816
Fulica_atr|Sagittariu	0.197	-0.0423996
Fulica_atr|Columba_li	0.203	-0.410091
Fulica_atr|Anhinga_ru	0.196	0.0141123
Fulica_atr|Phalacroco	0.189	-0.113382
Fulica_atr|Morus_serr	0.196	-0.489519
Fulica_atr|Arenaria_i	0.202	-0.427292
Fulica_atr|Jacana_jac	0.199	0.122116
Fulica_atr|Larus_domi	0.197	-0.657148
Fulica_atr|Synthlibor	0.196	-0.37496
Fulica_atr|Haematopus	0.188	-0.519937
Fulica_atr|Vanellus_v	0.187	-0.477579
Fulica_atr|Dupetor_fl	0.2	0.23042
Fulica_atr|Botaurus_s	0.202	-0.478927
Fulica_atr|Aegotheles	0.205	-0.878914
Fulica_atr|Grus_grus_	0.177	-0.477532
Fulica_atr|Otis_tarda	0.192	-0.302056
Fulica_atr|Nipponia_n	0.188	-0.507264
Fulica_atr|Pelecanus_	0.193	-0.669281
Fulica_atr|Balaenicep	0.236	-0.530316
Agelaius_p|Thraupis_e	0.107	0.280477
Agelaius_p|Cardinalis	0.116	0.0546938
Agelaius_p|Fringilla_	0.121	-0.0938737
Agelaius_p|Himatione_	0.123	-0.227595
Agelaius_p|Passer_mon	0.132	-0.180986
Agelaius_p|Taeniopygi	0.133	-0.02905
Agelaius_p|Luscinia_c	0.15	-0.132096
Agelaius_p|Pseudopodo	0.154	-0.170248
Agelaius_p|Turdus_hor	0.164	-0.0330588
Agelaius_p|Sturnus_se	0.158	-0.292257
Agelaius_p|Bombycilla	0.167	0.0386763
Agelaius_p|Regulus_ca	0.169	0.193267
Agelaius_p|Henicorhin	0.167	0.090378
Agelaius_p|Sitta_caro	0.163	0.13415
Agelaius_p|Aegithalos	0.163	-0.215041
Agelaius_p|Phylloscop	0.161	-0.203681
Agelaius_p|Acrocephal	0.164	-0.103385
Agelaius_p|Cecropis_d	0.165	-0.121225
Agelaius_p|Alauda_arv	0.163	0.154571
Agelaius_p|Megalurus_	0.157	0.0261135
Agelaius_p|Pycnonotus	0.159	-0.0950197
Agelaius_p|Sylvia_atr	0.178	-0.168504
Agelaius_p|Remiz_cons	0.159	0.1467
Agelaius_p|Garrulus_g	0.174	-0.179781
Agelaius_p|Lanius_tep	0.186	0.141295
Agelaius_p|Oriolus_ch	0.174	-0.202826
Agelaius_p|Vireo_oliv	0.161	-0.0474854
Agelaius_p|Tregellasi	0.165	-0.582686
Agelaius_p|Petroica_b	0.166	-0.330861
Agelaius_p|Mionectes_	0.231	0.101136
Agelaius_p|Acanthisit	0.23	0.283208
Agelaius_p|Dryocopus_	0.247	0.183859
Agelaius_p|Pterogloss	0.243	-0.0785399
Agelaius_p|Aceros_cor	0.226	-0.760365
Agelaius_p|Aceros_wal	0.227	-0.84181
Agelaius_p|Bycanistes	0.222	-0.366343
Agelaius_p|Ceryle_rud	0.232	1.16249
Agelaius_p|Todiramphu	0.231	0.430275
Agelaius_p|Eurystomus	0.229	0.417524
Agelaius_p|Amazona_ba	0.238	-0.751204
Agelaius_p|Brotogeris	0.239	-0.417576
Agelaius_p|Melopsitta	0.234	-0.695934
Agelaius_p|Agapornis_	0.247	-0.359464
Agelaius_p|Cacatua_mo	0.246	-0.793305
Agelaius_p|Bubo_bubo_	0.247	-0.152494
Agelaius_p|Caprimulgu	0.243	-0.86848
Agelaius_p|Phodilus_b	0.237	-0.647163
Agelaius_p|Falco_pere	0.237	0.0779995
Agelaius_p|Phaethon_r	0.226	-0.293774
Agelaius_p|Buteo_bute	0.221	-0.0125979
Agelaius_p|Pandion_ha	0.232	-0.335377
Agelaius_p|Sagittariu	0.22	0.267039
Agelaius_p|Columba_li	0.217	-0.100652
Agelaius_p|Anhinga_ru	0.224	0.323551
Agelaius_p|Phalacroco	0.223	0.196057
Agelaius_p|Morus_serr	0.222	-0.18008
Agelaius_p|Arenaria_i	0.213	-0.117853
Agelaius_p|Jacana_jac	0.223	0.431555
Agelaius_p|Larus_domi	0.217	-0.347709
Agelaius_p|Synthlibor	0.212	-0.0655212
Agelaius_p|Haematopus	0.213	-0.210498
Agelaius_p|Vanellus_v	0.219	-0.16814
Agelaius_p|Dupetor_fl	0.223	0.539859
Agelaius_p|Botaurus_s	0.221	-0.169488
Agelaius_p|Aegotheles	0.234	-0.569475
Agelaius_p|Grus_grus_	0.218	-0.168093
Agelaius_p|Otis_tarda	0.219	0.00738262
Agelaius_p|Nipponia_n	0.215	-0.197825
Agelaius_p|Pelecanus_	0.215	-0.359842
Agelaius_p|Balaenicep	0.258	-0.220877
Thraupis_e|Cardinalis	0.115	-0.225783
Thraupis_e|Fringilla_	0.122	-0.374351
Thraupis_e|Himatione_	0.126	-0.508073
Thraupis_e|Passer_mon	0.134	-0.461464
Thraupis_e|Taeniopygi	0.137	-0.309527
Thraupis_e|Luscinia_c	0.151	-0.412573
Thraupis_e|Pseudopodo	0.151	-0.450725
Thraupis_e|Turdus_hor	0.162	-0.313536
Thraupis_e|Sturnus_se	0.163	-0.572734
Thraupis_e|Bombycilla	0.17	-0.241801
Thraupis_e|Regulus_ca	0.168	-0.0872101
Thraupis_e|Henicorhin	0.167	-0.190099
Thraupis_e|Sitta_caro	0.166	-0.146327
Thraupis_e|Aegithalos	0.166	-0.495519
Thraupis_e|Phylloscop	0.16	-0.484158
Thraupis_e|Acrocephal	0.167	-0.383862
Thraupis_e|Cecropis_d	0.168	-0.401702
Thraupis_e|Alauda_arv	0.164	-0.125906
Thraupis_e|Megalurus_	0.157	-0.254364
Thraupis_e|Pycnonotus	0.158	-0.375497
Thraupis_e|Sylvia_atr	0.175	-0.448981
Thraupis_e|Remiz_cons	0.16	-0.133778
Thraupis_e|Garrulus_g	0.176	-0.460258
Thraupis_e|Lanius_tep	0.185	-0.139182
Thraupis_e|Oriolus_ch	0.18	-0.483303
Thraupis_e|Vireo_oliv	0.165	-0.327963
Thraupis_e|Tregellasi	0.17	-0.863163
Thraupis_e|Petroica_b	0.168	-0.611338
Thraupis_e|Mionectes_	0.23	-0.179341
Thraupis_e|Acanthisit	0.228	0.00273106
Thraupis_e|Dryocopus_	0.247	-0.0966188
Thraupis_e|Pterogloss	0.245	-0.359017
Thraupis_e|Aceros_cor	0.225	-1.04084
Thraupis_e|Aceros_wal	0.226	-1.12229
Thraupis_e|Bycanistes	0.22	-0.64682
Thraupis_e|Ceryle_rud	0.228	0.882012
Thraupis_e|Todiramphu	0.23	0.149798
Thraupis_e|Eurystomus	0.229	0.137047
Thraupis_e|Amazona_ba	0.24	-1.03168
Thraupis_e|Brotogeris	0.236	-0.698054
Thraupis_e|Melopsitta	0.231	-0.976411
Thraupis_e|Agapornis_	0.248	-0.639941
Thraupis_e|Cacatua_mo	0.248	-1.07378
Thraupis_e|Bubo_bubo_	0.245	-0.432971
Thraupis_e|Caprimulgu	0.244	-1.14896
Thraupis_e|Phodilus_b	0.239	-0.92764
Thraupis_e|Falco_pere	0.239	-0.202478
Thraupis_e|Phaethon_r	0.227	-0.574251
Thraupis_e|Buteo_bute	0.221	-0.293075
Thraupis_e|Pandion_ha	0.231	-0.615854
Thraupis_e|Sagittariu	0.22	-0.0134378
Thraupis_e|Columba_li	0.219	-0.381129
Thraupis_e|Anhinga_ru	0.228	0.0430741
Thraupis_e|Phalacroco	0.223	-0.0844204
Thraupis_e|Morus_serr	0.225	-0.460558
Thraupis_e|Arenaria_i	0.219	-0.39833
Thraupis_e|Jacana_jac	0.221	0.151078
Thraupis_e|Larus_domi	0.217	-0.628186
Thraupis_e|Synthlibor	0.216	-0.345998
Thraupis_e|Haematopus	0.214	-0.490975
Thraupis_e|Vanellus_v	0.217	-0.448617
Thraupis_e|Dupetor_fl	0.223	0.259382
Thraupis_e|Botaurus_s	0.223	-0.449965
Thraupis_e|Aegotheles	0.233	-0.849952
Thraupis_e|Grus_grus_	0.215	-0.44857
Thraupis_e|Otis_tarda	0.221	-0.273095
Thraupis_e|Nipponia_n	0.216	-0.478302
Thraupis_e|Pelecanus_	0.219	-0.640319
Thraupis_e|Balaenicep	0.256	-0.501354
Cardinalis|Fringilla_	0.135	-0.148567
Cardinalis|Himatione_	0.136	-0.282289
Cardinalis|Passer_mon	0.145	-0.23568
Cardinalis|Taeniopygi	0.141	-0.0837438
Cardinalis|Luscinia_c	0.159	-0.186789
Cardinalis|Pseudopodo	0.157	-0.224941
Cardinalis|Turdus_hor	0.169	-0.0877526
Cardinalis|Sturnus_se	0.169	-0.346951
Cardinalis|Bombycilla	0.171	-0.0160175
Cardinalis|Regulus_ca	0.176	0.138573
Cardinalis|Henicorhin	0.174	0.0356842
Cardinalis|Sitta_caro	0.171	0.0794561
Cardinalis|Aegithalos	0.173	-0.269735
Cardinalis|Phylloscop	0.166	-0.258374
Cardinalis|Acrocephal	0.174	-0.158079
Cardinalis|Cecropis_d	0.175	-0.175919
Cardinalis|Alauda_arv	0.173	0.0998773
Cardinalis|Megalurus_	0.164	-0.0285803
Cardinalis|Pycnonotus	0.168	-0.149713
Cardinalis|Sylvia_atr	0.183	-0.223198
Cardinalis|Remiz_cons	0.172	0.0920059
Cardinalis|Garrulus_g	0.178	-0.234474
Cardinalis|Lanius_tep	0.189	0.0866015
Cardinalis|Oriolus_ch	0.182	-0.25752
Cardinalis|Vireo_oliv	0.171	-0.102179
Cardinalis|Tregellasi	0.18	-0.63738
Cardinalis|Petroica_b	0.177	-0.385555
Cardinalis|Mionectes_	0.238	0.0464423
Cardinalis|Acanthisit	0.233	0.228515
Cardinalis|Dryocopus_	0.255	0.129165
Cardinalis|Pterogloss	0.254	-0.133234
Cardinalis|Aceros_cor	0.233	-0.815059
Cardinalis|Aceros_wal	0.236	-0.896504
Cardinalis|Bycanistes	0.231	-0.421037
Cardinalis|Ceryle_rud	0.239	1.1078
Cardinalis|Todiramphu	0.237	0.375581
Cardinalis|Eurystomus	0.236	0.362831
Cardinalis|Amazona_ba	0.245	-0.805898
Cardinalis|Brotogeris	0.248	-0.47227
Cardinalis|Melopsitta	0.243	-0.750627
Cardinalis|Agapornis_	0.258	-0.414158
Cardinalis|Cacatua_mo	0.256	-0.847999
Cardinalis|Bubo_bubo_	0.257	-0.207187
Cardinalis|Caprimulgu	0.251	-0.923174
Cardinalis|Phodilus_b	0.247	-0.701857
Cardinalis|Falco_pere	0.248	0.0233057
Cardinalis|Phaethon_r	0.232	-0.348468
Cardinalis|Buteo_bute	0.233	-0.0672917
Cardinalis|Pandion_ha	0.24	-0.390071
Cardinalis|Sagittariu	0.227	0.212346
Cardinalis|Columba_li	0.229	-0.155346
Cardinalis|Anhinga_ru	0.232	0.268858
Cardinalis|Phalacroco	0.232	0.141363
Cardinalis|Morus_serr	0.227	-0.234774
Cardinalis|Arenaria_i	0.217	-0.172547
Cardinalis|Jacana_jac	0.228	0.376862
Cardinalis|Larus_domi	0.222	-0.402403
Cardinalis|Synthlibor	0.22	-0.120215
Cardinalis|Haematopus	0.218	-0.265192
Cardinalis|Vanellus_v	0.222	-0.222833
Cardinalis|Dupetor_fl	0.228	0.485166
Cardinalis|Botaurus_s	0.229	-0.224181
Cardinalis|Aegotheles	0.241	-0.624169
Cardinalis|Grus_grus_	0.225	-0.222787
Cardinalis|Otis_tarda	0.227	-0.0473112
Cardinalis|Nipponia_n	0.224	-0.252519
Cardinalis|Pelecanus_	0.222	-0.414536
[truncated: 2,279 more rows]
